# Supplementary material for: Adherence to Dihydroartemisinin-Piperaquine Treatment among Patients with Uncomplicated Malaria in Northern Ghana
Source: Hindawi journal article supplement (doi:10.1155/2019/5198010), 2019-04-01
Supplement: f1 [file 5198010.f1.pdf]

| idno | q1        | q2        | q10 | q11       | q12 | q12a | q17a | q18 | q19 | q19a | q20       | q21 | q21b |
|------|-----------|-----------|-----|-----------|-----|------|------|-----|-----|------|-----------|-----|------|
| 1    | 20-Oct-14 | 23-Oct-14 | F   | 24-Mar-05 | 888 |      | NA   | C   | 8   | NA   | 23-Oct-14 | 7   | 34   |
| 2    | 20-Oct-14 | 23-Oct-14 | F   | 15-Jun-04 |     | Y    | NA   | C   | 8   | NA   | 23-Oct-14 | 9   | 4    |
| 3    | 20-Oct-14 | 23-Oct-14 | F   | 10-Dec-71 |     | Y    | NA   | C   | 8   | NA   | 23-Oct-14 | 6   | 40   |
| 4    | 20-Oct-14 | 23-Oct-14 | F   | 13-May-72 |     | Y    | NA   | C   | 8   | NA   | 23-Oct-14 |     |      |
| 5    | 20-Oct-14 | 23-Oct-14 | F   | 4-Jan-09  |     | Y    | NA   | C   | 8   | NA   | 23-Oct-14 | 10  | 5    |
| 6    | 21-Oct-14 | 24-Oct-14 | F   | 5-Nov-07  |     | Y    | NA   | C   | 8   | NA   | 24-Oct-14 | 8   | 0    |
| 7    | 21-Oct-14 | 24-Oct-14 | M   | 25-Feb-03 |     | Y    | NA   | C   | 8   | NA   | 24-Oct-14 | 8   | 18   |
| 8    | 21-Oct-14 | 24-Oct-14 | M   | 14-May-05 | 9   | Y    | NA   | C   | 8   | NA   | 24-Oct-14 | 9   | 51   |
| 9    | 21-Oct-14 | 24-Oct-14 | F   | 7-Sep-06  | 8   | Y    | NA   | C   | 8   | NA   | 24-Oct-14 | 7   | 34   |
| 10   | 21-Oct-14 | 24-Oct-14 | M   | 7-Aug-04  |     | Y    | NA   | C   | 8   | NA   | 24-Oct-14 | 6   | 52   |
| 11   | 28-Oct-14 | 31-Oct-14 | F   | 15-Jun-71 |     | Y    | NA   | C   | 8   | NA   | 31-Oct-14 | 7   | 23   |
| 12   | 28-Oct-14 | 31-Oct-14 | F   | 8-Dec-11  | 2   | Y    | NA   | C   | 8   | NA   | 31-Oct-14 | 9   | 8    |
| 13   | 28-Oct-14 | 31-Oct-14 | M   | 14-Feb-01 | 13  | Y    | NA   | C   | 8   | NA   | 31-Oct-14 | 8   | 20   |
| 14   | 3-Nov-14  | 6-Nov-14  | M   | 11-Mar-12 |     | Y    | NA   | C   | 8   | NA   | 6-Nov-14  | 8   | 12   |
| 15   | 3-Nov-14  | 6-Nov-14  | M   | 27-Apr-09 |     | Y    | NA   | C   | 8   | NA   | 6-Nov-14  | 6   | 50   |
| 16   | 3-Nov-14  | 6-Nov-14  | F   | 15-Jun-88 |     | Y    | NA   | C   | 8   | NA   | 6-Nov-14  | 7   | 48   |
| 17   | 3-Nov-14  | 6-Nov-14  | F   | 25-Jul-00 |     | Y    | NA   | C   | 8   | NA   | 6-Nov-14  | 8   | 43   |
| 18   | 4-Nov-14  | 7-Nov-14  | M   | 1-Mar-89  | 25  | Y    | NA   | C   | 8   | NA   | 7-Nov-14  | 7   | 22   |
| 19   | 4-Nov-14  | 7-Nov-14  | F   | 15-Jul-66 |     | Y    | NA   | C   | 8   | NA   | 7-Nov-14  | 7   | 41   |
| 20   | 4-Nov-14  | 7-Nov-14  | F   | 13-Jul-03 | 11  | Y    | NA   | C   | 8   | NA   | 7-Nov-14  | 7   | 56   |
| 21   | 4-Nov-14  | 7-Nov-14  | M   | 18-May-10 |     | Y    | NA   | C   | 8   | NA   | 7-Nov-14  | 8   | 11   |
| 22   | 4-Nov-14  | 7-Nov-14  | F   | 24-Jul-10 | 4   | Y    | NA   | C   | 8   | NA   | 7-Nov-14  | 6   | 41   |
| 23   | 4-Nov-14  | 7-Nov-14  | M   | 27-Jul-06 | 8   | Y    | NA   | C   | 8   | NA   | 7-Nov-14  | 8   | 43   |
| 24   | 4-Nov-14  | 7-Nov-14  | F   | 6-Oct-52  |     |      | NA   | C   | 8   | NA   | 7-Nov-14  | 8   | 59   |
| 25   | 10-Nov-14 | 13-Nov-14 | F   | 22-Jun-01 |     | Y    | NA   | C   | 8   | NA   | 13-Nov-14 | 7   | 5    |
| 26   | 10-Nov-14 | 13-Nov-14 | F   | 26-Apr-06 |     | Y    | NA   | C   | 8   | NA   | 13-Nov-14 | 8   | 5    |
| 27   | 10-Nov-14 | 13-Nov-14 | F   | 2-Nov-10  |     | Y    | NA   | C   | 8   | NA   | 13-Nov-14 | 8   | 40   |
| 28   | 10-Nov-14 | 13-Nov-14 | F   | 7-Apr-01  |     | Y    | NA   | C   | 8   | NA   | 13-Nov-14 |     |      |
| 29   | 10-Nov-14 | 13-Nov-14 | F   | 5-Mar-02  | 12  | Y    | NA   | C   | 8   | NA   | 13-Nov-14 | 6   | 47   |
| 30   | 11-Nov-14 | 14-Nov-14 | M   | 31-Aug-12 | 2   | Y    | NA   | C   | 8   | NA   | 14-Nov-14 | 9   | 5    |
| 31   | 11-Nov-14 | 14-Nov-14 | F   | 10-Jun-02 | 12  | Y    | NA   | C   | 8   | NA   | 14-Nov-14 | 7   | 53   |
| 32   | 11-Nov-14 | 14-Nov-14 | F   | 10-Nov-05 |     | Y    | NA   | C   | 8   | NA   | 14-Nov-14 | 7   | 11   |
| 33   | 11-Nov-14 | 14-Nov-14 | F   | 3-Jan-11  |     | Y    | NA   | C   | 8   | NA   | 14-Nov-14 | 8   | 27   |
| 34   | 17-Nov-14 | 20-Nov-14 | F   | 11-May-74 |     | Y    | NA   | C   | 8   | NA   | 20-Nov-14 | 7   | 17   |
| 35   | 17-Nov-14 | 20-Nov-14 | F   | 15-Sep-83 | 31  | Y    | NA   | C   | 8   | NA   | 20-Nov-14 | 7   | 53   |
| 36   | 17-Nov-14 | 18-Nov-14 | F   | 5-Apr-84  | 30  | Y    | NA   | C   | 8   | NA   | 20-Nov-14 | 9   | 12   |
| 37   | 17-Nov-14 | 20-Nov-14 | F   | 5-May-00  | 14  | Y    | NA   | C   | 8   | NA   | 20-Nov-14 | 8   | 25   |
| 38   | 24-Nov-14 | 27-Nov-14 | F   | 19-Aug-10 | 4   | Y    | NA   | C   | 8   | NA   | 27-Nov-14 | 7   | 44   |
| 39   | 24-Nov-14 | 27-Nov-14 | F   | 26-Jun-02 | 12  | Y    | NA   | C   | 8   | NA   | 27-Nov-14 | 7   | 18   |
| 40   | 28-Nov-14 | 1-Dec-14  | F   | 11-Sep-08 |     | Y    | NA   | C   | 8   | NA   | 1-Dec-14  | 7   | 7    |
| 41   | 2-Dec-14  | 5-Dec-14  | F   | 5-Mar-07  |     | Y    | NA   | C   | 8   | NA   | 5-Dec-14  | 7   | 15   |
| 42   | 8-Dec-14  | 11-Dec-14 | M   | 19-Mar-10 |     | Y    | NA   | C   | 8   | NA   | 11-Dec-14 | 8   | 11   |
| 43   | 9-Dec-14  | 12-Dec-14 | F   | 23-Jul-09 |     | Y    | NA   | C   | 8   | NA   | 12-Dec-14 | 8   | 45   |
| 44   | 15-Dec-14 | 18-Dec-14 | M   | 1-Dec-12  |     | Y    | NA   | C   | 8   | NA   | 18-Dec-14 | 7   | 10   |
| 45   | 16-Dec-14 | 19-Dec-14 | F   | 16-Jul-13 |     | Y    | NA   | C   | 8   | NA   | 19-Dec-14 | 11  | 28   |
| 46   | 17-Dec-14 | 20-Dec-14 | F   | 2-Apr-10  |     | Y    | NA   | C   | 8   | NA   | 20-Dec-14 | 8   | 39   |

|    |           |           |   |           |      |    |   |   |    |           |    |    |
|----|-----------|-----------|---|-----------|------|----|---|---|----|-----------|----|----|
| 47 | 18-Dec-14 | 21-Dec-14 | M | 30-Jun-11 | Y    | NA | C | 8 | NA | 21-Dec-14 | 6  | 37 |
| 48 | 18-Dec-14 | 21-Dec-14 | F | 20-May-03 | Y    | NA | C | 8 | NA | 21-Dec-14 | 7  | 5  |
| 49 | 22-Dec-14 | 25-Dec-14 | M | 15-Jun-90 | Y    | NA | C | 8 | NA | 25-Dec-14 | 7  | 35 |
| 50 | 22-Dec-14 | 25-Dec-14 | M | 20-Mar-12 | Y    | NA | C | 8 | NA | 25-Dec-14 | 8  | 0  |
| 51 | 22-Dec-14 | 25-Dec-14 | M | 2-Oct-07  | Y    | NA | C | 8 | NA | 25-Dec-14 | 6  | 58 |
| 52 | 22-Dec-14 | 25-Dec-14 | F | 13-Nov-99 | Y    | NA | C | 8 | NA | 25-Dec-14 | 8  | 58 |
| 53 | 22-Dec-14 | 25-Dec-14 | F | 8-Jun-13  | Y    | NA | C | 8 | NA | 25-Dec-14 | 7  | 50 |
| 54 | 22-Dec-14 | 25-Dec-14 | M | 9-May-08  | Y    | NA | C | 8 | NA | 25-Dec-14 | 8  | 4  |
| 55 | 23-Dec-14 | 26-Dec-14 | F | 8-Jun-97  | Y    | NA | C | 8 | NA | 26-Dec-14 | 10 | 3  |
| 56 | 23-Dec-14 | 26-Dec-14 | F | 12-Jan-83 | Y    | NA | C | 8 | NA | 26-Dec-14 | 7  | 44 |
| 57 | 23-Dec-14 | 26-Dec-14 | M | 4-May-04  | Y    | NA | C | 8 | NA | 26-Dec-14 | 8  | 5  |
| 58 | 29-Dec-14 | 1-Jan-15  | F | 10-Nov-04 | Y    | NA | C | 8 | NA | 1-Jan-15  | 7  | 54 |
| 59 | 29-Dec-14 | 1-Jan-15  | M | 5-Aug-08  | Y    | NA | C | 8 | NA | 1-Jan-15  | 8  | 45 |
| 60 | 30-Dec-14 | 2-Jan-15  | F | 18-Dec-04 | 10 Y | NA | C | 8 | NA | 2-Jan-15  | 8  | 15 |
| 61 | 30-Dec-14 | 2-Jan-15  | F | 15-Jun-65 | Y    | NA | C | 8 | NA | 2-Jan-15  | 9  | 10 |
| 62 | 30-Dec-14 | 2-Jan-15  | F | 15-Jun-03 | Y    | NA | C | 8 | NA | 2-Jan-15  | 9  | 15 |
| 63 | 5-Jan-15  | 8-Jan-15  | M | 25-Dec-12 | Y    | NA | C | 8 | NA | 8-Jan-15  | 9  | 35 |
| 64 | 5-Jan-15  | 8-Jan-15  | F | 17-Feb-10 | Y    | NA | C | 8 | NA | 8-Jan-15  | 9  | 6  |
| 65 | 5-Jan-15  | 8-Jan-15  | M | 29-Apr-12 | Y    | NA | C | 8 | NA | 8-Jan-15  | 8  | 6  |
| 66 | 6-Jan-15  | 9-Jan-15  | F | 18-Sep-06 | Y    | NA | C | 8 | NA | 9-Jan-15  | 8  | 15 |
| 67 | 6-Jan-15  | 9-Jan-15  | M | 11-Dec-13 | Y    | NA | C | 8 | NA | 9-Jan-15  | 9  | 15 |
| 68 | 6-Jan-15  | 9-Jan-15  | F | 6-Jul-07  | Y    | NA | C | 8 | NA | 9-Jan-15  | 8  | 46 |
| 69 | 12-Jan-15 | 15-Jan-15 | F | 23-Jul-07 | 7 Y  | NA | C | 8 | NA | 15-Jan-15 | 9  | 10 |
| 70 | 12-Jan-15 | 15-Jan-15 | F | 26-Jan-48 | 66 Y | NA | C | 8 | NA | 15-Jan-15 | 9  | 0  |
| 71 | 12-Jan-15 | 15-Jan-15 | F | 10-Apr-99 | 15 Y | NA | C | 8 | NA | 15-Jan-15 | 9  | 13 |
| 72 | 20-Jan-15 | 23-Jan-15 | F | 15-Jun-49 | 65 Y | NA | C | 8 | NA | 20-Jan-15 | 8  | 55 |
| 73 | 26-Jan-15 | 29-Jan-15 | F | 29-Sep-04 | 10 Y | NA | C | 8 | NA | 26-Jan-15 | 8  | 25 |
| 74 | 26-Jan-15 | 29-Jan-15 | M | 10-Apr-73 | 41 Y | NA | C | 8 | NA | 29-Jan-15 | 6  | 50 |
| 75 | 26-Jan-15 | 29-Jan-15 | F | 17-Nov-09 | 5 Y  | NA | C | 8 | NA | 29-Jan-15 | 7  | 17 |
| 76 | 2-Feb-15  | 5-Feb-15  | F | 19-Aug-10 | 4    | NA | C | 8 | NA | 5-Feb-15  | 10 | 45 |
| 77 | 2-Feb-15  | 5-Feb-15  | F | 13-Jan-11 | 3 Y  | NA | C | 8 | NA | 5-Feb-15  | 8  | 30 |
| 78 | 20-Jan-15 | 23-Jan-15 | F | 18-Jun-04 | 10 Y | NA | C | 8 | NA | 23-Jan-15 | 7  | 15 |
| 79 | 16-Dec-14 | 19-Dec-14 | M | 20-Jul-70 | Y    | NA | C | 8 | NA | 19-Dec-14 | 11 | 0  |
| 80 | 14-Sep-15 | 17-Sep-15 | M | 15-Apr-82 |      | NA | C | 8 | NA | 17-Sep-15 | 6  | 30 |
| 81 | 14-Sep-15 | 17-Sep-15 | M | 13-Jul-91 |      | NA | C | 8 | NA | 17-Sep-15 | 6  | 10 |
| 82 | 14-Sep-15 | 17-Sep-15 | F | 9-Nov-06  |      | NA | C | 8 | NA | 17-Sep-15 | 6  | 53 |
| 83 | 14-Sep-15 | 17-Sep-15 | F | 19-Jan-07 |      | NA | C | 8 | NA | 17-Sep-15 | 8  | 27 |
| 84 | 8-Sep-15  | 11-Sep-15 | M | 26-Mar-09 |      | NA | C | 8 | NA | 11-Sep-15 | 7  | 43 |
| 85 | 8-Sep-15  | 11-Sep-15 | F | 24-Mar-03 |      | NA | C | 8 | NA | 11-Sep-15 | 6  | 33 |
| 86 | 8-Sep-15  | 11-Sep-15 | M | 28-Jan-14 |      | NA | C | 8 | NA | 11-Sep-15 | 8  | 5  |
| 87 | 8-Sep-15  | 11-Sep-15 | F | 6-Mar-09  |      | NA | C | 8 | NA | 11-Sep-15 | 7  | 19 |
| 88 | 8-Sep-15  | 11-Sep-15 | F | 15-Aug-98 |      | NA | C | 8 | NA | 11-Sep-15 | 7  | 1  |
| 89 | 8-Sep-15  | 11-Sep-15 | F | 20-Feb-14 |      | NA | C | 8 | NA | 11-Sep-15 | 8  | 40 |
| 90 | 8-Sep-15  | 11-Sep-15 | M | 20-Feb-14 | 1 Y  | NA | C | 8 | NA | 11-Sep-15 | 8  | 54 |
| 91 | 8-Sep-15  | 11-Sep-15 | F | 21-Oct-07 |      | NA | C | 8 | NA | 11-Sep-15 | 6  | 40 |
| 92 | 8-Sep-15  | 11-Sep-15 | F | 9-Oct-12  |      | NA | C | 8 | NA | 11-Sep-15 | 7  | 32 |
| 93 | 8-Sep-15  | 11-Sep-15 | F | 15-Jun-92 |      | NA | C | 8 | NA | 11-Sep-15 | 7  | 7  |

|     |           |           |   |           |      |    |   |   |    |           |    |    |
|-----|-----------|-----------|---|-----------|------|----|---|---|----|-----------|----|----|
| 94  | 7-Sep-15  | 10-Sep-15 | F | 15-Jun-55 |      | NA | C | 8 | NA | 10-Sep-15 | 7  | 50 |
| 95  | 7-Sep-15  | 10-Sep-15 | F | 23-Mar-12 |      | NA | C | 8 | NA | 10-Sep-15 | 7  | 34 |
| 96  | 7-Sep-15  | 10-Sep-15 | F | 16-Nov-66 |      | NA | C | 8 | NA | 10-Sep-15 | 9  | 15 |
| 97  | 7-Sep-15  | 10-Sep-15 | F | 15-Apr-36 |      | NA | C | 8 | NA | 10-Sep-15 | 10 | 30 |
| 98  | 3-Nov-15  | 6-Nov-15  | F | 11-Jan-10 |      | NA | C | 8 | NA | 6-Nov-15  | 9  | 21 |
| 99  | 3-Nov-15  | 6-Nov-15  | M | 23-Dec-05 |      | NA | C | 8 | NA | 6-Nov-15  | 7  | 5  |
| 100 | 3-Nov-15  | 6-Nov-15  | F | 12-Feb-07 |      | NA | C | 8 | NA | 6-Nov-15  | 7  | 48 |
| 101 | 3-Nov-15  | 6-Nov-15  | M | 7-Oct-08  |      | NA | C | 8 | NA | 6-Nov-15  | 8  | 7  |
| 102 | 3-Nov-15  | 6-Nov-15  | M | 25-Jun-13 |      | NA | C | 8 | NA | 6-Nov-15  | 6  | 36 |
| 103 | 3-Nov-15  | 6-Nov-15  | M | 15-Mar-13 |      | NA | C | 8 | NA | 6-Nov-15  | 7  | 30 |
| 104 | 3-Nov-15  | 6-Nov-15  | F | 26-Jan-10 |      | NA | C | 8 | NA | 6-Nov-15  | 7  | 18 |
| 105 | 3-Nov-15  | 6-Nov-15  | F | 30-Sep-11 |      | NA | C | 8 | NA | 6-Nov-15  | 6  | 5  |
| 106 | 3-Nov-15  | 6-Nov-15  | M | 4-Oct-09  |      | NA | C | 8 | NA | 6-Nov-15  | 10 | 5  |
| 107 | 3-Nov-15  | 6-Nov-15  | F | 8-Jan-02  |      | NA | C | 8 | NA | 6-Nov-15  | 8  | 55 |
| 108 | 3-Nov-15  | 6-Nov-15  | F | 15-Jun-80 |      | NA | C | 8 | NA | 6-Nov-15  | 8  | 20 |
| 109 | 3-Nov-15  | 6-Nov-15  | F | 26-Apr-09 |      | NA | C | 8 | NA | 6-Nov-15  | 7  | 10 |
| 110 | 3-Nov-15  | 6-Nov-15  | M | 15-Jun-96 |      | NA | C | 8 | NA | 6-Nov-15  | 6  | 31 |
| 111 | 2-Nov-15  | 5-Nov-15  | F | 15-Jun-95 | Y    | NA | C | 8 | NA | 5-Nov-15  | 11 | 5  |
| 112 | 2-Nov-15  | 5-Nov-15  | F | 26-Jul-14 |      | NA | C | 8 | NA | 5-Nov-15  | 8  | 38 |
| 113 | 2-Nov-15  | 5-Nov-15  | F | 22-Jul-09 |      | NA | C | 8 | NA | 5-Nov-15  | 9  | 20 |
| 114 | 2-Nov-15  | 5-Nov-15  | F | 15-Jul-10 |      | NA | C | 8 | NA | 5-Nov-15  | 7  | 42 |
| 115 | 2-Nov-15  | 5-Nov-15  | F | 11-Jan-11 |      | NA | C | 8 | NA | 5-Nov-15  | 8  | 38 |
| 116 | 2-Nov-15  | 5-Nov-15  | F | 18-Feb-09 |      | NA | C | 8 | NA | 5-Nov-15  | 7  | 22 |
| 117 | 2-Nov-15  | 5-Nov-15  | M | 14-Feb-12 |      | NA | C | 8 | NA | 5-Nov-15  | 8  | 8  |
| 118 | 2-Nov-15  | 5-Nov-15  | M | 24-Mar-12 |      | NA | C | 8 | NA | 5-Nov-15  | 8  | 30 |
| 119 | 2-Nov-15  | 5-Nov-15  | M | 23-Sep-12 |      | NA | C | 8 | NA | 5-Nov-15  | 7  | 8  |
| 120 | 2-Nov-15  | 5-Nov-15  | F | 16-Mar-06 |      | NA | C | 8 | NA | 5-Nov-15  | 6  | 20 |
| 121 | 2-Nov-15  | 5-Nov-15  | F | 1-May-87  |      | NA | C | 8 | NA | 5-Nov-15  | 7  | 10 |
| 122 | 2-Nov-15  | 5-Nov-15  | F | 10-Dec-35 |      | NA | C | 8 | NA | 5-Nov-15  | 6  | 50 |
| 123 | 27-Oct-15 | 30-Oct-15 | M | 19-Mar-14 |      | NA | C | 8 | NA | 30-Oct-15 | 8  | 30 |
| 124 | 27-Oct-15 | 30-Oct-15 | F | 19-Mar-13 |      | NA | C | 8 | NA | 30-Oct-15 | 7  | 44 |
| 125 | 7-Sep-15  | 10-Sep-15 | M | 21-Aug-08 |      | NA | C | 8 | NA | 10-Sep-15 | 8  | 43 |
| 126 | 7-Sep-15  | 10-Sep-15 | F | 12-Jul-08 |      | NA | C | 8 | NA | 10-Sep-15 | 7  | 2  |
| 127 | 7-Sep-15  | 10-Sep-15 | F | 8-Feb-10  |      | NA | C | 8 | NA | 10-Sep-15 | 8  | 23 |
| 128 | 7-Sep-15  | 10-Sep-15 | M | 11-Jul-11 |      | NA | C | 8 | NA | 10-Sep-15 | 6  | 45 |
| 129 | 7-Sep-15  | 10-Sep-15 | M | 15-Dec-11 |      | NA | C | 8 | NA | 10-Sep-15 | 7  | 45 |
| 130 | 7-Sep-15  | 10-Sep-15 | F | 15-Jan-13 |      | NA | C | 8 | NA | 10-Sep-15 | 8  | 5  |
| 131 | 7-Sep-15  | 10-Sep-15 | M | 11-Aug-11 |      | NA | C | 8 | NA | 10-Sep-15 | 7  | 11 |
| 132 | 1-Sep-15  | 4-Sep-15  | F | 11-Mar-64 |      | NA | C | 8 | NA | 4-Sep-15  | 6  | 30 |
| 133 | 1-Sep-15  | 4-Sep-15  | M | 15-Jun-65 |      | NA | C | 8 | NA | 4-Sep-15  | 8  | 30 |
| 134 | 1-Sep-15  | 4-Sep-15  | M | 24-Oct-10 |      | NA | C | 8 | NA | 4-Sep-15  | 6  | 55 |
| 135 | 1-Sep-15  | 4-Sep-15  | M | 9-Aug-57  | 58 Y | NA | C | 8 | NA | 4-Sep-15  | 9  | 30 |
| 136 | 1-Sep-15  | 4-Sep-15  | M | 19-Mar-79 |      | NA | C | 8 | NA | 4-Sep-15  | 7  | 26 |
| 137 | 1-Sep-15  | 4-Sep-15  | M | 2-Mar-11  |      | NA | C | 8 | NA | 4-Sep-15  | 6  | 51 |
| 138 | 1-Sep-15  | 4-Sep-15  | F | 6-May-11  |      | NA | C | 8 | NA | 4-Sep-15  | 8  | 0  |
| 139 | 1-Sep-15  | 4-Sep-15  | M | 11-Jul-41 |      | NA | C | 8 | NA | 4-Sep-15  | 6  | 28 |
| 140 | 31-Aug-15 | 3-Sep-15  | F | 1-Jul-98  |      | NA | C | 8 | NA | 3-Sep-15  | 8  | 0  |

|     |           |           |   |           |      |    |   |   |    |           |    |    |
|-----|-----------|-----------|---|-----------|------|----|---|---|----|-----------|----|----|
| 141 | 31-Aug-15 | 3-Sep-15  | M | 6-May-01  |      | NA | C | 8 | NA | 3-Sep-15  | 7  | 33 |
| 142 | 31-Aug-15 | 3-Sep-15  | M | 26-Mar-10 | 5 Y  | NA | C | 8 | NA | 3-Sep-15  | 7  | 1  |
| 143 | 31-Aug-15 | 3-Sep-15  | F | 1-Apr-12  |      | NA | C | 8 | NA | 3-Sep-15  | 6  | 27 |
| 144 | 31-Aug-15 | 3-Sep-15  | F | 4-Feb-74  | 41 Y | NA | C | 8 | NA | 3-Sep-13  | 8  | 20 |
| 145 | 1-Sep-15  | 4-Sep-15  | M | 4-Mar-14  |      | NA | C | 8 | NA | 4-Sep-15  | 7  | 41 |
| 146 | 20-Oct-15 | 23-Oct-15 | F | 21-Jun-85 |      | NA | C | 8 | NA | 23-Oct-15 | 6  | 5  |
| 147 | 19-Oct-15 | 22-Oct-15 | F | 19-Jul-13 |      | NA | C | 8 | NA | 19-Oct-15 | 8  | 10 |
| 148 | 19-Oct-15 | 22-Oct-15 | F | 4-Jul-12  |      | NA | C | 8 | NA | 22-Oct-15 | 7  | 5  |
| 149 | 19-Oct-15 | 22-Oct-15 | F | 13-Aug-11 |      | NA | C | 8 | NA | 22-Oct-15 | 8  | 53 |
| 150 | 19-Oct-15 | 22-Oct-15 | M | 1-Dec-12  |      | NA | C | 8 | NA | 22-Oct-15 | 8  | 13 |
| 151 | 19-Oct-15 | 22-Oct-15 | M | 3-Sep-13  |      | NA | C | 8 | NA | 22-Oct-15 | 8  | 33 |
| 152 | 19-Oct-15 | 22-Oct-15 | F | 16-Mar-07 |      | NA | C | 8 | NA | 22-Oct-15 | 6  | 40 |
| 153 | 19-Oct-15 | 22-Oct-15 | M | 18-Mar-12 |      | NA | C | 8 | NA | 22-Oct-15 | 6  | 27 |
| 154 | 19-Oct-15 | 22-Oct-15 | F | 3-Dec-13  |      | NA | C | 8 | NA | 22-Oct-15 | 7  | 35 |
| 155 | 19-Oct-15 | 22-Oct-15 | M | 7-Oct-12  |      | NA | C | 8 | NA | 22-Oct-15 | 2  | 27 |
| 156 | 19-Oct-15 | 22-Oct-15 | M | 12-Jan-11 |      | NA | C | 8 | NA | 22-Oct-15 | 7  | 5  |
| 157 | 19-Oct-15 | 22-Oct-15 | F | 27-Jun-12 |      | NA | C | 8 | NA | 22-Oct-15 | 6  | 32 |
| 158 | 13-Oct-15 | 16-Oct-15 | F | 25-Aug-08 |      | NA | C | 8 | NA | 16-Oct-15 | 10 | 10 |
| 159 | 13-Oct-15 | 16-Oct-15 | M | 6-Oct-04  |      | NA | C | 8 | NA | 16-Oct-15 | 6  | 20 |
| 160 | 13-Oct-15 | 16-Oct-15 | M | 18-Nov-04 |      | NA | C | 8 | NA | 16-Oct-15 | 1  | 10 |
| 161 | 13-Oct-15 | 16-Oct-15 | M | 19-Dec-09 |      | NA | C | 8 | NA | 10-Nov-15 | 1  | 25 |
| 162 | 13-Oct-15 | 16-Oct-15 | M | 6-Nov-06  |      | NA | C | 8 | NA | 16-Oct-15 | 7  | 5  |
| 163 | 13-Oct-15 | 16-Oct-15 | F | 17-Apr-06 |      | NA | C | 8 | NA | 16-Oct-15 | 7  | 25 |
| 164 | 13-Oct-15 | 16-Oct-15 | M | 16-Sep-13 |      | NA | C | 8 | NA | 16-Oct-15 | 8  | 7  |
| 165 | 13-Oct-15 | 16-Oct-15 | M | 17-May-08 |      | NA | C | 8 | NA | 16-Oct-15 | 6  | 45 |
| 166 | 13-Oct-15 | 16-Oct-15 | F | 14-Oct-07 |      | NA | C | 8 | NA | 16-Oct-15 | 8  | 28 |
| 167 | 12-Oct-15 | 15-Oct-15 | F | 3-Apr-13  |      | NA | C | 8 | NA | 15-Oct-15 | 7  | 44 |
| 168 | 12-Oct-15 | 15-Oct-15 | M | 2-Oct-07  |      | NA | C | 8 | NA | 15-Oct-15 | 6  | 45 |
| 169 | 12-Oct-15 | 15-Oct-15 | M | 29-Apr-09 |      | NA | C | 8 | NA | 15-Oct-15 | 7  | 10 |
| 170 | 12-Oct-15 | 15-Oct-15 | F | 11-Oct-11 |      | NA | C | 8 | NA | 15-Oct-15 | 8  | 9  |
| 171 | 12-Oct-15 | 15-Oct-15 | F | 12-Dec-13 |      | NA | C | 8 | NA | 15-Oct-15 | 7  | 9  |
| 172 | 12-Oct-15 | 15-Oct-15 | F | 11-Sep-09 |      | NA | C | 8 | NA | 15-Oct-15 | 7  | 29 |
| 173 | 12-Oct-15 | 15-Oct-15 | F | 6-Feb-06  |      | NA | C | 8 | NA | 12-Oct-15 | 7  | 33 |
| 174 | 12-Oct-15 | 15-Oct-15 | F | 14-Jul-12 |      | NA | C | 8 | NA |           | 6  | 53 |
| 175 | 12-Oct-15 | 15-Oct-15 | M | 28-Dec-10 |      | NA | C | 8 | NA | 15-Oct-15 | 6  | 30 |
| 176 | 28-Sep-15 | 1-Oct-15  | F | 15-Apr-62 |      | NA | C | 8 | NA | 1-Oct-15  | 6  | 20 |
| 177 | 22-Sep-15 | 25-Sep-15 | F | 13-Feb-12 |      | NA | C | 8 | NA | 25-Sep-15 | 7  | 33 |
| 178 | 22-Sep-15 | 25-Sep-15 | F | 5-Nov-13  |      | NA | C | 8 | NA | 25-Sep-15 | 6  | 36 |
| 179 | 22-Sep-15 | 25-Sep-15 | F | 3-Sep-11  |      | NA | C | 8 | NA | 25-Sep-15 | 6  | 20 |
| 180 | 22-Sep-15 | 25-Sep-15 | F | 12-Oct-14 | M    | NA | C | 8 | NA | 25-Sep-15 | 6  | 38 |
| 181 | 22-Sep-15 | 25-Sep-15 | F | 14-May-15 |      | NA | C | 8 | NA | 25-Sep-15 | 7  | 5  |
| 182 | 22-Sep-15 | 25-Sep-15 | M | 22-Feb-14 |      | NA | C | 8 | NA | 25-Sep-15 | 8  | 16 |
| 183 | 22-Sep-15 | 25-Sep-15 | F | 6-Jun-59  |      | NA | C | 8 | NA | 25-Sep-15 | 8  | 10 |
| 184 | 22-Sep-15 | 25-Sep-15 | M | 29-May-09 |      | NA | C | 8 | NA | 25-Sep-15 | 7  | 30 |
| 185 | 22-Sep-15 | 25-Sep-15 | F | 2-Jan-05  |      | NA | C | 8 | NA | 25-Sep-15 | 7  | 12 |
| 186 | 15-Sep-15 | 18-Sep-15 | F | 14-Apr-13 |      | NA | C | 8 | NA | 18-Sep-15 | 8  | 47 |
| 187 | 15-Sep-15 | 18-Sep-15 | M | 11-Jun-06 |      | NA | C | 8 | NA | 18-Sep-15 | 7  | 43 |

|     |           |           |   |           |      |    |   |   |    |           |    |    |
|-----|-----------|-----------|---|-----------|------|----|---|---|----|-----------|----|----|
| 188 | 15-Sep-15 | 18-Sep-15 | M | 31-Oct-10 |      | NA | C | 8 | NA | 18-Sep-15 | 7  | 30 |
| 189 | 15-Sep-15 | 18-Sep-15 | M | 29-Aug-11 |      | NA | C | 8 | NA | 18-Sep-15 | 8  | 22 |
| 190 | 15-Sep-15 | 18-Sep-15 | F | 8-Jun-03  |      | NA | C | 8 | NA | 18-Sep-15 | 8  | 10 |
| 191 | 15-Sep-15 | 18-Sep-15 | F | 31-Dec-05 |      | NA | C | 8 | NA | 18-Sep-15 | 10 | 1  |
| 192 | 15-Sep-15 | 18-Sep-15 | M | 22-Sep-08 |      | NA | C | 8 | NA | 18-Sep-15 | 7  | 35 |
| 193 | 15-Sep-15 | 18-Sep-15 | M | 5-Nov-11  |      | NA | C | 8 | NA | 18-Sep-15 | 7  | 1  |
| 194 | 15-Sep-15 | 18-Sep-15 | F | 4-Sep-14  |      | NA | C | 8 | NA | 18-Sep-15 | 9  | 28 |
| 195 | 15-Sep-15 | 18-Sep-15 | F | 10-Oct-06 |      | NA | C | 8 | NA | 18-Sep-15 | 9  | 15 |
| 196 | 15-Sep-15 | 18-Sep-15 | F | 4-Jul-09  |      | NA | C | 8 | NA | 18-Sep-15 | 7  | 40 |
| 197 | 14-Sep-15 | 17-Sep-15 | M | 15-Jul-09 |      | NA | C | 8 | NA | 17-Sep-15 | 6  | 43 |
| 198 | 14-Sep-15 | 17-Sep-15 | F | 29-Nov-11 |      | NA | C | 8 | NA | 17-Sep-15 | 11 | 38 |
| 199 | 14-Sep-15 | 17-Sep-15 | F | 16-Apr-12 |      | NA | C | 8 | NA | 17-Sep-15 | 7  | 30 |
| 200 | 14-Sep-15 | 17-Sep-15 | M | 1-Nov-08  |      | NA | C | 8 | NA | 17-Sep-15 | 7  | 8  |
| 201 | 14-Sep-15 | 17-Sep-15 | F | 12-Jan-10 |      | NA | C | 8 | NA | 17-Sep-15 | 7  | 30 |
| 202 | 22-Sep-15 | 25-Sep-15 | F | 11-Jan-81 | 34 Y | NA | C | 8 | NA | 25-Sep-15 | 6  | 20 |
| 203 | 31-Aug-15 | 3-Sep-15  | M | 10-Jul-07 |      | NA | C | 8 | NA | 3-Sep-15  | 8  | 35 |
| 204 | 31-Aug-15 | 3-Sep-15  | M | 27-Jun-12 |      | NA | C | 8 | NA | 3-Sep-15  | 9  | 30 |
| 205 | 31-Aug-15 | 3-Sep-15  | M | 17-Nov-11 |      | NA | C | 8 | NA | 3-Sep-15  | 8  | 46 |
| 206 | 31-Aug-15 | 3-Sep-15  | F | 21-Dec-13 |      | NA | C | 8 | NA | 3-Sep-15  | 7  | 57 |
| 207 | 31-Aug-15 | 3-Aug-15  | M | 15-Jul-63 |      | NA | C | 8 | NA | 3-Sep-15  | 8  | 11 |
| 208 | 25-Aug-15 | 28-Aug-15 | F | 28-Dec-36 |      | NA | C | 8 | NA | 28-Aug-15 | 8  | 30 |
| 209 | 25-Aug-15 | 28-Aug-15 | M | 8-Aug-07  |      | NA | C | 8 | NA | 28-Aug-15 | 7  | 3  |
| 210 | 25-Aug-15 | 28-Aug-15 | F | 9-Apr-14  |      | NA | C | 8 | NA | 28-Aug-15 | 9  | 3  |
| 211 | 25-Aug-15 | 28-Aug-15 | M | 2-May-09  |      | NA | C | 8 | NA | 28-Aug-15 | 7  | 18 |
| 212 | 25-Aug-15 | 28-Aug-15 | F | 1-Nov-37  | Y    | NA | C | 8 | NA | 28-Aug-15 | 8  | 10 |
| 213 | 25-Aug-15 | 28-Aug-15 | F | 20-Mar-07 | 8 Y  | NA | C | 8 | NA | 28-Aug-15 | 7  | 38 |
| 214 | 25-Aug-15 | 28-Aug-15 | M | 10-Aug-03 |      | NA | C | 8 | NA | 28-Aug-15 | 6  | 50 |
| 215 | 25-Aug-15 | 28-Aug-15 | M | 10-Jan-12 |      | NA | C | 8 | NA | 28-Aug-15 | 10 | 37 |
| 216 | 25-Aug-15 | 28-Aug-15 | M | 7-Jan-53  |      | NA | C | 8 | NA | 28-Aug-15 | 7  | 40 |
| 217 | 25-Aug-15 | 28-Aug-15 | F | 15-Jun-74 |      | NA | C | 8 | NA | 28-Aug-15 | 9  | 35 |
| 218 | 24-Aug-15 | 27-Aug-15 | F | 15-Jun-98 |      | NA | C | 8 | NA | 27-Aug-15 | 8  | 16 |
| 219 | 24-Aug-15 | 27-Aug-15 | M | 18-Jun-10 |      | NA | C | 8 | NA | 27-Aug-15 | 9  | 28 |
| 220 | 24-Aug-15 | 27-Aug-15 | M | 19-Mar-95 |      | NA | C | 8 | NA | 28-Aug-15 | 8  | 11 |
| 221 | 24-Aug-15 | 27-Aug-15 | M | 15-Jul-61 |      | NA | C | 8 | NA | 27-Aug-15 | 7  | 24 |
| 222 | 24-Aug-15 | 27-Aug-15 | F | 5-Jun-80  |      | NA | C | 8 | NA | 27-Aug-15 | 8  | 58 |
| 223 | 24-Aug-15 | 27-Aug-15 | F | 16-Jul-00 |      | NA | C | 8 | NA | 27-Aug-15 | 6  | 50 |
| 224 | 24-Aug-15 | 27-Aug-15 | M | 17-Oct-00 |      | NA | C | 8 | NA | 27-Aug-15 | 8  | 22 |
| 225 | 24-Aug-15 | 27-Aug-15 | M | 15-May-13 |      | NA | C | 8 | NA | 27-Aug-15 | 9  | 50 |
| 226 | 24-Aug-15 | 27-Aug-15 | F | 7-Nov-10  |      | NA | C | 8 | NA | 27-Aug-15 | 7  | 55 |
| 227 | 24-Aug-15 | 27-Aug-15 | M | 15-May-06 |      | NA | C | 8 | NA | 27-Aug-15 | 7  | 5  |
| 228 | 24-Aug-15 | 27-Aug-15 | F | 10-Jun-09 |      | NA | C | 8 | NA | 27-Aug-15 | 8  | 34 |
| 229 | 24-Aug-15 | 27-Aug-15 | M | 18-Oct-08 |      | NA | C | 8 | NA | 27-Aug-15 | 7  | 46 |
| 230 | 24-Aug-15 | 27-Aug-15 | M | 12-Feb-08 |      | NA | C | 8 | NA | 27-Aug-15 | 7  | 24 |
| 231 | 18-Aug-15 | 21-Aug-15 | F | 12-Nov-98 |      | NA | C | 8 | NA | 21-Aug-15 | 8  | 40 |
| 232 | 18-Aug-15 | 21-Aug-15 | M | 15-Aug-96 |      | NA | C | 8 | NA | 21-Aug-15 | 9  | 10 |
| 233 | 17-Aug-15 | 20-Aug-15 | M | 13-Jun-98 |      | NA | C | 8 | NA | 20-Aug-15 | 7  | 0  |
| 234 | 17-Aug-15 | 20-Aug-15 | F | 9-Dec-06  |      | NA | C | 8 | NA | 20-Aug-15 | 8  | 20 |

|     |           |             |           |    |   |      |           |    |    |
|-----|-----------|-------------|-----------|----|---|------|-----------|----|----|
| 235 | 17-Aug-15 | 20-Aug-15 F | 1-Jan-06  | NA | C | 8 NA | 20-Aug-15 | 7  | 35 |
| 236 | 17-Aug-15 | 20-Aug-15 M | 21-Jun-13 | NA | C | 8 NA | 20-Aug-15 | 7  | 57 |
| 237 | 17-Aug-15 | 20-Aug-15 F | 2-Jun-11  | NA | C | 8 NA | 20-Aug-15 | 7  | 42 |
| 238 | 17-Aug-15 | 20-Aug-15 M | 6-Nov-08  | NA | C | 8 NA | 20-Aug-15 | 6  | 48 |
| 239 | 6-Oct-15  | 9-Oct-15 F  | 30-Dec-10 | NA | C | 8 NA | 9-Oct-15  | 7  | 24 |
| 240 | 6-Oct-15  | 9-Oct-15 M  | 12-Jul-04 | NA | C | 8 NA | 9-Oct-15  | 8  | 28 |
| 241 | 6-Oct-15  | 9-Oct-15 F  | 22-Jan-07 | NA | C | 8 NA | 9-Oct-15  | 6  | 38 |
| 242 | 6-Oct-15  | 9-Oct-15 M  | 31-Aug-04 | NA | C | 8 NA | 9-Oct-15  | 7  | 41 |
| 243 | 6-Oct-15  | 9-Oct-15 M  | 21-Aug-06 | NA | C | 8 NA | 9-Oct-15  | 7  | 58 |
| 244 | 5-Oct-15  | 8-Oct-15 M  | 17-Apr-54 | NA | C | 8 NA | 2-Nov-15  | 12 | 30 |
| 245 | 6-Oct-15  | 9-Oct-15 M  | 8-Jul-10  | NA | C | 8 NA | 9-Oct-15  | 6  | 16 |
| 246 | 5-Oct-15  | 8-Oct-15 M  | 7-Nov-11  | NA | C | 8 NA | 8-Oct-15  | 6  | 51 |
| 247 | 5-Oct-15  | 8-Oct-15 F  | 2-Apr-07  | NA | C | 8 NA | 8-Oct-15  | 7  | 10 |
| 248 | 5-Oct-15  | 8-Oct-15 F  | 11-Apr-07 | NA | C | 8 NA | 8-Oct-15  | 7  | 53 |
| 249 | 5-Oct-15  | 8-Oct-15 M  | 30-Sep-09 | NA | C | 8 NA | 8-Oct-15  | 8  | 11 |
| 250 | 5-Oct-15  | 8-Oct-15 M  | 11-Jun-12 | NA | C | 8 NA | 8-Oct-15  | 8  | 45 |
| 251 | 5-Oct-15  | 8-Oct-15 F  | 3-Jul-11  | NA | C | 8 NA | 8-Oct-15  | 7  | 15 |
| 252 | 29-Sep-15 | 2-Oct-15 M  | 25-Oct-13 | NA | C | 8 NA | 2-Oct-15  | 7  | 51 |
| 253 | 29-Sep-15 | 2-Oct-15 M  | 3-Jan-13  | NA | C | 8 NA | 2-Oct-15  | 6  | 1  |
| 254 | 29-Sep-15 | 2-Oct-15 F  | 24-Mar-05 | NA | C | 8 NA | 2-Oct-15  | 6  | 54 |
| 255 | 29-Sep-15 | 2-Oct-15 M  | 1-Dec-08  | NA | C | 8 NA | 2-Oct-15  | 7  | 9  |
| 256 | 29-Sep-15 | 2-Oct-15 F  | 10-Aug-10 | NA | C | 8 NA | 2-Oct-15  | 7  | 27 |
| 257 | 29-Sep-15 | 2-Oct-15 F  | 15-Jun-58 | NA | C | 8 NA | 2-Oct-15  | 7  | 10 |
| 258 | 29-Sep-15 | 2-Oct-15 M  | 29-Jan-02 | NA | C | 8 NA | 2-Oct-15  | 7  | 49 |
| 259 | 29-Sep-15 | 2-Oct-15 F  | 13-Jun-02 | NA | C | 8 NA | 2-Oct-15  | 6  | 30 |
| 260 | 29-Sep-15 | 2-Oct-15 M  | 14-Jan-11 | NA | C | 8 NA | 2-Oct-14  | 6  | 41 |
| 261 | 28-Sep-15 | 1-Oct-15 M  | 15-Feb-12 | NA | C | 8 NA | 1-Oct-15  | 7  | 18 |
| 262 | 28-Sep-15 | 1-Oct-15 M  | 16-Feb-14 | NA | C | 8 NA | 1-Oct-15  | 6  | 56 |
| 263 | 28-Sep-15 | 1-Oct-15 F  | 5-Sep-13  | NA | C | 8 NA | 1-Oct-15  | 7  | 32 |
| 264 | 28-Sep-15 | 1-Oct-15 M  | 15-Oct-13 | NA | C | 8 NA | 1-Oct-15  | 8  | 14 |
| 265 | 28-Sep-15 | 1-Oct-15 F  | 15-Dec-11 | NA | C | 8 NA | 1-Oct-15  | 6  | 34 |
| 266 | 28-Sep-15 | 1-Oct-15 F  | 16-Mar-11 | NA | C | 8 NA | 1-Oct-15  | 8  | 5  |
| 267 | 28-Sep-15 | 1-Oct-15 M  | 8-Nov-05  | NA | C | 8 NA | 1-Oct-15  | 7  | 30 |
| 268 | 28-Sep-15 | 1-Sep-15 M  | 7-Jun-13  | NA | C | 8 NA | 1-Oct-15  | 6  | 43 |
| 269 | 28-Sep-15 | 1-Oct-15 M  | 21-Jun-11 | NA | C | 8 NA | 1-Oct-15  | 8  | 37 |
| 270 | 27-Oct-15 | 30-Oct-15 F | 20-Aug-07 | NA | C | 8 NA | 30-Oct-15 | 6  | 40 |
| 271 | 27-Oct-15 | 30-Oct-15 M | 21-Sep-08 | NA | C | 8 NA | 30-Oct-15 | 8  | 33 |
| 272 | 27-Oct-15 | 30-Oct-15 M | 17-Apr-09 | NA | C | 8 NA | 30-Oct-15 | 6  | 28 |
| 273 | 27-Oct-15 | 30-Oct-15 F | 12-Jun-08 | NA | C | 8 NA | 30-Oct-15 | 8  | 9  |
| 274 | 27-Oct-15 | 30-Oct-15 M | 29-Jun-13 | NA | C | 8 NA | 30-Oct-15 | 8  | 54 |
| 275 | 27-Oct-15 | 30-Oct-15 M | 30-Nov-07 | NA | C | 8 NA | 30-Oct-15 | 7  | 0  |
| 276 | 27-Oct-15 | 30-Oct-15 M | 10-Jun-11 | NA | C | 8 NA | 30-Oct-15 | 6  | 15 |
| 277 | 27-Oct-15 | 30-Oct-15 F | 1-Jul-08  | NA | C | 8 NA | 30-Oct-15 | 12 | 13 |
| 278 | 27-Oct-15 | 30-Oct-15 M | 31-Jul-11 | NA | C | 8 NA | 30-Oct-15 | 7  | 10 |
| 279 | 26-Oct-15 | 29-Oct-15 F | 26-Dec-11 | NA | C | 8 NA | 29-Oct-15 | 1  | 30 |
| 280 | 26-Oct-15 | 29-Oct-15 M | 8-Apr-10  | NA | C | 8 NA | 29-Oct-15 | 7  | 53 |
| 281 | 26-Oct-15 | 29-Oct-15 F | 19-May-13 | NA | C | 8 NA | 29-Oct-15 | 7  | 2  |

|     |           |           |   |           |    |   |   |    |           |    |    |
|-----|-----------|-----------|---|-----------|----|---|---|----|-----------|----|----|
| 282 | 26-Oct-15 | 29-Oct-15 | M | 13-Nov-13 | NA | C | 8 | NA | 29-Oct-15 | 7  | 20 |
| 283 | 26-Oct-15 | 29-Oct-15 | M | 7-Dec-13  | NA | C | 8 | NA | 29-Oct-15 | 6  | 30 |
| 284 | 26-Oct-15 | 29-Oct-15 | M | 27-Jul-10 | NA | C | 8 | NA | 29-Oct-15 | 9  | 20 |
| 285 | 26-Oct-15 | 29-Oct-15 | F | 29-Oct-09 | NA | C | 8 | NA | 29-Oct-15 | 7  | 9  |
| 286 | 26-Oct-15 | 29-Oct-15 | F | 11-Jan-12 | NA | C | 8 | NA | 29-Oct-15 | 8  | 50 |
| 287 | 26-Oct-15 | 29-Oct-15 | M | 25-May-12 | NA | C | 8 | NA | 29-Oct-15 | 8  | 0  |
| 288 | 26-Oct-15 | 29-Oct-15 | F | 3-Aug-10  | NA | C | 8 | NA | 29-Oct-15 | 7  | 25 |
| 289 | 26-Oct-15 | 29-Oct-15 | F | 31-Oct-13 | NA | C | 8 | NA | 29-Oct-15 | 6  | 48 |
| 290 | 26-Oct-15 | 29-Oct-15 | F | 14-Jun-10 | NA | C | 8 | NA | 29-Oct-15 | 6  | 21 |
| 291 | 26-Oct-15 | 29-Oct-15 | M | 1-Mar-12  | NA | C | 8 | NA | 29-Oct-15 | 8  | 19 |
| 292 | 20-Oct-15 | 23-Oct-15 | F | 18-Apr-12 | NA | C | 8 | NA | 23-Oct-15 | 9  | 11 |
| 293 | 20-Oct-15 | 23-Oct-15 | F | 3-Dec-08  | NA | C | 8 | NA | 23-Oct-15 | 6  | 41 |
| 294 | 20-Oct-15 | 23-Oct-15 | M | 5-Jun-02  | NA | C | 8 | NA | 23-Oct-15 |    |    |
| 295 | 20-Oct-15 | 23-Oct-15 | M | 2-Jan-14  | NA | C | 8 | NA | 23-Oct-15 | 6  | 6  |
| 296 | 20-Oct-15 | 23-Oct-15 | F | 7-Apr-10  | NA | C | 8 | NA | 23-Oct-15 | 7  | 32 |
| 297 | 20-Oct-15 | 23-Oct-15 | M | 9-Jul-07  | NA | C | 8 | NA | 23-Oct-15 | 8  | 19 |
| 298 | 20-Oct-15 | 23-Oct-15 | F | 22-May-04 | NA | C | 8 | NA | 23-Oct-15 | 10 | 10 |
| 299 | 20-Oct-15 | 23-Oct-15 | F | 17-May-03 | NA | C | 8 | NA | 23-Oct-15 | 7  | 10 |

[illegible]

DUO-COTECXIN  
DUO-CTECXIN  
DUO-COTECXIN  
DUO-COECSIN  
DUO-COTECXIN  
DUO-COTECXIN  
DUO-COTECXIN  
DUO-COTECXIN DIHYDRTEMISININ PIPERAQUINE  
DUO-COTECXIN  
DUO-COTECXIN  
DUO-COTECXIN



[illegible]

[illegible]

[illegible]

[illegible]

[illegible]

[illegible]

| q24a                             | q25f | q25f1 | q25f2 | q25f3 | q26s | q26s1 | q26s2 | q26s3 | q27n | q27n1 |
|----------------------------------|------|-------|-------|-------|------|-------|-------|-------|------|-------|
| DIHYDROARTEMISININ PIPERAQUINE   | N    | 8     | 88    | 88    | 88   | 88    | 8     | 8     | 2    | 88    |
| DIHYDROARTEMISININ PIPERAQUINE   | N    | 8     | 88    | 88    | 88   | 88    | 8     | 8     | 2    | 88    |
| DIHYDROARTEMISIN PIPERAQUINE     | N    | 8     | 88    | 88    | 88   | 88    | 8     | 8     | 3    | 88    |
| DIHYDROARTEMISININ PIPERAQUINE   | N    | 8     | 88    | 88    | 88   | 88    | 8     | 8     | 3    | 88    |
| DIHYDROARTEMISININ PIPERAQUINE   | N    | 8     | 88    | 88    | 88   | 88    | 8     | 8     | 2    | 88    |
| DIHYDROARTEMISININ PIPERAQUINE   | N    | 8     | 88    | 88    | 88   | 88    | 8     | 8     | 2    | 88    |
| DIHDROARTEMISININ PIPERAQUINE    | N    | 8     | 88    | 88    | 88   | 88    | 8     | 8     | 1    | 88    |
| DIHYDROARTEMISININ PIPERAQUINE   | N    | 8     | 88    | 88    | 88   | 88    | 8     | 8     | 1    | 88    |
| DIHDROARTEMISININ PIPERAQUINE    | N    | 8     | 88    | 88    | 88   | 88    | 8     | 8     | 2    | 88    |
| DIHYDROARTEMISININ PIPERAQUINE   | N    | 8     | 88    | 88    | 88   | 88    | 8     | 8     | 2    | 88    |
| DIHYDROARTEMISININ PIPERAQUINE   | N    | 8     | 88    | 88    | 88   | 88    | 8     | 8     | 3    | 88    |
| DIHYDRARTEMISININ/PIPERAQUINE    | N    | 8     | 88    | 88    | 88   | 88    | 8     | 8     | 2    | 88    |
| DIHYDROARTEMISININ/PIPERAQUINE   | N    | 8     | 88    | 88    | 88   | 88    | 8     | 8     | 1    | 88    |
| DIHYDRARTEMISININ PIPERAQUINE    | N    | 8     | 88    | 88    | 88   | 88    | 8     | 8     | 1    | 88    |
| DIHYDRARTEMISININ/PIPERAQUINE    | Y    | 8     | 88    | 88    | 88   | 88    | 8     | 8     | 2    | 88    |
| DIHYDROARTEMISININ/PIPERAQUINE   | N    | 8     | 88    | 88    | 88   | 88    | 8     | 8     | 3    | 88    |
| DIHYDROARTEMISININ/PIPERAQUINE   | N    | 8     | 88    | 88    | 88   | 88    | 8     | 8     | 3    | 88    |
| DIHYDROARTEMISININ PIPERAQUINE   | N    | 8     | 88    | 88    | 88   | 88    | 8     | 8     | 3    | 88    |
| DIHYDROARTEMISININ/PIPERAQUINE   | Y    | 8     | 88    | 88    | 88   | 88 Y  |       | 8     | 1    | 88    |
| DIHYDROARTEMISININ/PIPERAQUINE   | N    | 8     | 88    | 88    | 88   | 88    | 8     | 8     | 2    | 88    |
| DIHYDROARTEMISININ/PIPERAQUINE   | N    | 8     | 88    | 88    | 88   | 88 N  |       | 8     | 2    | 88    |
| DIHYDROARTEMISININ/PIPERAQUINE   | N    | 8     | 88    | 88    | 88   | 88 N  |       | 8     | 1    | 88    |
| DIHYDROABTEMISININ/PIPERAQUINE   | N    | 8     | 88    | 88    | 88   | 88 N  |       | 8     | 2    | 88    |
| DIHYDROARTEMISININ/PIPERAQUINE   | N    | 8     | 88    | 88    | 88   | 88    | 8     | 8     | 3    | 88    |
| DIHYDROARTEMISININ PIPERAQUINE   | N    | 8     | 88    | 88    | 88   | 88    | 8     | 8     | 3    | 88    |
| DIHYDROARTEMISININ PIPERAQUINE   | N    | 8     | 88    | 88    | 88   | 88    | 8     | 8     | 2    | 88    |
| DIHYDROARTEMISININ PIPERAQUINE   | N    | 8     | 88    | 88    | 88   | 88    | 8     | 8     | 1    | 88    |
| DIHYDROABTEMISININ/PIPERAQUINE   | N    | 8     | 88    | 88    | 88   | 88    | 8     | 8     | 2    | 88    |
| DIHYDROARTEMISININ PIPERAQUINE   | N    | 8     | 88    | 88    | 88   | 88    | 8     | 8     | 0    | 88    |
| DIHYDROARTEMISININ PIPERAQUINE   | N    | 8     | 88    | 88    | 88   | 88    | 8     | 8     | 1    | 88    |
| DIHYDROARTEMISININ PIPERAQUINE   | N    | 8     | 88    | 88    | 3    | 88 N  |       | 8     | 3    | 88    |
| (DIHYDROARTEMISININ PIPERAQUINE) | N    | 8     | 88    | 88    | 88   | 88    | 8     | 8     | 2    | 88    |
| DIHYDROARTEMISININ PIPERAQUINE   | N    | 8     | 88    | 88    | 88   | 88 N  |       | 8     | 1    | 88    |
| (DIHYDROARTEMISININ PIPERAQUINE) | N    | 8     | 88    | 88    | 88   | 88 Y  |       | 8     | 1    | 88    |
| DIHYDROARTEMISININ PIPERAQUINE   | N    | 8     | 88    | 88    | 88   | 88 Y  |       | 8     | 1    | 88    |
| DIHYDROARTEMISININ PIPERAQUINE   | N    | 8     | 88    | 88    | 88   | 88 Y  |       | 8     | 1    | 88    |
| (DIHYDROABTEMISININ PIPERAQUINE) | N    | 8     | 88    | 88    | 88   | 88 N  |       | 8     | 1    | 88    |
| DIHYDROARTEMISININ PIPERAQUINE   | N    | 8     | 88    | 88    | 88   | 88 N  |       | 8     | 1    | 88    |
| DIHYDROABTEMISININ PIPERAQUINE   | N    | 8     | 88    | 88    | 88   | 88 Y  |       | 8     | 1    | 88    |
| (DIHYDROARTEMISININ PIPERAQUINE) | N    | 8     | 88    | 88    | 88   | 88 Y  |       | 8     | 1    | 88    |
| DIHYDROARTEMISININ PIPERAQUINE   | N    | 8     | 88    | 88    | 88   | 88    | 8     | 8     | 1    | 88    |
| DIHYDROARTEMISININ PIPERAQUINE   | N    | 8     | 88    | 88    | 88   | 88 Y  |       | 8     | 1    | 88    |
|                                  | N    | 8     | 88    | 88    | 88   | 88 Y  |       | 8     | 1    | 88    |
| DIHYDROARTEMISININ PIPERAQUINE   | N    | 8     | 88    | 88    | 88   | 88 N  |       | 8     | 2    | 88    |
| DIHYDROARTEMISININ PIPERAQUINE   | N    | 8     | 88    | 88    | 88   | 88    | 8     | 8     | 1    | 88    |
| DIHYDROARTEMISININ PIPERAQUINE   | N    | 8     | 88    | 88    | 88   | 88    | 8     | 8     | 1    | 88    |

[illegible]



[illegible]

[illegible]

[illegible]

[illegible]

|                                |   |   |    |    |    |      |   |   |    |
|--------------------------------|---|---|----|----|----|------|---|---|----|
| DIHYDROARTEMISININ PIPERAQUINE | N | 8 | 88 | 88 | 88 | 88 N | 8 | 1 | 88 |
| DIHYDROARTEMISININ PIPERAQUINE | N | 8 | 88 | 88 | 88 | 88 N | 8 | 2 | 88 |
| DIHYDROARTEMISININ PIPERAQUINE | N | 8 | 88 | 88 | 88 | 88 N | 8 | 2 | 88 |
| DIHYDROARTEMISININ PIPERAQUINE | N | 8 | 88 | 88 | 88 | 88 N | 8 | 2 | 88 |
| DIHYDROARTEMISININ PIPERAQUINE | N | 8 | 88 | 88 | 88 | 88 N | 8 | 2 | 88 |
| DIHYDROARTEMISININ PIPERAQUINE | N | 8 | 88 | 88 | 88 | 88 N | 8 | 2 | 88 |
| DIHYDROARTEMISININ PIPERAQUINE | N | 8 | 88 | 88 | 88 | 88 N | 8 | 2 | 88 |
| DIHYDROARTEMISININ PIPERAQUINE | N | 8 | 88 | 88 | 88 | 88 N | 8 | 2 | 88 |
| DIHYDROARTEMISININ PIPERAQUINE | N | 8 | 88 | 88 | 88 | 88 N | 8 | 2 | 88 |
| DIHYDROARTEMISININ PIPERAQUINE | N | 8 | 88 | 88 | 88 | 88 N | 8 | 2 | 88 |
| DIHYDROARTEMISININ PIPERAQUINE | Y | 8 | 88 | 88 | 88 | 88 N | 8 | 1 | 88 |
| DIHYDROARTEMISININ PIPERAQUINE | N | 8 | 88 | 88 | 88 | 88 N | 8 | 2 | 88 |
| DIHYDROARTEMISININ PIPERAQUINE | N | 8 | 88 | 88 | 88 | 88 N | 8 | 2 | 88 |
| DIHYDROARTEMISININ PIPERAQUINE | N | 8 | 88 | 88 | 88 | 88 N | 8 | 1 | 88 |
| DIHYDROARTEMISININ PIPERAQUINE | N | 8 | 88 | 88 | 88 | 88 N | 8 | 2 | 88 |
| DIHYDROARTEMISININ PIPERAQUINE | N | 8 | 88 | 88 | 88 | 88 N | 8 | 2 | 88 |
| DIHYDROARTEMISININ PIPERAQUINE | N | 8 | 88 | 88 | 88 | 88 N | 8 | 2 | 88 |
| DIHYDROARTEMISININ PIPERAQUINE | N | 8 | 88 | 88 | 88 | 88 N | 8 | 2 | 88 |

| q27n2 | q27n3 | q28t | q28t1 | q28t2 | q28t3 | q29t | q29t1 | q29t2 | q29t3 | q30t | q30t1 | q30t2 | q30t3 | q31v | q31v1 |
|-------|-------|------|-------|-------|-------|------|-------|-------|-------|------|-------|-------|-------|------|-------|
| 88    | 88    | Ev   | 88    | 88    | 88    | Ye   | 88    | 88    | 88    | No   | 88    | 88    | 88    | No   | 88    |
| 88    | 88    | Af   | 88    | 88    | 88    | Ye   | 88    | 88    | 88    | No   | 88    | 88    | 88    | No   | 88    |
| 88    | 88    | Ev   | 88    | 88    | 88    | Ye   | 88    | 88    | 88    | No   | 88    | 88    | 88    | No   | 88    |
| 88    | 88    | Af   | 88    | 88    | 88    | Ye   | 88    | 88    | 88    | No   | 88    | 88    | 88    | No   | 88    |
| 88    | 88    | Af   | 88    | 88    | 88    | Ye   | 88    | 88    | 88    | No   | 88    | 88    | 88    | Ye   | 88    |
| 88    | 88    | Ev   | 88    | 88    | 88    | Ye   | 88    | 88    | 88    | No   | 88    | 88    | 88    | No   | 88    |
| 1     | 88    | Ev   | 88    | Ev    |       | 88   | Ye    | 88    | Ye    |      | 88    | No    | 88    | No   | 88    |
| 88    | 88    | Ev   | 88    | 88    | 88    | Ye   | 88    | 88    | 88    | No   | 88    | 88    | 88    | No   | 88    |
| 88    | 88    | Af   | 88    | 88    | 88    | Ye   | 88    | 88    | 88    | No   | 88    | 88    | 88    | Ye   | 88    |
| 88    | 88    | Ev   | 88    | 88    | 88    | Ye   | 88    | 88    | 88    | No   | 88    | 88    | 88    | No   | 88    |
| 88    | 88    | Ev   | 88    | 88    | 88    | Ye   | 88    | 88    | 88    | No   | 88    | 88    | 88    | No   | 88    |
| 88    | 88    | Ev   | 88    | 88    | 88    | Ye   | 88    | 88    | 88    | No   | 88    | 88    | 88    | No   | 88    |
| 88    | 88    | Ev   | 88    | 88    | 88    | Ye   | 88    | 88    | 88    | No   | 88    | 88    | 88    | No   | 88    |
| 88    | 88    | Ev   | 88    | 88    | 88    | Ye   | 88    | 88    | 88    | No   | 88    | 88    | 88    | No   | 88    |
| 88    | 88    | Af   | 88    | 88    | 88    | Ye   | 88    | 88    | 88    | No   | 88    | 88    | 88    | No   | 88    |
| 88    | 88    | Af   | 88    | 88    | 88    | Ye   | 88    | 88    | 88    | Ye   | 88    | 88    | 88    | No   | 88    |
| 88    | 88    | Ev   | 88    | 88    | 88    | Ye   | 88    | 88    | 88    | No   | 88    | 88    | 88    | No   | 88    |
| 88    | 88    | Ev   | 88    | 88    | 88    | Ye   | 88    | 88    | 88    | No   | 88    | 88    | 88    | No   | 88    |
| 1     | 88    | Af   | 88    | Ev    |       | 88   | Ye    | 88    | Ye    |      | 88    | No    | 88    | No   | 88    |
| 88    | 88    | Ev   | 88    | 88    | 88    | Ye   | 88    | 88    | 88    | No   | 88    | 88    | 88    | No   | 88    |
| 88    | 88    | Ev   | 88    | 88    | 88    | Ye   | 88    | 88    | 88    | No   | 88    | 88    | 88    | No   | 88    |
| 88    | 88    | Ev   | 88    | 88    | 88    | Ye   | 88    | 88    | 88    | No   | 88    | 88    | 88    | No   | 88    |
| 88    | 88    | Ev   | 88    | 88    | 88    | Ye   | 88    | 88    | 88    | No   | 88    | 88    | 88    | No   | 88    |
| 88    | 88    | Ev   | 88    | 88    | 88    | Ye   | 88    | 88    | 88    | No   | 88    | 88    | 88    | No   | 88    |
| 88    | 88    | Ev   | 88    | 88    | 88    | Ye   | 88    | 88    | 88    | No   | 88    | 88    | 88    | No   | 88    |
| 88    | 88    | Ev   | 88    | 88    | 88    | Ye   | 88    | 88    | 88    | No   | 88    | 88    | 88    | No   | 88    |
| 88    | 88    | Af   | 88    | 88    | 88    | Ye   | 88    | 88    | 88    | No   | 88    | 88    | 88    | No   | 88    |
| 88    | 88    | Ev   | 88    | 88    | 88    | Ye   | 88    | 88    | 88    | No   | 88    | 88    | 88    | No   | 88    |
| 88    | 88    | 88   | 88    | 88    | 88    | 88   | 88    | 88    | 88    | 88   | 88    | 88    | 88    | 88   | 88    |
| 88    | 88    | Af   | 88    | 88    | 88    | Ye   | 88    | 88    | 88    | No   | 88    | 88    | 88    | No   | 88    |
| 88    | 88    | Ev   | 88    | 88    | 88    | Ye   | 88    | 88    | 88    | Do   | 88    | 88    | 88    | No   | 88    |
| 88    | 88    | Af   | 88    | 88    | 88    | Ye   | 88    | 88    | 88    | No   | 88    | 88    | 88    | No   | 88    |
| 88    | 88    | Ev   | 88    | 88    | 88    | Ye   | 88    | 88    | 88    | No   | 88    | 88    | 88    | Ye   | 88    |
| 1     | 88    | Mo   | 88    | Ev    |       | 88   | Ye    | 88    | Ye    |      | 88    | No    | 88    | No   | 88    |
| 1     | 88    | Mo   | 88    | Ev    |       | 88   | Ye    | 88    | Ye    |      | 88    | No    | 88    | No   | 88    |
| 1     | 88    | Af   | 88    | Ev    |       | 88   | Ye    | 88    | Ye    |      | 88    | No    | 88    | No   | 88    |
| 88    |       |      |       |       |       |      |       |       |       |      |       |       |       |      |       |

|   |    |    |  |    |    |  |    |    |  |    |  |
|---|----|----|--|----|----|--|----|----|--|----|--|
|   | Af |    |  | Ye |    |  | No |    |  | No |  |
|   | Mo |    |  | Ye |    |  | Ye |    |  | No |  |
|   | Mo |    |  | Ye |    |  | No |    |  | No |  |
|   | 88 |    |  | 88 |    |  | 88 |    |  | 88 |  |
|   | Ev |    |  | Ye |    |  | No |    |  | No |  |
|   | Ev |    |  | Ye |    |  | No |    |  | No |  |
|   | Ev |    |  | Ye |    |  | No |    |  | No |  |
|   | Ev |    |  | Ye |    |  | No |    |  | No |  |
|   | Ev |    |  | Ye |    |  | No |    |  | Ye |  |
|   | Ev |    |  | Ye |    |  | No |    |  | No |  |
|   | Ev |    |  | Ye |    |  | No |    |  | No |  |
|   | Mo |    |  | Ye |    |  | No |    |  | No |  |
|   | Ev |    |  | Ye |    |  | No |    |  | No |  |
|   | Mo |    |  | Ye |    |  | No |    |  | No |  |
|   | Ev |    |  | Ye |    |  | No |    |  | No |  |
|   | Mo |    |  | Ye |    |  | No |    |  | No |  |
|   | Ev |    |  | Ye |    |  | Ye |    |  | Ye |  |
|   | Ev |    |  | Ye |    |  | No |    |  | No |  |
|   | Ev |    |  | Ye |    |  | Ye |    |  | No |  |
| 1 | Mo | Ev |  | Ye | Ye |  | No | No |  | No |  |
|   | Ev |    |  | Ye |    |  | Ye |    |  | Ye |  |
|   | Ev |    |  | Ye |    |  | No |    |  | Ye |  |
|   | Ev |    |  | Ye |    |  | No |    |  | No |  |
|   | Ev |    |  | Ye |    |  | No |    |  | No |  |
|   | Ev |    |  | Ye |    |  | No |    |  | No |  |
|   | Mo |    |  | Ye |    |  | No |    |  | No |  |
|   | Mo |    |  | Ye |    |  | No |    |  | No |  |
|   | Ev |    |  | Ye |    |  | No |    |  | No |  |
|   | Ev |    |  | Ye |    |  | No |    |  | Ye |  |
|   | Mo |    |  | Ye |    |  | Ye |    |  | No |  |
| 1 | Mo | Ev |  | Ye | Ye |  | No | No |  | No |  |
|   | Mo |    |  | Ye |    |  | No |    |  | No |  |
|   | Ev |    |  | Ye |    |  | Ye |    |  | Ye |  |
|   | Ev |    |  | Ye |    |  | Ye |    |  | Ye |  |
|   | Af |    |  | Ye |    |  | No |    |  | No |  |
|   | Af |    |  | Ye |    |  | No |    |  | No |  |
|   | Af |    |  | Ye |    |  | No |    |  | No |  |
|   | Mo |    |  | Ye |    |  | No |    |  | No |  |
|   | Ev |    |  | Ye |    |  | No |    |  | Ye |  |
|   | Ev |    |  | Ye |    |  | No |    |  | No |  |
|   | Mo |    |  | Ye |    |  | Ye |    |  | No |  |
| 1 | Mo | Ev |  | Ye | Ye |  | No | No |  | No |  |
|   | Mo |    |  | Ye |    |  | No |    |  | No |  |
|   | Ev |    |  | Ye |    |  | Ye |    |  | Ye |  |
|   | Ev |    |  | Ye |    |  | Ye |    |  | Ye |  |
|   | Af |    |  | Ye |    |  | No |    |  | No |  |
|   | Af |    |  | Ye |    |  | No |    |  | No |  |
|   | Af |    |  | Ye |    |  | No |    |  | No |  |

[illegible]



[illegible]

[illegible]

[illegible]

|    |       |       |    |       |       |    |       |       |    |       |    |
|----|-------|-------|----|-------|-------|----|-------|-------|----|-------|----|
| 88 | 88 Af | 88    | 88 | 88 Ye | 88    | 88 | 88 Ye | 88    | 88 | 88 No | 88 |
| 88 | 88 Mo | 88    | 88 | 88 Ye | 88    | 88 | 88 No | 88    | 88 | 88 No | 88 |
| 88 | 88 Ev | 88    | 88 | 88 Ye | 88    | 88 | 88 No | 88    | 88 | 88 No | 88 |
| 88 | 88 Af | 88    | 88 | 88 Ye | 88    | 88 | 88 No | 88    | 88 | 88 No | 88 |
| 88 | 88 Af | 88    | 88 | 88 Ye | 88    | 88 | 88 No | 88    | 88 | 88 No | 88 |
| 88 | 88 Af | 88    | 88 | 88 Ye | 88    | 88 | 88 No | 88    | 88 | 88 No | 88 |
| 88 | 88 Af | 88    | 88 | 88 Ye | 88    | 88 | 88 No | 88    | 88 | 88 No | 88 |
| 88 | 88 Ev | 88    | 88 | 88 Ye | 88    | 88 | 88 Ye | 88    | 88 | 88 No | 88 |
| 88 | 88 Af | 88    | 88 | 88 Ye | 88    | 88 | 88 No | 88    | 88 | 88 No | 88 |
| 88 | 88 Af | 88    | 88 | 88 Ye | 88    | 88 | 88 No | 88    | 88 | 88 No | 88 |
| 1  | 88 Af | 88 Ev |    | 88 Ye | 88 Ye |    | 88 No | 88 No |    | 88 Ye | 88 |
| 88 | 88 Ev | 88    | 88 | 88 Ye | 88    | 88 | 88 No | 88    | 88 | 88 No | 88 |
| 88 | 88 Ev | 88    | 88 | 88 Ye | 88    | 88 | 88 No | 88    | 88 | 88 Ye | 88 |
| 88 | 88 Ev | 88    | 88 | 88 Ye | 88    | 88 | 88 No | 88    | 88 | 88 Ye | 88 |
| 88 | 88 Ev | 88    | 88 | 88 Ye | 88    | 88 | 88 No | 88    | 88 | 88 No | 88 |
| 88 | 88 Ev | 88    | 88 | 88 Ye | 88    | 88 | 88 No | 88    | 88 | 88 No | 88 |
| 88 | 88 Mo | 88    | 88 | 88 Ye | 88    | 88 | 88 No | 88    | 88 | 88 No | 88 |
| 88 | 88 Ev | 88    | 88 | 88 Ye | 88    | 88 | 88 No | 88    | 88 | 88 No | 88 |

[illegible]

[illegible]

[illegible]

[illegible]



[illegible]

[illegible]

|    |    |    |    |    |    |    |    |    |    |    |    |    |    |    |    |    |    |    |
|----|----|----|----|----|----|----|----|----|----|----|----|----|----|----|----|----|----|----|
|    | 88 | 88 | 88 | 88 | 88 | 88 | 88 | 88 | 88 | 88 | NA | NA | NA | NA |    |    |    |    |
|    | 88 | 88 | 88 | 88 | 88 | 88 | 88 | 88 | 88 | 88 | NA | NA | NA | NA |    |    |    |    |
|    | 88 | 88 | 88 | 88 | 88 | 88 | 88 | 88 | 88 | 88 | NA | NA | NA | NA |    |    |    |    |
|    | 88 | 88 | 88 | 88 | 88 | 88 | 88 | 88 | 88 | 88 | NA | NA | NA | NA |    |    |    |    |
|    | 88 | 88 | 88 | 88 | 88 | 88 | 88 | 88 | 88 | 88 | NA | NA | NA | NA |    |    |    |    |
|    | 88 | 88 | 88 | 88 | 88 | 88 | 88 | 88 | 88 | 88 | NA | NA | NA | NA |    |    |    |    |
|    | 88 | 88 | 88 | 88 | 88 | 88 | 88 | 88 | 88 | 88 | NA | NA | NA | NA |    |    |    |    |
|    | 88 | 88 | 88 | 88 | 88 | 88 | 88 | 88 | 88 | 88 | NA | NA | NA | NA |    |    |    |    |
|    | 88 | 88 | 88 | 88 | 88 | 88 | 88 | 88 | 88 | 88 | NA | NA | NA | NA |    |    |    |    |
|    | 88 | 88 | 88 | 88 | 88 | 88 | 88 | 88 | 88 | 88 | NA | NA | NA | NA |    |    |    |    |
| Ye |    | 88 | No |    | 88 | No |    | 88 | 88 | 88 | 88 | 88 | 88 | 88 | NA | NA | NA | NA |
|    | 88 | 88 | 88 | 88 | 88 | 88 | 88 | 88 | 88 | 88 | 88 | NA | NA | NA | NA | NA | NA |    |
|    | 88 | 88 | No |    | 88 | 88 | 88 | 88 | 88 | 88 | 88 | NA | NA | NA | NA | NA | NA |    |
|    | 88 | 88 | No |    | 88 | 88 | 88 | 88 | 88 | 88 | 88 | NA | NA | NA | NA | NA | NA |    |
|    | 88 | 88 | 88 | 88 | 88 | 88 | 88 | 88 | 88 | 88 | 88 | NA | NA | NA | NA | NA | NA |    |
|    | 88 | 88 | 88 | 88 | 88 | 88 | 88 | 88 | 88 | 88 | 88 | NA | NA | NA | NA | NA | NA |    |
|    | 88 | 88 | 88 | 88 | 88 | 88 | 88 | 88 | 88 | 88 | 88 | NA | NA | NA | NA | NA | NA |    |
|    | 88 | 88 | 88 | 88 | 88 | 88 | 88 | 88 | 88 | 88 | 88 | NA | NA | NA | NA | NA | NA |    |

| q33other             | q33other1 | q33other2 | q33other3 | q34 | q35i | q35i1 | q35i2 | q35i3 | q36d | q36d1 |
|----------------------|-----------|-----------|-----------|-----|------|-------|-------|-------|------|-------|
| NA                   | NA        | NA        | NA        | 88  | Mo   | NA    | NA    | NA    | Y    | 8     |
| NA                   | NA        | NA        | NA        | 88  | Ot   | NA    | NA    | NA    | Y    | 8     |
| NA                   | NA        | NA        | NA        | 88  | NA   | NA    | NA    | NA    | Y    | 8     |
| NA                   | NA        | NA        | NA        | 88  | NA   | NA    | NA    | NA    | Y    | 8     |
| NA                   | NA        | NA        | NA        | 88  | Fa   | NA    | NA    | NA    | Y    | 8     |
| NA                   | NA        | NA        | NA        | 88  | Mo   | NA    | NA    | NA    | Y    | 8     |
| NA                   | NA        | NA        | NA        | 88  | Fa   | NA    | Fa    | NA    | Y    | 8     |
| NA                   | NA        | NA        | NA        | 88  | Fa   | NA    | NA    | NA    | Y    | 8     |
| NA                   | NA        | NA        | NA        | 88  | Mo   | NA    | NA    | NA    | Y    | 8     |
| NA                   | NA        | NA        | NA        | 88  | Mo   | NA    | NA    | NA    | Y    | 8     |
| NA                   | NA        | NA        | NA        | 88  | NA   | NA    | NA    | NA    | Y    | 8     |
| NA                   | NA        | NA        | NA        | 88  | Mo   | NA    | NA    | NA    | Y    | 8     |
| NA                   | NA        | NA        | NA        | 88  | Fa   | NA    | NA    | NA    | Y    | 8     |
| NA                   | NA        | NA        | NA        | 88  | Mo   | NA    | NA    | NA    | Y    | 8     |
| NA                   | NA        | NA        | NA        | 88  | NA   | NA    | NA    | NA    | Y    | 8     |
| NA                   | NA        | NA        | NA        | 88  | NA   | NA    | NA    | NA    | Y    | 8     |
| NA                   | NA        | NA        | NA        | 88  | NA   | NA    | NA    | NA    | Y    | 8     |
| NA                   | NA        | NA        | NA        | 88  | NA   | NA    | NA    | NA    | Y    | 8     |
| NA                   | NA        | NA        | NA        | 88  | Mo   | NA    | NA    | NA    | Y    | 8     |
| NA                   | NA        | NA        | NA        | 88  | Mo   | NA    | NA    | NA    | Y    | 8     |
| NA                   | NA        | NA        | NA        | 88  | Mo   | NA    | NA    | NA    | Y    | 8     |
| NA                   | NA        | NA        | NA        | 88  | Mo   | NA    | NA    | NA    | Y    | 8     |
| NA                   | NA        | NA        | NA        | 88  | Mo   | NA    | NA    | NA    | Y    | 8     |
| NA                   | NA        | NA        | NA        | 88  | NA   | NA    | NA    | NA    | Y    | 8     |
| NA                   | NA        | NA        | NA        | 88  | Mo   | NA    | NA    | NA    | Y    | 8     |
| NA                   | NA        | NA        | NA        | 88  | Mo   | NA    | NA    | NA    | N    | 8     |
| NA                   | NA        | NA        | NA        | 88  | Mo   | NA    | NA    | NA    | Y    | 8     |
| NA                   | NA        | NA        | NA        | 88  | NA   | NA    | NA    | NA    | N    | 8     |
| DID NOT EAT THAT DAY | NA        | NA        | NA        | 88  | NA   | NA    | NA    | NA    | Y    | 8     |
| NA                   | NA        | NA        | NA        | 88  | Mo   | NA    | NA    | NA    | Y    | 8     |
| NA                   | NA        | NA        | NA        | 88  | Ot   | NA    | NA    | NA    | Y    | 8     |
| NA                   | NA        | NA        | NA        | Ev  | Fa   | NA    | NA    | NA    | Y    | 8     |
| NA                   | NA        | NA        | NA        | 88  | Mo   | NA    | NA    | NA    | Y    | 8     |
| NA                   | NA        | NA        | NA        | 88  | NA   | NA    | NA    | NA    | Y    | 8     |
| NA                   | NA        | NA        | NA        | 88  | NA   | NA    | NA    | NA    | Y    | 8     |
| NA                   | NA        | NA        | NA        | 88  | NA   | NA    | NA    | NA    | Y    | 8     |
| NA                   | NA        | NA        | NA        | 88  | NA   | NA    | NA    | NA    | Y    | 8     |
| NA                   | NA        | NA        | NA        | 88  | Mo   | NA    | NA    | NA    | Y    | 8     |
| NA                   | NA        | NA        | NA        | 88  | Mo   | NA    | NA    | NA    | Y    | 8     |
| NA                   | NA        | NA        | NA        | 88  | Ot   | NA    | Ot    | NA    | Y    | 8     |
| NA                   | NA        | NA        | NA        | 88  | Ot   | NA    | NA    | NA    | Y    | 8     |
| NA                   | NA        | NA        | NA        | 88  | Mo   | NA    | Mo    | NA    | Y    | 8     |
| NA                   | NA        | NA        | NA        | 88  | Mo   | NA    | Mo    | NA    | N    | 8     |
| NA                   | NA        | NA        | NA        | 88  | Ot   | NA    | NA    | NA    | Y    | 8     |
| NA                   | NA        | NA        | NA        | 88  | Mo   | NA    | NA    | NA    | Y    | 8     |
| NA                   | NA        | NA        | NA        | 88  | Ot   | NA    | NA    | NA    | Y    | 8     |

[illegible]

|    |    |    |    |       |    |    |    |   |   |
|----|----|----|----|-------|----|----|----|---|---|
| NA | NA | NA | NA | 88 NA | NA | NA | NA | Y | 8 |
| NA | NA | NA | NA | 88 Ot | NA | NA | NA | Y | 8 |
| NA | NA | NA | NA | 88 NA | NA | NA | NA | Y | 8 |
| NA | NA | NA | NA | 88 NA | NA | NA | NA | N | 8 |
| NA | NA | NA | NA | Mo    | NA | NA | NA | Y | 8 |
| NA | NA | NA | NA | 88 Mo | NA | NA | NA | Y | 8 |
| NA | NA | NA | NA | 88 Mo | NA | NA | NA | Y | 8 |
| NA | NA | NA | NA | 88 Mo | NA | NA | NA | Y | 8 |
| NA | NA | NA | NA | 88 Fa | NA | NA | NA | Y | 8 |
| NA | NA | NA | NA | 88 Mo | NA | NA | NA | Y | 8 |
| NA | NA | NA | NA | 88 Mo | NA | NA | NA | Y | 8 |
| NA | NA | NA | NA | 88 Mo | NA | NA | NA | Y | 8 |
| NA | NA | NA | NA | 88 Mo |    |    |    | Y | 8 |
| NA | NA | NA | NA | 88 NA | NA | NA | NA | Y | 8 |
| NA | NA | NA | NA | 88 NA | NA | NA | NA | Y | 8 |
| NA | NA | NA | NA | 88 Mo | NA | NA | NA | Y | 8 |
| NA | NA | NA | NA | 88 NA | NA | NA | NA | Y | 8 |
| NA | NA | NA | NA | 88 NA | NA | NA | NA | Y | 8 |
| NA | NA | NA | NA | 88 NA | NA | NA | NA | Y | 8 |
| NA | NA | NA | NA | 88 Ot | NA | NA | NA | Y | 8 |
| NA | NA | NA | NA | 88 NA | NA | NA | NA | Y | 8 |
| NA | NA | NA | NA | 88 Mo | NA | NA | NA | Y | 8 |
| NA | NA | NA | NA | 88 Fa | NA | NA | NA | Y | 8 |
| NA | NA | NA | NA | 88 Mo | NA | NA | NA | Y | 8 |
| NA | NA | NA | NA | 88 Mo | NA | NA | NA | Y | 8 |
| NA | NA | NA | NA | 88 Mo | NA | NA | NA | Y | 8 |
| NA | NA | NA | NA | 88 Mo | NA | NA | NA | Y | 8 |
| NA | NA | NA | NA | 88 NA | NA | NA | NA | Y | 8 |
| NA | NA | NA | NA | 88 NA | NA | NA | NA | Y | 8 |
| NA | NA | NA | NA | 88 Mo | NA | NA | NA | Y | 8 |
| NA | NA | NA | NA | 88 Mo | NA | NA | NA | Y | 8 |
| NA | NA | NA | NA | 88 Ot | NA | NA | NA | Y | 8 |
| NA | NA | NA | NA | 88 Ot | NA | NA | NA | Y | 8 |
| NA | NA | NA | NA | 88 Mo | NA | NA | NA | Y | 8 |
| NA | NA | NA | NA | Ev Mo | NA | NA | NA | Y | 8 |
| NA | NA | NA | NA | 88 Mo | NA | NA | NA | Y | 8 |
| NA | NA | NA | NA | 88 Mo | NA | NA | NA | Y | 8 |
| NA | NA | NA | NA | 88 Mo | NA | NA | NA | Y | 8 |
| NA | NA | NA | NA | 88 NA | NA | NA | NA | Y | 8 |
| NA | NA | NA | NA | 88 NA | NA | NA | NA | Y | 8 |
| NA | NA | NA | NA | 88 NA | NA | NA | NA | Y | 8 |
| NA | NA | NA | NA | 88 Ot | NA | NA | NA | Y | 8 |
| NA | NA | NA | NA | 88 NA | NA | NA | NA | Y | 8 |
| NA | NA | NA | NA | 88 NA | NA | NA | NA | Y | 8 |
| NA | NA | NA | NA | 88 Mo | NA | NA | NA | Y | 8 |
| NA | NA | NA | NA | 88 NA | NA | NA | NA | Y | 8 |
| NA | NA | NA | NA | 88 NA | NA | NA | NA | Y | 8 |
| NA | NA | NA | NA | 88 NA | NA | NA | NA | Y | 8 |

[illegible]

|    |    |    |    |       |    |    |    |   |   |
|----|----|----|----|-------|----|----|----|---|---|
| NA | NA | NA | NA | 88 Mo | NA | NA | NA | Y | 8 |
| NA | NA | NA | NA | 88 Mo | NA | NA | NA | Y | 8 |
| NA | NA | NA | NA | 88 Mo | NA | NA | NA | Y | 8 |
| NA | NA | NA | NA | 88 Mo | NA | NA | NA | Y | 8 |
| NA | NA | NA | NA | 88 Mo | NA | NA | NA | Y | 8 |
| NA | NA | NA | NA | 88 Ot | NA | NA | NA | Y | 8 |
| NA | NA | NA | NA | 88 Mo | NA | NA | NA | Y | 8 |
| NA | NA | NA | NA | 88 Mo | NA | NA | NA | Y | 8 |
| NA | NA | NA | NA | 88 Mo | NA | NA | NA | Y | 8 |
| NA | NA | NA | NA | 88 Mo | NA | NA | NA | Y | 8 |
| NA | NA | NA | NA | 88 Mo | NA | NA | NA | Y | 8 |
| NA | NA | NA | NA | No Mo | NA | NA | NA | Y | 8 |
| NA | NA | NA | NA | 88 Mo | NA | NA | NA | Y | 8 |
| NA | NA | NA | NA | 88 Mo | NA | NA | NA | Y | 8 |
| NA | NA | NA | NA | 88 NA | NA | NA | NA | Y | 8 |
| NA | NA | NA | NA | 88 Mo | NA | NA | NA | Y | 8 |
| NA | NA | NA | NA | 88 Fa | NA | NA | NA | Y | 8 |
| NA | NA | NA | NA | 88 Mo | NA | NA | NA | Y | 8 |
| NA | NA | NA | NA | 88 Mo | NA | NA | NA | Y | 8 |
| NA | NA | NA | NA | 88 NA | NA | NA | NA | Y | 8 |
| NA | NA | NA | NA | 88 NA | NA | NA | NA | Y | 8 |
| NA | NA | NA | NA | 88 Mo | NA | NA | NA | Y | 8 |
| NA | NA | NA | NA | 88 Mo | NA | NA | NA | Y | 8 |
| NA | NA | NA | NA | 88 Mo | NA | NA | NA | Y | 8 |
| NA | NA | NA | NA | 88 NA | NA | NA | NA | Y | 8 |
| NA | NA | NA | NA | 88 Mo | NA | NA | NA | Y | 8 |
| NA | NA | NA | NA | 88 Mo | NA | NA | NA | Y | 8 |
| NA | NA | NA | NA | 88 FA | NA | NA | NA | Y | 8 |
| NA | NA | NA | NA | 88 NA | NA | NA | NA | Y | 8 |
| NA | NA | NA | NA | 88 NA | NA | NA | NA | Y | 8 |
| NA | NA | NA | NA | 88 NA | NA | NA | NA | Y | 8 |
| NA | NA | NA | NA | 88 Mo | NA | NA | NA | Y | 8 |
| NA | NA | NA | NA | 88 NA | NA | NA | NA | Y | 8 |
| NA | NA | NA | NA | 88 NA | NA | NA | NA | Y | 8 |
| NA | NA | NA | NA | 88 Na | NA | NA | NA | Y | 8 |
| NA | NA | NA | NA | 88 Ot | NA | NA | NA | Y | 8 |
| NA | NA | NA | NA | 88 Mo | NA | NA | NA | Y | 8 |
| NA | NA | NA | NA | 88 Mo | NA | NA | NA | Y | 8 |
| NA | NA | NA | NA | 88 Ot | NA | NA | NA | Y | 8 |
| NA | NA | NA | NA | 88 Mo | NA | Mo | NA | Y | 8 |
| NA | NA | NA | NA | 88 NA | NA | NA | NA | Y | 8 |
| NA | NA | NA | NA | 88 NA | NA | NA | NA | Y | 8 |
| NA | NA | NA | NA | 88 Mo | NA | NA | NA | Y | 8 |



[illegible]

|    |    |    |    |       |    |    |    |   |   |
|----|----|----|----|-------|----|----|----|---|---|
| NA | NA | NA | NA | 88 Mo | NA | NA | NA | Y | 8 |
| NA | NA | NA | NA | 88 Ot | NA | NA | NA | Y | 8 |
| NA | NA | NA | NA | No Fa | NA | NA | NA | Y | 8 |
| NA | NA | NA | NA | 88 Mo | NA | NA | NA | Y | 8 |
| NA | NA | NA | NA | 88 Mo | NA | NA | NA | Y | 8 |
| NA | NA | NA | NA | 88 Mo | NA | NA | NA | Y | 8 |
| NA | NA | NA | NA | 88 Mo | NA | NA | NA | Y | 8 |
| NA | NA | NA | NA | 88 Mo | NA | NA | NA | Y | 8 |
| NA | NA | NA | NA | 88 Mo | NA | NA | NA | Y | 8 |
| NA | NA | NA | NA | 88 Mo | NA | NA | NA | Y | 8 |
| NA | NA | NA | NA | 88 Mo | NA | Mo | NA | Y | 8 |
| NA | NA | NA | NA | 88 Mo | NA | NA | NA | Y | 8 |
| NA | NA | NA | NA | 88 Mo | NA | NA | NA | Y | 8 |
| NA | NA | NA | NA | 88 Mo | NA | NA | NA | Y | 8 |
| NA | NA | NA | NA | 88 Mo | NA | NA | NA | Y | 8 |
| NA | NA | NA | NA | 88 Ot | NA | NA | NA | Y | 8 |
| NA | NA | NA | NA | 88 Mo | NA | NA | NA | Y | 8 |
| NA | NA | NA | NA | 88 Mo | NA | NA | NA | Y | 8 |



[illegible]

[illegible]

[illegible]

[illegible]

[illegible]



[illegible]

| q37other2 | q37other3 | q38h | q38h1 | q38h2 | q38h3 | q39t  | q39t1 | q39t2 | q39t3 | q40t | q40t1 | q40t2 | q40t3 |
|-----------|-----------|------|-------|-------|-------|-------|-------|-------|-------|------|-------|-------|-------|
| NA        | NA        | 2    | 88    | 88    |       | 88 Ev | 88    | 88    | 88 Ye |      | 88    | 88    | 88    |
| NA        | NA        | 2    | 88    | 88    |       | 88 Af | 88    | 88    | 88 Ye |      | 88    | 88    | 88    |
| NA        | NA        | 3    | 88    | 88    |       | 88 Ev | 88    | 88    | 88 Ye |      | 88    | 88    | 88    |
| NA        | NA        | 3    | 88    | 88    |       | 88 Mo | 88    | 88    | 88 Ye |      | 88    | 88    | 88    |
| NA        | NA        | 2    | 88    | 88    |       | 88 Mo | 88    | 88    | 88 Ye |      | 88    | 88    | 88    |
| NA        | NA        | 2    | 88    | 88    |       | 88 Ev | 88    | 88    | 88 Ye |      | 88    | 88    | 88    |
| NA        | NA        | 1    | 88    | 1     |       | 88 Mo | 88 Ev |       | 88 Ye |      | 88 Ye |       | 88    |
| NA        | NA        | 1    | 88    | 1     |       | 88 Mo | 88    | 88    | 88 No |      | 88    | 88    | 88    |
| NA        | NA        | 2    | 88    | 88    |       | 88 Mo | 88    | 88    | 88 Ye |      | 88    | 88    | 88    |
| NA        | NA        | 2    | 88    | 88    |       | 88 Ev | 88    | 88    | 88 Ye |      | 88    | 88    | 88    |
| NA        | NA        | 3    | 88    | 88    |       | 88 Mo | 88    | 88    | 88 Ye |      | 88    | 88    | 88    |
| NA        | NA        | 2    | 88    | 88    |       | 88 Ev | 88    | 88    | 88 Ye |      | 88    | 88    | 88    |
| NA        | NA        | 1    | 88    | 1     |       | 88 Mo | 88 Ev |       | 88 Ye |      | 88 Ye |       | 88    |
| NA        | NA        | 1    | 88    | 1     |       | 88 Mo | 88 Ev |       | 88 Ye |      | 88 Ye |       | 88    |
| NA        | NA        | 88   | 88    | 88    |       | 88 Af | 88    | 88    | 88 Ye |      | 88    | 88    | 88    |
| NA        | NA        | 3    | 88    | 88    |       | 88 Mo | 88    | 88    | 88 Ye |      | 88    | 88    | 88    |
| NA        | NA        | 3    | 88    | 88    |       | 88 Ev | 88    | 88    | 88 Ye |      | 88    | 88    | 88    |
| NA        | NA        | 3    | 88    | 88    |       | 88 Ev | 88    | 88    | 88 Ye |      | 88    | 88    | 88    |
| NA        | NA        | 1    | 88    | 1     |       | 88 Mo | 88 Ev |       | 88 Ye |      | 88 Ye |       | 88    |
| NA        | NA        | 2    | 88    | 88    |       | 88 Ev | 88    | 88    | 88 Ye |      | 88    | 88    | 88    |
| NA        | NA        | 2    | 88    | 88    |       | 88 Ev | 88    | 88    | 88 Ye |      | 88    | 88    | 88    |
| NA        | NA        | 1    | 88    | 1     |       | 88 Mo | 88 Ev |       | 88 Ye |      | 88 Ye |       | 88    |
| NA        | NA        | 2    | 88    | 88    |       | 88 Ev | 88    | 88    | 88 Ye |      | 88    | 88    | 88    |
| NA        | NA        | 3    | 88    | 88    |       | 88 Ev | 88    | 88    | 88 Ye |      | 88    | 88    | 88    |
| NA        | NA        | 3    | 88    | 88    |       | 88 Ev | 88    | 88    | 88 Ye |      | 88    | 88    | 88    |
| NA        | NA        | 2    | 88    | 88    |       | 88 Ev | 88    | 88    | 88 Ye |      | 88    | 88    | 88    |
| NA        | NA        | 1    | 88    | 88    |       | 88 Af | 88    | 88    | 88 Ye |      | 88    | 88    | 88    |
| NA        | NA        | 88   | 88    | 88    |       | 88 88 | 88    | 88    | 88 88 |      | 88    | 88    | 88    |
| NA        | NA        | 1    | 88    | 88    |       | 88 Mo | 88    | 88    | 88 Ye |      | 88    | 88    | 88    |
| NA        | NA        | 1    | 88    | 88    |       | 88 Af | 88    | 88    | 88 Ye |      | 88    | 88    | 88    |
| NA        | NA        | 2    | 88    | 88    |       | 88 Mo | 88    | 88    | 88 Ye |      | 88    | 88    | 88    |
| NA        | NA        | 2    | 88    | 88    |       | 88 Mo | 88    | 88    | 88 Ye |      | 88    | 88    | 88    |
| NA        | NA        | 1    | 88    | 88    |       | 88 Ev | 88    | 88    | 88 Ye |      | 88    | 88    | 88    |
| NA        | NA        | 1    | 88    | 1     |       | 88 Mo | 88 Ev |       | 88 Ye |      | 88 Ye |       | 88    |
| NA        | NA        | 1    | 88    | 1     |       | 88 Mo | 88 Ev |       | 88 Ye |      | 88 Ye |       | 88    |
| NA        | NA        | 1    | 88    | 1     |       | 88 Mo | 88 Ev |       | 88 Ye |      | 88 Ye |       | 88    |
| NA        | NA        | 1    | 88    | 1     |       | 88 Mo | 88 Ev |       | 88 Ye |      | 88 Ye |       | 88    |
| NA        | NA        | 1    | 88    | 1     |       | 88 Mo | 88 Ev |       | 88 Ye |      | 88 Ye |       | 88    |
| NA        | NA        | 1    | 88    | 1     |       | 88 Mo | 88 Ev |       | 88 Ye |      | 88 Ye |       | 88    |
| NA        | NA        | 1    | 88    | 1     |       | 88 Mo | 88 Ev |       | 88 Ye |      | 88 Ye |       | 88    |
| NA        | NA        | 1    | 88    | 1     |       | 88 Mo | 88 Ev |       | 88 Ye |      | 88 Ye |       | 88    |
| NA        | NA        | 88   | 88    | 88    |       | 88 88 | 88    | 88    | 88 88 |      | 88    | 88    | 88    |
| NA        | NA        | 2    | 88    | 88    |       | 88 Ev | 88    | 88    | 88 Ye |      | 88    | 88    | 88    |
| NA        | NA        | 1    | 88    | 88    |       | 88 Mo | 88    | 88    | 88 Ye |      | 88    | 88    | 88    |
| NA        | NA        | 1    | 88    | 1     |       | 88 Mo | 88 Ev |       | 88 Ye |      | 88 Ye |       | 88    |

[illegible]

[illegible]

[illegible]

[illegible]

[illegible]

|    |    |   |    |    |       |       |    |       |       |    |    |
|----|----|---|----|----|-------|-------|----|-------|-------|----|----|
| NA | NA | 1 | 88 | 88 | 88 Mo | 88    | 88 | 88 Ye | 88    | 88 | 88 |
| NA | NA | 2 | 88 | 88 | 88 Mo | 88    | 88 | 88 Ye | 88    | 88 | 88 |
| NA | NA | 2 | 88 | 88 | 88 Mo | 88    | 88 | 88 Ye | 88    | 88 | 88 |
| NA | NA | 2 | 88 | 88 | 88 Af | 88    | 88 | 88 Ye | 88    | 88 | 88 |
| NA | NA | 2 | 88 | 88 | 88 Mo | 88    | 88 | 88 Ye | 88    | 88 | 88 |
| NA | NA | 2 | 88 | 88 | 88 Mo | 88    | 88 | 88 Ye | 88    | 88 | 88 |
| NA | NA | 2 | 88 | 88 | 88 Mo | 88    | 88 | 88 Ye | 88    | 88 | 88 |
| NA | NA | 2 | 88 | 88 | 88 Mo | 88    | 88 | 88 Ye | 88    | 88 | 88 |
| NA | NA | 2 | 88 | 88 | 88 Mo | 88    | 88 | 88 Ye | 88    | 88 | 88 |
| NA | NA | 2 | 88 | 88 | 88 Mo | 88    | 88 | 88 Ye | 88    | 88 | 88 |
| NA | NA | 1 | 88 | 1  | 88 Mo | 88 Ev |    | 88 Ye | 88 Ye |    | 88 |
| NA | NA | 2 | 88 | 88 | 88 Mo | 88    | 88 | 88 Ye | 88    | 88 | 88 |
| NA | NA | 2 | 88 | 88 | 88 Mo | 88    | 88 | 88 Ye | 88    | 88 | 88 |
| NA | NA | 1 | 88 | 88 | 88 Mo | 88    | 88 | 88 Ye | 88    | 88 | 88 |
| NA | NA | 2 | 88 | 88 | 88 Ev | 88    | 88 | 88 Ye | 88    | 88 | 88 |
| NA | NA | 2 | 88 | 88 | 88 Mo | 88    | 88 | 88 Ye | 88    | 88 | 88 |
| NA | NA | 2 | 88 | 88 | 88 Mo | 88    | 88 | 88 Ye | 88    | 88 | 88 |
| NA | NA | 2 | 88 | 88 | 88 Ev | 88    | 88 | 88 Ye | 88    | 88 | 88 |



| q41t | q41t1 | q41t2 | q41t3 | q42v | q42v1 | q42v2 | q42v3 | q43i | q43i1 | q43i2 | q43i3 | q44i | q45w | q45w1 | q45w2 |
|------|-------|-------|-------|------|-------|-------|-------|------|-------|-------|-------|------|------|-------|-------|
| No   | 88    | 88    | 88    | No   | 88    | 88    | 88    | 88   | 88    | 88    | 88    | 88   | Ye   | 88    | 88    |
| No   | 88    | 88    | 88    | No   | 88    | 88    | 88    | 88   | 88    | 88    | 88    | 88   | 4    | 88    | 88    |
| No   | 88    | 88    | 88    | No   | 88    | 88    | 88    | 88   | 88    | 88    | 88    | 88   | 88   | 88    | 88    |
| No   | 88    | No    | 88    | No   | 88    | 88    | 88    | 88   | 88    | 88    | 88    | 88   | 88   | 88    | 88    |
| No   | 88    | 88    | 88    | Ye   | 88    | 88    | 88    | No   | 88    | 88    | 88    | 88   | No   | 88    | 88    |
| No   | 88    | 88    | 88    | No   | 88    | 88    | 88    | 88   | 88    | 88    | 88    | 88   | Ye   | 88    | 88    |
| No   | 88    | No    | 88    | No   | 88    | 88    | 88    | 88   | 88    | 88    | 88    | 88   | No   | 88    | No    |
| No   | 88    | 88    | 88    | 88   | 88    | 88    | 88    | 88   | 88    | 88    | 88    | Af   | No   | 88    | No    |
| No   | 88    | 88    | 88    | Ye   | 88    | 88    | 88    | No   | 88    | 88    | 88    | Mo   | 88   | 88    | 88    |
| No   | 88    | 88    | 88    | No   | 88    | 88    | 88    | 88   | 88    | 88    | 88    | 88   | Ye   | 88    | 88    |
| No   | 88    | 88    | 88    | No   | 88    | 88    | 88    | 88   | 88    | 88    | 88    | 88   | 88   | 88    | 88    |
| No   | 88    | 88    | 88    | No   | 88    | 88    | 88    | 88   | 88    | 88    | 88    | 88   | Ye   | 88    | 88    |
| No   | 88    | No    | 88    | No   | 88    | 88    | 88    | 88   | 88    | 88    | 88    | 88   | No   | 88    | No    |
| No   | 88    | No    | 88    | No   | 88    | 88    | 88    | 88   | 88    | 88    | 88    | 88   | Ye   | 88    | Ye    |
| No   | 88    | 88    | 88    | No   | 88    | 88    | 88    | 88   | 88    | 88    | 88    | 88   | No   | 88    | 88    |
| No   | 88    | 88    | 88    | No   | 88    | 88    | 88    | 88   | 88    | 88    | 88    | 88   | 88   | 88    | 88    |
| No   | 88    | 88    | 88    | No   | 88    | 88    | 88    | 88   | 88    | 88    | 88    | 88   | 88   | 88    | 88    |
| No   | 88    | 88    | 88    | No   | 88    | 88    | 88    | 88   | 88    | 88    | 88    | 88   | 88   | 88    | 88    |
| No   | 88    | No    | 88    | No   | 88    | 88    | 88    | 88   | 88    | 88    | 88    | 88   | 88   | 88    | 88    |
| No   | 88    | 88    | 88    | No   | 88    | 88    | 88    | 88   | 88    | 88    | 88    | 88   | Ye   | 88    | 88    |
| No   | 88    | 88    | 88    | No   | 88    | 88    | 88    | 88   | 88    | 88    | 88    | 88   | Ye   | 88    | 88    |
| No   | 88    | No    | 88    | No   | 88    | No    | 88    | 88   | 88    | 88    | 88    | 88   | Ye   | 88    | Ye    |
| No   | 88    | 88    | 88    | No   | 88    | 88    | 88    | 88   | 88    | 88    | 88    | 88   | Ye   | 88    | 88    |
| No   | 88    | 88    | 88    | No   | 88    | 88    | 88    | 88   | 88    | 88    | 88    | 88   | 88   | 88    | 88    |
| No   | 88    | 88    | 88    | No   | 88    | 88    | 88    | 88   | 88    | 88    | 88    | 88   | 88   | 88    | 88    |
| No   | 88    | 88    | 88    | No   | 88    | 88    | 88    | 88   | 88    | 88    | 88    | 88   | Ye   | 88    | 88    |
| No   | 88    | 88    | 88    | No   | 88    | 88    | 88    | 88   | 88    | 88    | 88    | 88   | Ye   | 88    | 88    |
| 88   | 88    | 88    | 88    | 88   | 88    | 88    | 88    | 88   | 88    | 88    | 88    | 88   | 88   | 88    | 88    |
| No   | 88    | 88    | 88    | No   | 88    | 88    | 88    | 88   | 88    | 88    | 88    | 88   | 88   | 88    | 88    |
| Ye   | 88    | 88    | 88    | No   | 88    | 88    | 88    | 88   | 88    | 88    | 88    | 88   | Ye   | 88    | 88    |
| No   | 88    | 88    | 88    | No   | 88    | 88    | 88    | 88   | 88    | 88    | 88    | 88   | 4    | 88    | 88    |
| Ye   | 88    | 88    | 88    | Ye   | 88    | 88    | 88    | No   | 88    | 88    | 88    | 88   | No   | 88    | 88    |
| No   | 88    | 88    | 88    | No   | 88    | 88    | 88    | 88   | 88    | 88    | 88    | 88   | Ye   | 88    | 88    |
| No   | 88    | No    | 88    | No   | 88    | 88    | 88    | 88   | 88    | 88    | 88    | 88   | 88   | 88    | 88    |
| No   | 88    | No    | 88    | No   | 88    | 88    | 88    | 88   | 88    | 88    | 88    | 88   | 88   | 88    | 88    |
| No   | 88    | No    | 88    | No   | 88    | 88    | 88    | 88   | 88    | 88    | 88    | 88   | 88   | 88    | 88    |
| No   | 88    | No    | 88    | No   | 88    | 88    | 88    | 88   | 88    | 88    | 88    | 88   | Ye   | 88    | Ye    |
| No   | 88    | No    | 88    | No   | 88    | No    | 88    | 88   | 88    | 88    | 88    | 88   | Ye   | 88    | Ye    |
| No   | 88    | No    | 88    | No   | 88    | 88    | 88    | 88   | 88    | 88    | 88    | 88   | 4    | 88    | 4     |
| No   | 88    | No    | 88    | No   | 88    | 88    | 88    | 88   | 88    | 88    | 88    | 88   | 4    | 88    | 4     |
| No   | 88    | No    | 88    | No   | 88    | 88    | 88    | 88   | 88    | 88    | 88    | 88   | Ye   | 88    | Ye    |
| 88   | 88    | 88    | 88    | 88   | 88    | 88    | 88    | 88   | 88    | 88    | 88    | 88   | 88   | 88    | 88    |
| No   | 88    | 88    | 88    | No   | 88    | 88    | 88    | 88   | 88    | 88    | 88    | 88   | 4    | 88    | 88    |
| Ye   | 88    | 88    | 88    | Ye   | 88    | 88    | 88    | No   | 88    | 88    | 88    | 88   | Ye   | 88    | 88    |
| No   | 88    | No    | 88    | No   | 88    | 88    | 88    | 88   | 88    | 88    | 88    | 88   | 4    | 88    | 88    |

[illegible]



[illegible]



[illegible]

|    |       |    |       |    |    |       |    |    |    |    |    |       |       |    |
|----|-------|----|-------|----|----|-------|----|----|----|----|----|-------|-------|----|
| Ye | 88    | 88 | 88 No | 88 | 88 | 88    | 88 | 88 | 88 | 88 | 88 | 88 Ye | 88    | 88 |
| No | 88    | 88 | 88 No | 88 | 88 | 88    | 88 | 88 | 88 | 88 | 88 | 88 4  | 88    | 88 |
| No | 88    | 88 | 88 No | 88 | 88 | 88    | 88 | 88 | 88 | 88 | 88 | 88 Ye | 88    | 88 |
| No | 88    | 88 | 88 No | 88 | 88 | 88    | 88 | 88 | 88 | 88 | 88 | 88 Ye | 88    | 88 |
| No | 88    | 88 | 88 No | 88 | 88 | 88    | 88 | 88 | 88 | 88 | 88 | 88 Ye | 88    | 88 |
| No | 88    | 88 | 88 No | 88 | 88 | 88    | 88 | 88 | 88 | 88 | 88 | 88 Ye | 88    | 88 |
| No | 88    | 88 | 88 No | 88 | 88 | 88    | 88 | 88 | 88 | 88 | 88 | 88 Ye | 88    | 88 |
| Ye | 88    | 88 | 88 No | 88 | 88 | 88    | 88 | 88 | 88 | 88 | 88 | 88 Ye | 88    | 88 |
| No | 88    | 88 | 88 No | 88 | 88 | 88    | 88 | 88 | 88 | 88 | 88 | 88 Ye | 88    | 88 |
| No | 88    | 88 | 88 No | 88 | 88 | 88    | 88 | 88 | 88 | 88 | 88 | 88 Ye | 88    | 88 |
| No | 88 No |    | 88 No | 88 | 88 | 88    | 88 | 88 | 88 | 88 | 88 | 88 Ye | 88 Ye |    |
| No | 88    | 88 | 88 No | 88 | 88 | 88    | 88 | 88 | 88 | 88 | 88 | 88 Ye | 88    | 88 |
| No | 88    | 88 | 88 Ye | 88 | 88 | 88 No |    | 88 | 88 | 88 | 88 | 88 Ye | 88    | 88 |
| No | 88    | 88 | 88 No | 88 | 88 | 88    | 88 | 88 | 88 | 88 | 88 | 88 Ye | 88    | 88 |
| No | 88    | 88 | 88 No | 88 | 88 | 88    | 88 | 88 | 88 | 88 | 88 | 88 Ye | 88    | 88 |
| No | 88    | 88 | 88 No | 88 | 88 | 88    | 88 | 88 | 88 | 88 | 88 | 88 4  | 88    | 88 |
| No | 88    | 88 | 88 No | 88 | 88 | 88    | 88 | 88 | 88 | 88 | 88 | 88 Ye | 88    | 88 |
| No | 88    | 88 | 88 No | 88 | 88 | 88    | 88 | 88 | 88 | 88 | 88 | 88 Ye | 88    | 88 |

[illegible]



[illegible]

[illegible]

[illegible]

[illegible]

[illegible]

[illegible]

| q47other             | q47other1 | q47other2 | q47other3 | q48h | q48h1 | q48h2 | q48h3 | q49t | q49t1 | q49t2 |
|----------------------|-----------|-----------|-----------|------|-------|-------|-------|------|-------|-------|
| NA                   | NA        | NA        | NA        | 2    | 88    | 88    | 88    | Ev   | 88    | 88    |
| NA                   | NA        | NA        | NA        | 2    | 88    | 88    | 88    | Af   | 88    | 88    |
| NA                   | NA        | NA        | NA        | 3    | 88    | 88    | 88    | Ev   | 88    | 88    |
| NA                   | NA        | NA        | NA        | 3    | 88    | 88    | 88    | Mo   | 88    | 88    |
| NA                   | NA        | NA        | NA        | 2    | 88    | 88    | 88    | Mo   | 88    | 88    |
| NA                   | NA        | NA        | NA        | 2    | 88    | 88    | 88    | Ev   | 88    | 88    |
| NA                   | NA        | NA        | NA        | 1    | 88    | 1     | 88    | Mo   | 88    | Ev    |
| NA                   | NA        | NA        | NA        | 1    | 88    | 1     | 88    | Mo   | 88    | Ev    |
| NA                   | NA        | NA        | NA        | 2    | 88    | 88    | 88    | Mo   | 88    | 88    |
| NA                   | NA        | NA        | NA        | 2    | 88    | 88    | 88    | Ev   | 88    | 88    |
| DID NOT EAT          | NA        | NA        | NA        | 88   | 88    | 88    | 88    | 88   | 88    | 88    |
| NA                   | NA        | NA        | NA        | 2    | 88    | 88    | 88    | Ev   | 88    | 88    |
| NA                   | NA        | NA        | NA        | 1    | 88    | 1     | 88    | Mo   | 88    | Ev    |
| NA                   | NA        | NA        | NA        | 1    | 88    | 1     | 88    | Mo   | 88    | Ev    |
| NA                   | NA        | NA        | NA        | 2    | 88    | 88    | 88    | Af   | 88    | 88    |
| NA                   | NA        | NA        | NA        | 3    | 88    | 88    | 88    | Mo   | 88    | 88    |
| NA                   | NA        | NA        | NA        | 3    | 88    | 88    | 88    | Ev   | 88    | 88    |
| NA                   | NA        | NA        | NA        | 3    | 88    | 88    | 88    | Ev   | 88    | 88    |
| NA                   | NA        | NA        | NA        | 1    | 88    | 1     | 88    | Mo   | 88    | Ev    |
| NA                   | NA        | NA        | NA        | 2    | 88    | 88    | 88    | Ev   | 88    | 88    |
| NA                   | NA        | NA        | NA        | 2    | 88    | 88    | 88    | Ev   | 88    | 88    |
| BECAUSE THE CHILD BO | NA        | TEMPETUR  | NA        | 88   | 88    | 88    | 88    | 88   | 88    | 88    |
| NA                   | NA        | NA        | NA        | 2    | 88    | 88    | 88    | Ev   | 88    | 88    |
| NA                   | NA        | NA        | NA        | 3    | 88    | 88    | 88    | Ev   | 88    | 88    |
| NA                   | NA        | NA        | NA        | 3    | 88    | 88    | 88    | Ev   | 88    | 88    |
| NA                   | NA        | NA        | NA        | 2    | 88    | 88    | 88    | Ev   | 88    | 88    |
| NA                   | NA        | NA        | NA        | 1    | 88    | 88    | 88    | Af   | 88    | 88    |
| NA                   | NA        | NA        | NA        | 88   | 88    | 88    | 88    | 88   | 88    | 88    |
| NA                   | NA        | NA        | NA        | 1    | 88    | 88    | 88    | Mo   | 88    | 88    |
| NA                   | NA        | NA        | NA        | 1    | 88    | 88    | 88    | Af   | 88    | 88    |
| NA                   | NA        | NA        | NA        | 2    | 88    | 88    | 88    | Ev   | 88    | 88    |
| NA                   | NA        | NA        | NA        | 2    | 88    | 88    | 88    | Af   | 88    | 88    |
| NA                   | NA        | NA        | NA        | 1    | 88    | 88    | 88    | Ev   | 88    | 88    |
| NA                   | NA        | NA        | NA        | 1    | 88    | 1     | 88    | Mo   | 88    | Ev    |
| NA                   | NA        | NA        | NA        | 1    | 88    | 1     | 88    | Mo   | 88    | Ev    |
| NA                   | NA        | NA        | NA        | 1    | 88    | 1     | 88    | Mo   | 88    | Ev    |
| NA                   | NA        | NA        | NA        | 88   | 88    | 88    | 88    | 88   | 88    | 88    |
| NA                   | NA        | NA        | NA        | 88   | 88    | 88    | 88    | 88   | 88    | 88    |
| NA                   | NA        | NA        | NA        | 1    | 88    | 1     | 88    | Mo   | 88    | Ev    |
| NA                   | NA        | NA        | NA        | 1    | 88    | 1     | 88    | Mo   | 88    | Ev    |
| NA                   | NA        | NA        | NA        | 1    | 88    | 2     | 88    | Mo   | 88    | Ev    |
| NA                   | NA        | NA        | NA        | 1    | 88    | 1     | 88    | Mo   | 88    | Ev    |
| NA                   | NA        | NA        | NA        | 1    | 88    | 1     | 88    | Mo   | 88    | Ev    |
| NA                   | NA        | NA        | NA        | 2    | 88    | 88    | 88    | Ev   | 88    | 88    |
| NA                   | NA        | NA        | NA        | 1    | 88    | 88    | 88    | Mo   | 88    | 88    |
| NA                   | NA        | NA        | NA        | 1    | 88    | 1     | 88    | Mo   | 88    | Ev    |

|    |    |    |    |    |    |    |       |       |    |
|----|----|----|----|----|----|----|-------|-------|----|
| NA | NA | NA | NA | 2  | 88 | 88 | 88 Mo | 88    | 88 |
| NA | NA | NA | NA | 1  | 88 | 88 | 88 Mo | 88    | 88 |
| NA | NA | NA | NA | 3  | 88 | 88 | 88 Mo | 88    | 88 |
| NA | NA | NA | NA | 1  | 88 | 1  | 88 Mo | 88 Ev |    |
| NA | NA | NA | NA | 2  | 88 | 88 | 88 Ev | 88    | 88 |
| NA | NA | NA | NA | 3  | 88 | 88 | 88 Mo | 88    | 88 |
| NA | NA | NA | NA | 2  | 88 | 88 | 88 Ev | 88    | 88 |
| NA | NA | NA | NA | 2  | 88 | 88 | 88 Ev | 88    | 88 |
| NA | NA | NA | NA | 3  | 88 | 88 | 88 Ev | 88    | 88 |
| NA | NA | NA | NA | 3  | 88 | 88 | 88 Ev | 88    | 88 |
| NA | NA | NA | NA | 2  | 88 | 88 | 88 Ev | 88    | 88 |
| NA | NA | NA | NA | 2  | 88 | 88 | 88 Mo | 88    | 88 |
| NA | NA | NA | NA | 2  | 88 | 88 | 88 Ev | 88    | 88 |
| NA | NA | NA | NA | 2  | 88 | 88 | 88 Mo | 88    | 88 |
| NA | NA | NA | NA | 3  | 88 | 88 | 88 Ev | 88    | 88 |
| NA | NA | NA | NA | 2  | 88 | 88 | 88 Mo | 88    | 88 |
| NA | NA | NA | NA | 88 | 88 | 88 | 88 88 | 88    | 88 |
| NA | NA | NA | NA | 2  | 88 | 88 | 88 Ev | 88    | 88 |
| NA | NA | NA | NA | 2  | 88 | 88 | 88 Mo | 88    | 88 |
| NA | NA | NA | NA | 1  | 88 | 1  | 88 Mo | 88 Ev |    |
| NA | NA | NA | NA | 1  | 88 | 88 | 88 Ev | 88    | 88 |
| NA | NA | NA | NA | 2  | 88 | 88 | 88 Mo | 88    | 88 |
| NA | NA | NA | NA | 2  | 88 | 88 | 88 Ev | 88    | 88 |
| NA | NA | NA | NA | 3  | 88 | 88 | 88 Ev | 88    | 88 |
| NA | NA | NA | NA | 2  | 88 | 88 | 88 Ev | 88    | 88 |
| NA | NA | NA | NA | 3  | 88 | 88 | 88 Ev | 88    | 88 |
| NA | NA | NA | NA | 2  | 88 | 88 | 88 Mo | 88    | 88 |
| NA | NA | NA | NA | 3  | 88 | 88 | 88 Ev | 88    | 88 |
| NA | NA | NA | NA | 88 | 88 | 88 | 88 88 | 88    | 88 |
| NA | NA | NA | NA | 2  | 88 | 88 | 88 Mo | 88    | 88 |
| NA | NA | NA | NA | 2  | 88 | 88 | 88 Ev | 88    | 88 |
| NA | NA | NA | NA | 2  | 88 | 88 | 88 Mo | 88    | 88 |
| NA | NA | NA | NA | 3  | 88 | 88 | 88 Ev | 88    | 88 |
| NA | NA | NA | NA | 3  | 88 | 88 | 88 Af | 88    | 88 |
| NA | NA | NA | NA | 3  | 88 | 88 | 88 Af | 88    | 88 |
| NA | NA | NA | NA | 2  | 88 | 88 | 88 Af | 88    | 88 |
| NA | NA | NA | NA | 2  | 88 | 88 | 88 Mo | 88    | 88 |
| NA | NA | NA | NA | 2  | 88 | 88 | 88 Af | 88    | 88 |
| NA | NA | NA | NA | 2  | 88 | 88 | 88 Ev | 88    | 88 |
| NA | NA | NA | NA | 2  | 88 | 88 | 88 Mo | 88    | 88 |
| NA | NA | NA | NA | 1  | 88 | 1  | 88 Mo | 88 Ev |    |
| NA | NA | NA | NA | 3  | 88 | 88 | 88 Mo | 88    | 88 |
| NA | NA | NA | NA | 88 | 88 | 88 | 88 88 | 88    | 88 |
| NA | NA | NA | NA | 88 | 88 | 88 | 88 88 | 88    | 88 |
| NA | NA | NA | NA | 88 | 88 | 88 | 88 88 | 88    | 88 |
| NA | NA | NA | NA | 2  | 88 | 88 | 88 Mo | 88    | 88 |
| NA | NA | NA | NA | 3  | 88 | 88 | 88 Mo | 88    | 88 |



|    |    |    |    |    |    |    |       |       |    |
|----|----|----|----|----|----|----|-------|-------|----|
| NA | NA | NA | NA | 3  | 88 | 88 | 88 Mo | 88    | 88 |
| NA | NA | NA | NA | 88 | 88 | 88 | 88 88 | 88    | 88 |
| NA | NA | NA | NA | 3  | 88 | 88 | 88 Ev | 88    | 88 |
| NA | NA | NA | NA | 88 | 88 | 88 | 88 88 | 88    | 88 |
| NA | NA | NA | NA | 2  | 88 | 88 | 88 Af | 88    | 88 |
| NA | NA | NA | NA | 2  | 88 | 88 | 88 Ev | 88    | 88 |
| NA | NA | NA | NA | 2  | 88 | 88 | 88 Ev | 88    | 88 |
| NA | NA | NA | NA | 2  | 88 | 88 | 88 Ev | 88    | 88 |
| NA | NA | NA | NA | 2  | 88 | 88 | 88 Af | 88    | 88 |
| NA | NA | NA | NA | 1  | 88 | 88 | 88 Ev | 88    | 88 |
| NA | NA | NA | NA | 2  | 88 | 88 | 88 Ev | 88    | 88 |
| NA | NA | NA | NA | 2  | 88 | 88 | 88 Ev | 88    | 88 |
| NA | NA | NA | NA | 2  | 88 | 88 | 88 Mo | 88    | 88 |
| NA | NA | NA | NA | 2  | 88 | 88 | 88 Mo | 88    | 88 |
| NA | NA | NA | NA | 3  | 88 | 88 | 88 Mo | 88    | 88 |
| NA | NA | NA | NA | 2  | 88 | 88 | 88 Mo | 88    | 88 |
| NA | NA | NA | NA | 3  | 88 | 88 | 88 Ev | 88    | 88 |
| NA | NA | NA | NA | 88 | 88 | 88 | 88 88 | 88    | 88 |
| NA | NA | NA | NA | 2  | 88 | 88 | 88 Af | 88    | 88 |
| NA | NA | NA | NA | 2  | 88 | 88 | 88 Mo | 88    | 88 |
| NA | NA | NA | NA | 2  | 88 | 88 | 88 Ev | 88    | 88 |
| NA | NA | NA | NA | 2  | 88 | 88 | 88 Ev | 88    | 88 |
| NA | NA | NA | NA | 2  | 88 | 88 | 88 Ev | 88    | 88 |
| NA | NA | NA | NA | 88 | 88 | 88 | 88 88 | 88    | 88 |
| NA | NA | NA | NA | 2  | 88 | 88 | 88 Af | 88    | 88 |
| NA | NA | NA | NA | 2  | 88 | 88 | 88 Ev | 88    | 88 |
| NA | NA | NA | NA | 2  | 88 | 88 | 88 Mo | 88    | 88 |
| NA | NA | NA | NA | 3  | 88 | 88 | 88 Mo | 88    | 88 |
| NA | NA | NA | NA | 3  | 88 | 88 | 88 Mo | 88    | 88 |
| NA | NA | NA | NA | 1  | 88 | 88 | 88 Af | 88    | 88 |
| NA | NA | NA | NA | 1  | 88 | 1  | 88 Mo | 88 Ev |    |
| NA | NA | NA | NA | 2  | 88 | 88 | 88 Mo | 88    | 88 |
| NA | NA | NA | NA | 88 | 88 | 88 | 88 88 | 88    | 88 |
| NA | NA | NA | NA | 1  | 88 | 1  | 88 Mo | 88    | 88 |
| NA | NA | NA | NA | 1  | 88 | 88 | 88 Mo | 88    | 88 |
| NA | NA | NA | NA | 2  | 88 | 88 | 88 Mo | 88    | 88 |
| NA | NA | NA | NA | 2  | 88 | 88 | 88 Mo | 88    | 88 |
| NA | NA | NA | NA | 2  | 88 | 88 | 88 Mo | 88    | 88 |
| NA | NA | NA | NA | 3  | 88 | 88 | 88 Mo | 88    | 88 |
| NA | NA | NA | NA | 3  | 88 | 88 | 88 Mo | 88    | 88 |
| NA | NA | NA | NA | 2  | 88 | 88 | 88 Mo | 88    | 88 |
| NA | NA | NA | NA | 3  | 88 | 88 | 88 Ev | 88    | 88 |
| NA | NA | NA | NA | 3  | 88 | 88 | 88 Mo | 88    | 88 |
| NA | NA | NA | NA | 88 | 88 | 88 | 88 88 | 88    | 88 |
| NA | NA | NA | NA | 2  | 88 | 88 | 88 Mo | 88    | 88 |
| NA | NA | NA | NA | 3  | 88 | 88 | 88 Mo | 88    | 88 |
| NA | NA | NA | NA | 88 | 88 | 88 | 88 88 | 88    | 88 |

|                      |    |    |    |    |    |    |       |    |    |
|----------------------|----|----|----|----|----|----|-------|----|----|
| NA                   | NA | NA | NA | 2  | 88 | 88 | 88 Af | 88 | 88 |
| NA                   | NA | NA | NA | 1  | 88 | 1  | 88 Mo | 88 | Ev |
| NA                   | NA | NA | NA | 1  | 88 | 1  | 88 Mo | 88 | Ev |
| NA                   | NA | NA | NA | 3  | 88 | 88 | 88 Mo | 88 | 88 |
| NA                   | NA | NA | NA | 1  | 88 | 88 | 88 Mo | 88 | 88 |
| NA                   | NA | NA | NA | 3  | 88 | 88 | 88 Mo | 88 | 88 |
| NA                   | NA | NA | NA | 2  | 88 | 88 | 88 Ev | 88 | 88 |
| NA                   | NA | NA | NA | 2  | 88 | 88 | 88 Mo | 88 | 88 |
| NA                   | NA | NA | NA | 2  | 88 | 88 | 88 Ev | 88 | 88 |
| NA                   | NA | NA | NA | 1  | 88 | 88 | 88 Mo | 88 | 88 |
| NA                   | NA | NA | NA | 88 | 88 | 88 | 88 88 | 88 | 88 |
| NA                   | NA | NA | NA | 2  | 88 | 88 | 88 Ev | 88 | 88 |
| NA                   | NA | NA | NA | 2  | 88 | 88 | 88 Mo | 88 | 88 |
| NA                   | NA | NA | NA | 2  | 88 | 88 | 88 Mo | 88 | 88 |
| NA                   | NA | NA | NA | 2  | 88 | 88 | 88 Ev | 88 | 88 |
| NA                   | NA | NA | NA | 88 | 88 | 88 | 88 88 | 88 | 88 |
| NA                   | NA | NA | NA | 2  | 88 | 88 | 88 Mo | 88 | 88 |
| NA                   | NA | NA | NA | 2  | 88 | 88 | 88 Mo | 88 | 88 |
| NA                   | NA | NA | NA | 2  | 88 | 88 | 88 Ev | 88 | 88 |
| NA                   | NA | NA | NA | 2  | 88 | 88 | 88 Ev | 88 | 88 |
| NA                   | NA | NA | NA | 2  | 88 | 88 | 88 Ev | 88 | 88 |
| NA                   | NA | NA | NA | 2  | 88 | 88 | 88 Mo | 88 | 88 |
| NA                   | NA | NA | NA | 2  | 88 | 88 | 88 Mo | 88 | 88 |
| NA                   | NA | NA | NA | 2  | 88 | 88 | 88 Ev | 88 | 88 |
| NA                   | NA | NA | NA | 2  | 88 | 88 | 88 Mo | 88 | 88 |
| NA                   | NA | NA | NA | 2  | 88 | 88 | 88 Mo | 88 | 88 |
| NA                   | NA | NA | NA | 1  | 88 | 88 | 88 Mo | 88 | 88 |
| NA                   | NA | NA | NA | 1  | 88 | 88 | 88 Mo | 88 | 88 |
| NA                   | NA | NA | NA | 88 | 88 | 88 | 88 88 | 88 | 88 |
| NA                   | NA | NA | NA | 1  | 88 | 1  | 88 Mo | 88 | Ev |
| NA                   | NA | NA | NA | 1  | 88 | 88 | 88 Af | 88 | 88 |
| NA                   | NA | NA | NA | 2  | 88 | 88 | 88 Ev | 88 | 88 |
| NA                   | NA | NA | NA | 2  | 88 | 88 | 88 Mo | 88 | 88 |
| NA                   | NA | NA | NA | 2  | 88 | 88 | 88 Mo | 88 | 88 |
| NA                   | NA | NA | NA | 2  | 88 | 88 | 88 Mo | 88 | 88 |
| NA                   | NA | NA | NA | 3  | 88 | 88 | 88 Mo | 88 | 88 |
| NA                   | NA | NA | NA | 2  | 88 | 88 | 88 Ev | 88 | 88 |
| NA                   | NA | NA | NA | 1  | 88 | 88 | 88 Af | 88 | 88 |
| NA                   | NA | NA | NA | 2  | 88 | 88 | 88 Ev | 88 | 88 |
| NA                   | NA | NA | NA | 1  | 88 | 88 | 88 Mo | 88 | 88 |
| NA                   | NA | NA | NA | 2  | 88 | 88 | 88 Mo | 88 | 88 |
| NA                   | NA | NA | NA | 1  | 88 | 88 | 88 Af | 88 | 88 |
| NA                   | NA | NA | NA | 2  | 88 | 88 | 88 Af | 88 | 88 |
| CHILD REFEWS TO TAKE | NA | NA | NA | 88 | 88 | 88 | 88 88 | 88 | 88 |
| NA                   | NA | NA | NA | 2  | 88 | 88 | 88 Mo | 88 | 88 |
| NA                   | NA | NA | NA | 2  | 88 | 88 | 88 Mo | 88 | 88 |
| NA                   | NA | NA | NA | 2  | 88 | 88 | 88 Ev | 88 | 88 |

|             |    |    |    |    |    |    |       |       |    |
|-------------|----|----|----|----|----|----|-------|-------|----|
| NA          | NA | NA | NA | 2  | 88 | 88 | 88 Ev | 88    | 88 |
| NA          | NA | NA | NA | 88 | 88 | 88 | 88 88 | 88    | 88 |
| NA          | NA | NA | NA | 3  | 88 | 88 | 88 Ev | 88    | 88 |
| NA          | NA | NA | NA | 2  | 88 | 88 | 88 Ev | 88    | 88 |
| NA          | NA | NA | NA | 2  | 88 | 88 | 88 Ev | 88    | 88 |
| NA          | NA | NA | NA | 2  | 88 | 88 | 88 Mo | 88    | 88 |
| NA          | NA | NA | NA | 1  | 88 | 88 | 88 Mo | 88    | 88 |
| NA          | NA | NA | NA | 2  | 88 | 88 | 88 Mo | 88    | 88 |
| NA          | NA | NA | NA | 2  | 88 | 88 | 88 Af | 88    | 88 |
| NA          | NA | NA | NA | 2  | 88 | 88 | 88 Mo | 88    | 88 |
| NA          | NA | NA | NA | 2  | 88 | 88 | 88 Mo | 88    | 88 |
| NA          | NA | NA | NA | 2  | 88 | 88 | 88 Mo | 88    | 88 |
| NA          | NA | NA | NA | 2  | 88 | 88 | 88 Mo | 88    | 88 |
| NA          | NA | NA | NA | 1  | 88 | 88 | 88 Mo | 88    | 88 |
| NA          | NA | NA | NA | 2  | 88 | 88 | 88 Af | 88    | 88 |
| NA          | NA | NA | NA | 3  | 88 | 88 | 88 Mo | 88    | 88 |
| NA          | NA | NA | NA | 2  | 88 | 88 | 88 Mo | 88    | 88 |
| NA          | NA | NA | NA | 2  | 88 | 88 | 88 Mo | 88    | 88 |
| NA          | NA | NA | NA | 2  | 88 | 88 | 88 Mo | 88    | 88 |
| NA          | NA | NA | NA | 1  | 88 | 88 | 88 Mo | 88    | 88 |
| NA          | NA | NA | NA | 3  | 88 | 88 | 88 Mo | 88    | 88 |
| NA          | NA | NA | NA | 2  | 88 | 88 | 88 Ev | 88    | 88 |
| NA          | NA | NA | NA | 2  | 88 | 88 | 88 Ev | 88    | 88 |
| NA          | NA | NA | NA | 1  | 88 | 88 | 88 Mo | 88    | 88 |
| NA          | NA | NA | NA | 2  | 88 | 88 | 88 Mo | 88    | 88 |
| NA          | NA | NA | NA | 3  | 88 | 88 | 88 Mo | 88    | 88 |
| NA          | NA | NA | NA | 88 | 88 | 88 | 88 88 | 88    | 88 |
| NA          | NA | NA | NA | 2  | 88 | 88 | 88 Mo | 88    | 88 |
| NA          | NA | NA | NA | 2  | 88 | 88 | 88 Mo | 88    | 88 |
| NA          | NA | NA | NA | 3  | 88 | 88 | 88 Ev | 88    | 88 |
| NA          | NA | NA | NA | 3  | 88 | 88 | 88 Mo | 88    | 88 |
| NA          | NA | NA | NA | 3  | 88 | 88 | 88 Ev | 88    | 88 |
| NA          | NA | NA | NA | 2  | 88 | 88 | 88 Ev | 88    | 88 |
| NA          | NA | NA | NA | 3  | 88 | 88 | 88 Mo | 88    | 88 |
| NA          | NA | NA | NA | 3  | 88 | 88 | 88 Af | 88    | 88 |
| NA          | NA | NA | NA | 3  | 88 | 88 | 88 Af | 88    | 88 |
| DID NOT EAT | NA | NA | NA | 88 | 88 | 88 | 88 88 | 88    | 88 |
| NA          | NA | NA | NA | 3  | 88 | 88 | 88 Ev | 88    | 88 |
| NA          | NA | NA | NA | 2  | 88 | 88 | 88 Mo | 88    | 88 |
| NA          | NA | NA | NA | 2  | 88 | 88 | 88 Mo | 88    | 88 |
| NA          | NA | NA | NA | 2  | 88 | 88 | 88 Mo | 88    | 88 |
| NA          | NA | NA | NA | 2  | 88 | 88 | 88 Mo | 88    | 88 |
| NA          | NA | NA | NA | 2  | 88 | 88 | 88 Mo | 88    | 88 |
| NA          | NA | NA | NA | 1  | 88 | 1  | 88 Mo | 88 Ev |    |
| NA          | NA | NA | NA | 3  | 88 | 88 | 88 Ev | 88    | 88 |
| NA          | NA | NA | NA | 3  | 88 | 88 | 88 Ev | 88    | 88 |
| NA          | NA | NA | NA | 2  | 88 | 88 | 88 Ev | 88    | 88 |

|    |    |    |    |    |    |    |       |       |    |
|----|----|----|----|----|----|----|-------|-------|----|
| NA | NA | NA | NA | 2  | 88 | 88 | 88 Ev | 88    | 88 |
| NA | NA | NA | NA | 1  | 88 | 88 | 88 Mo | 88    | 88 |
| NA | NA | NA | NA | 1  | 88 | 88 | 88 Mo | 88    | 88 |
| NA | NA | NA | NA | 2  | 88 | 88 | 88 Af | 88    | 88 |
| NA | NA | NA | NA | 2  | 88 | 88 | 88 Af | 88    | 88 |
| NA | NA | NA | NA | 2  | 88 | 88 | 88 Ev | 88    | 88 |
| NA | NA | NA | NA | 2  | 88 | 88 | 88 Ev | 88    | 88 |
| NA | NA | NA | NA | 2  | 88 | 88 | 88 Af | 88    | 88 |
| NA | NA | NA | NA | 2  | 88 | 88 | 88 Af | 88    | 88 |
| NA | NA | NA | NA | 88 | 88 | 88 | 88 88 | 88    | 88 |
| NA | NA | NA | NA | 2  | 88 | 88 | 88 Mo | 88    | 88 |
| NA | NA | NA | NA | 1  | 88 | 1  | 88 Mo | 88 Ev |    |
| NA | NA | NA | NA | 2  | 88 | 88 | 88 Ev | 88    | 88 |
| NA | NA | NA | NA | 2  | 88 | 88 | 88 Mo | 88    | 88 |
| NA | NA | NA | NA | 2  | 88 | 88 | 88 Mo | 88    | 88 |
| NA | NA | NA | NA | 2  | 88 | 88 | 88 Mo | 88    | 88 |
| NA | NA | NA | NA | 2  | 88 | 88 | 88 Mo | 88    | 88 |
| NA | NA | NA | NA | 2  | 88 | 88 | 88 Mo | 88    | 88 |
| NA | NA | NA | NA | 88 | 88 | 88 | 88 88 | 88    | 88 |
| NA | NA | NA | NA | 2  | 88 | 88 | 88 Mo | 88    | 88 |
| NA | NA | NA | NA | 2  | 88 | 88 | 88 Ev | 88    | 88 |
| NA | NA | NA | NA | 2  | 88 | 88 | 88 Mo | 88    | 88 |
| NA | NA | NA | NA | 2  | 88 | 88 | 88 Mo | 88    | 88 |
| NA | NA | NA | NA | 2  | 88 | 88 | 88 Mo | 88    | 88 |
| NA | NA | NA | NA | 3  | 88 | 88 | 88 Mo | 88    | 88 |
| NA | NA | NA | NA | 2  | 88 | 88 | 88 Mo | 88    | 88 |
| NA | NA | NA | NA | 1  | 88 | 88 | 88 Mo | 88    | 88 |
| NA | NA | NA | NA | 88 | 88 | 88 | 88 88 | 88    | 88 |
| NA | NA | NA | NA | 2  | 88 | 88 | 88 Ev | 88    | 88 |
| NA | NA | NA | NA | 1  | 88 | 88 | 88 Mo | 88    | 88 |
| NA | NA | NA | NA | 2  | 88 | 88 | 88 Mo | 88    | 88 |
| NA | NA | NA | NA | 88 | 88 | 88 | 88 88 | 88    | 88 |
| NA | NA | NA | NA | 2  | 88 | 88 | 88 Ev | 88    | 88 |
| NA | NA | NA | NA | 2  | 88 | 88 | 88 Mo | 88    | 88 |
| NA | NA | NA | NA | 2  | 88 | 88 | 88 Mo | 88    | 88 |
| NA | NA | NA | NA | 2  | 88 | 88 | 88 Mo | 88    | 88 |
| NA | NA | NA | NA | 1  | 88 | 1  | 88 Mo | 88 Ev |    |
| NA | NA | NA | NA | 1  | 88 | 1  | 88 Mo | 88 Ev |    |
| NA | NA | NA | NA | 1  | 88 | 88 | 88 88 | 88    | 88 |
| NA | NA | NA | NA | 2  | 88 | 88 | 88 Ev | 88    | 88 |
| NA | NA | NA | NA | 2  | 88 | 88 | 88 Ev | 88    | 88 |
| NA | NA | NA | NA | 1  | 88 | 88 | 88 Mo | 88    | 88 |
| NA | NA | NA | NA | 1  | 88 | 1  | 88 Mo |       | Ev |
| NA | NA | NA | NA | 1  | 88 | 1  | 88 Mo | 88 Ev |    |
| NA | NA | NA | NA | 88 | 88 | 1  | 88 88 | 88 Ev |    |
| NA | NA | NA | NA | 2  | 88 | 88 | 88 Mo | 88    | 88 |
| NA | NA | NA | NA | 2  | 88 | 88 | 88 Mo | 88    | 88 |
| NA | NA | NA | NA | 2  | 88 | 88 | 88 Af | 88    | 88 |
| NA | NA | NA | NA | 2  | 88 | 88 | 88 Af | 88    | 88 |

|    |    |    |    |    |    |    |       |    |    |
|----|----|----|----|----|----|----|-------|----|----|
| NA | NA | NA | NA | 1  | 88 | 88 | 88 Mo | 88 | 88 |
| NA | NA | NA | NA | 2  | 88 | 88 | 88 Mo | 88 | 88 |
| NA | NA | NA | NA | 2  | 88 | 88 | 88 Mo | 88 | 88 |
| NA | NA | NA | NA | 2  | 88 | 88 | 88 Af | 88 | 88 |
| NA | NA | NA | NA | 2  | 88 | 88 | 88 Mo | 88 | 88 |
| NA | NA | NA | NA | 88 | 88 | 88 | 88 88 | 88 | 88 |
| NA | NA | NA | NA | 2  | 88 | 88 | 88 Mo | 88 | 88 |
| NA | NA | NA | NA | 2  | 88 | 88 | 88 Ev | 88 | 88 |
| NA | NA | NA | NA | 2  | 88 | 88 | 88 Mo | 88 | 88 |
| NA | NA | NA | NA | 2  | 88 | 88 | 88 Mo | 88 | 88 |
| NA | NA | NA | NA | 1  | 88 | 88 | 88 88 | 88 | 88 |
| NA | NA | NA | NA | 2  | 88 | 88 | 88 Mo | 88 | 88 |
| NA | NA | NA | NA | 88 | 88 | 88 | 88 88 | 88 | 88 |
| NA | NA | NA | NA | 1  | 88 | 88 | 88 Mo | 88 | 88 |
| NA | NA | NA | NA | 2  | 88 | 88 | 88 Ev | 88 | 88 |
| NA | NA | NA | NA | 2  | 88 | 88 | 88 Mo | 88 | 88 |
| NA | NA | NA | NA | 2  | 88 | 88 | 88 Mo | 88 | 88 |
| NA | NA | NA | NA | 2  | 88 | 88 | 88 Ev | 88 | 88 |

[illegible]

[illegible]

[illegible]



[illegible]

[illegible]

[illegible]

[illegible]

| q53i3 | q54i  | q55w | q55w1 | q55w2 | q55w3 | q56d | q56d1 | q56d2 | q56d3 | q57i  | q57i1 | q57i2 | q57i3 | q57anti |
|-------|-------|------|-------|-------|-------|------|-------|-------|-------|-------|-------|-------|-------|---------|
| 88    | 88 Mo | NA   | NA    | NA    | N     |      | 8     | 8     | 8 Me  | 88    | 88    | 88    | 88 NA |         |
| 88    | 88 Ot | NA   | NA    | NA    | N     |      | 8     | 8     | 8 Me  | 88    | 88    | 88    | 88 NA |         |
| 88    | 88 NA | NA   | NA    | NA    | N     |      | 8     | 8     | 8 Me  | 88    | 88    | 88    | 88 NA |         |
| 88    | 88 NA | NA   | NA    | NA    | N     |      | 8     | 8     | 8 Me  | 88    | 88    | 88    | 88 NA |         |
| 88    | 88 Fa | NA   | NA    | NA    | N     |      | 8     | 8     | 8 Me  | 88    | 88    | 88    | 88 NA |         |
| 88    | 88 Mo | NA   | NA    | NA    | N     |      | 8     | 8     | 8 Me  | 88    | 88    | 88    | 88 NA |         |
| 88    | 88 Fa | NA   | Fa    | NA    | N     |      | 8     | 8     | 8 Fo  | 88    | 88    | 88    | 88 NA |         |
| 88    | 88 Fa | NA   | Fa    | NA    | Y     |      | 8     | 8     | 8 88  | 88    | 88    | 88    | 88 NA |         |
| 88    | 88 Mo | NA   | NA    | NA    | N     |      | 8     | 8     | 8 Me  | 88    | 88    | 88    | 88 NA |         |
| 88    | 88 Mo | NA   | NA    | NA    | N     |      | 8     | 8     | 8 Me  | 88    | 88    | 88    | 88 NA |         |
| 88    | 88 NA | NA   | NA    | NA    | Y     |      | 8     | 8     | 8 88  | 88    | 88    | 88    | 88 NA |         |
| 88    | 88 Mo | NA   | NA    | NA    | N     |      | 8     | 8     | 8 Me  | 88    | 88    | 88    | 88 NA |         |
| 88    | 88 Fa | NA   | Fa    | NA    | Y     |      | 8     | 8     | 8 88  | 88    | 88    | 88    | 88 NA |         |
| 88    | 88 Mo | NA   | Mo    | NA    | N     |      | 8     | 8     | 8 ot  | 88    | 88    | 88    | 88 NA |         |
| 88    | 88 Fa | NA   | NA    | NA    | N     |      | 8     | 8     | 8 Me  | 88    | 88    | 88    | 88 NA |         |
| 88    | 88 NA | NA   | NA    | NA    | N     |      | 8     | 8     | 8 Me  | 88    | 88    | 88    | 88 NA |         |
| 88    | 88 NA | NA   | NA    | NA    | N     |      | 8     | 8     | 8 Me  | 88    | 88    | 88    | 88 NA |         |
| 88    | 88 NA | NA   | NA    | NA    | N     |      | 8     | 8     | 8 Me  | 88    | 88    | 88    | 88 NA |         |
| 88    | 88 NA | NA   | NA    | NA    | Y     |      | 8     | 8     | 8 88  | 88    | 88    | 88    | 88 NA |         |
| 88    | 88 Mo | NA   | NA    | NA    | N     |      | 8     | 8     | 8 Me  | 88    | 88    | 88    | 88 NA |         |
| 88    | 88 Mo | NA   | NA    | NA    | N     |      | 8     | 8     | 8 Me  | 88    | 88    | 88    | 88 NA |         |
| 88    | 88 NA | NA   | NA    | NA    | Y     |      | 8     | 8     | 8 88  | 88    | 88    | 88    | 88 NA |         |
| 88    | 88 Mo | NA   | NA    | NA    | N     |      | 8     | 8     | 8 Me  | 88    | 88    | 88    | 88 NA |         |
| 88    | 88 NA | NA   | NA    | NA    | N     |      | 8     | 8     | 8 Me  | 88    | 88    | 88    | 88 NA |         |
| 88    | 88 Mo | NA   | NA    | NA    | N     |      | 8     | 8     | 8 Me  | 88    | 88    | 88    | 88 NA |         |
| 88    | 88 Mo | NA   | NA    | NA    | N     |      | 8     | 8     | 8 Me  | 88    | 88    | 88    | 88 NA |         |
| 88    | 88 Mo | NA   | NA    | NA    | N     |      | 8     | 8     | 8 Me  | 88    | 88    | 88    | 88 NA |         |
| 88    | 88 NA | NA   | NA    | NA    | N     |      | 8     | 8     | 8 No  | 88    | 88    | 88    | 88 NA |         |
| 88    | 88 NA | NA   | NA    | NA    | Y     |      | 8     | 8     | 8 88  | 88    | 88    | 88    | 88 NA |         |
| 88    | 88 Mo | NA   | NA    | NA    | N     |      | 8     | 8     | 8 Me  | 88    | 88    | 88    | 88 NA |         |
| 88    | 88 Ot | NA   | NA    | NA    | N     |      | 8     | 8     | 8 Me  | 88    | 88    | 88    | 88 NA |         |
| 88    | 88 Fa | NA   | NA    | NA    | N     |      | 8     | 8     | 8 Me  | 88    | 88    | 88    | 88 NA |         |
| 88    | 88 Mo | NA   | NA    | NA    | N     |      | 8     | 8     | 8 Me  | 88    | 88    | 88    | 88 NA |         |
| 88    | 88 NA | NA   | NA    | NA    | N     |      | 8     | 8     | 8 Me  | 88    | 88    | 88    | 88 NA |         |
| 88    | 88 NA | NA   | NA    | NA    | N     |      | 8     | 8     | 8 Me  | 88 Me |       | 88    | 88 NA |         |
| 88    | 88 NA | NA   | NA    | NA    | Y     |      | 8     | 8     | 8 88  | 88    | 88    | 88    | 88 NA |         |
| 88    | 88 NA | NA   | NA    | NA    | N     |      | 8     | 8     | 8 Si  | 88    | 88    | 88    | 88 NA |         |
| 88    | 88 NA | NA   | NA    | NA    | Y     |      | 8     | 8     | 8 88  | 88    | 88    | 88    | 88 NA |         |
| 88    | 88 Mo | NA   | Mo    | NA    | N     |      | 8     | 8     | 8 Me  | 88    | 88    | 88    | 88 NA |         |
| 88    | 88 Ot | NA   | Ot    | NA    | N     |      | 8     | 8     | 8 Me  | 88    | 88    | 88    | 88 NA |         |
| 88    | 88 Ot | NA   | Ot    | NA    | N     |      | 8     | 8     | 8 Me  | 88    | 88    | 88    | 88 NA |         |
| 88    | 88 NA | NA   | NA    | NA    | N     |      | 8     | 8     | 8 Me  | 88    | 88    | 88    | 88 NA |         |
| 88    | 88 Mo | NA   | Ot    | NA    | N     |      | 8     | 8     | 8 ot  | 88    | 88    | 88    | 88 NA |         |
| 88    | 88 Ot | NA   | NA    | NA    | N     |      | 8     | 8     | 8 Me  | 88    | 88    | 88    | 88 NA |         |
| 88    | 88 Mo | NA   | NA    | NA    | N     |      | 8     | 8     | 8 Me  | 88    | 88    | 88    | 88 NA |         |
| 88    | 88 Ot | NA   | Ot    | NA    | Y     |      | 8     | 8     | 8 88  | 88    | 88    | 88    | 88 NA |         |

[illegible]

[illegible]

[illegible]



[illegible]

[illegible]

|    |       |    |    |    |   |   |   |      |    |    |       |
|----|-------|----|----|----|---|---|---|------|----|----|-------|
| 88 | 88 Mo | NA | NA | NA | N | 8 | 8 | 8 Me | 88 | 88 | 88 NA |
| 88 | 88 Ot | NA | NA | NA | N | 8 | 8 | 8 Me | 88 | 88 | 88 NA |
| 88 | 88 Mo | NA | NA | NA | N | 8 | 8 | 8 Me | 88 | 88 | 88 NA |
| 88 | 88 Mo | NA | NA | NA | N | 8 | 8 | 8 Me | 88 | 88 | 88 NA |
| 88 | 88 Mo | NA | NA | NA | N | 8 | 8 | 8 Me | 88 | 88 | 88 NA |
| 88 | 88 NA | NA | NA | NA | N | 8 | 8 | 8 Do | 88 | 88 | 88 NA |
| 88 | 88 Mo | NA | NA | NA | N | 8 | 8 | 8 Me | 88 | 88 | 88 NA |
| 88 | 88 Mo | NA | NA | NA | N | 8 | 8 | 8 Me | 88 | 88 | 88 NA |
| 88 | 88 Mo | NA | NA | NA | N | 8 | 8 | 8 Me | 88 | 88 | 88 NA |
| 88 | 88 Mo | NA | NA | NA | N | 8 | 8 | 8 Me | 88 | 88 | 88 NA |
| 88 | 88 Mo | NA | NA | NA | N | 8 | 8 | 8 Me | 88 | 88 | 88 NA |
| 88 | 88 Mo | NA | NA | NA | N | 8 | 8 | 8 Me | 88 | 88 | 88 NA |
| 88 | 88 Mo | NA | NA | NA | N | 8 | 8 | 8 Me | 88 | 88 | 88 NA |
| 88 | 88 Mo | NA | NA | NA | N | 8 | 8 | 8 Me | 88 | 88 | 88 NA |
| 88 | 88 Mo | NA | NA | NA | N | 8 | 8 | 8 Me | 88 | 88 | 88 NA |
| 88 | 88 Ot | NA | NA | NA | N | 8 | 8 | 8 Me | 88 | 88 | 88 NA |
| 88 | 88 Mo | NA | NA | NA | N | 8 | 8 | 8 Me | 88 | 88 | 88 NA |
| 88 | 88 Mo | NA | NA | NA | N | 8 | 8 | 8 Me | 88 | 88 | 88 NA |



[illegible]

|    |    |    |                      |    |    |    |    |    |
|----|----|----|----------------------|----|----|----|----|----|
| NA | NA | NA | NA                   | NA | NA | NA | 88 | 88 |
| NA | NA | NA | NA                   | NA | NA | NA | 2  | 88 |
| NA | NA | NA | NA                   | NA | NA | NA | 88 | 88 |
| NA | NA | NA | NA                   | NA | NA | NA | 88 | 88 |
| NA | NA | NA | NA                   | NA | NA | NA | 88 | 88 |
| NA | NA | NA | NA                   | NA | NA | NA | 88 | 88 |
| NA | NA | NA | NA                   | NA | NA | NA | 88 | 88 |
| NA | NA | NA | NA                   | NA | NA | NA | 88 | 88 |
| NA | NA | NA | NA                   | NA | NA | NA | 88 | 88 |
| NA | NA | NA | NA                   | NA | NA | NA | 88 | 88 |
| NA | NA | NA | NA                   | NA | NA | NA | 88 | 88 |
| NA | NA | NA | NA                   | NA | NA | NA | 88 | 88 |
| NA | NA | NA | NA                   | NA | NA | NA | 88 | 88 |
| NA | NA | NA | NA                   | NA | NA | NA | 2  | 88 |
| NA | NA | NA | NA                   | NA | NA | NA | 88 | 88 |
| NA | NA | NA | NA                   | NA | NA | NA | 88 | 88 |
| NA | NA | NA | NA                   | NA | NA | NA | 88 | 88 |
| NA | NA | NA | NOT YET EATE         | NA | NA | NA | 88 | 88 |
| NA | NA | NA | NA                   | NA | NA | NA | 88 | 88 |
| NA | NA | NA | NA                   | NA | NA | NA | 88 | 88 |
| NA | NA | NA | NA                   | NA | NA | NA | 88 | 88 |
| NA | NA | NA | NA                   | NA | NA | NA | 88 | 88 |
| NA | NA | NA | NA                   | NA | NA | NA | 88 | 88 |
| NA | NA | NA | NA                   | NA | NA | NA | 88 | 88 |
| NA | NA | NA | NA                   | NA | NA | NA | 2  | 88 |
| NA | NA | NA | NA                   | NA | NA | NA | 88 | 88 |
| NA | NA | NA | NA                   | NA | NA | NA | 88 | 88 |
| NA | NA | NA | NA                   | NA | NA | NA | 88 | 88 |
| NA | NA | NA | NA                   | NA | NA | NA | 88 | 88 |
| NA | NA | NA | NA                   | NA | NA | NA | 1  | 88 |
| NA | NA | NA | NA                   | NA | NA | NA | 88 | 88 |
| NA | NA | NA | NA                   | NA | NA | NA | 2  | 88 |
| NA | NA | NA | NA                   | NA | NA | NA | 1  | 88 |
| NA | NA | NA | NA                   | NA | NA | NA | 88 | 88 |
| NA | NA | NA | NA                   | NA | NA | NA | 88 | 88 |
| NA | NA | NA | NA                   | NA | NA | NA | 88 | 88 |
| NA | NA | NA | NA                   | NA | NA | NA | 88 | 88 |
| NA | NA | NA | NA                   | NA | NA | NA | 88 | 88 |
| NA | NA | NA | NA                   | NA | NA | NA | 88 | 88 |
| NA | NA | NA | NA                   | NA | NA | NA | 88 | 88 |
| NA | NA | NA | NA                   | NA | NA | NA | 88 | 88 |
| NA | NA | NA | NA                   | NA | NA | NA | 88 | 88 |
| NA | NA | NA | NA                   | NA | NA | NA | 88 | 88 |
| NA | NA | NA | NA                   | NA | NA | NA | 88 | 88 |
| NA | NA | NA | YET TO TAKE MEDICINE | NA | NA | NA | 88 | 88 |

[illegible]

[illegible]



[illegible]

[illegible]

[illegible]

[illegible]

[illegible]

[illegible]

[illegible]

[illegible]



[illegible]

| q62v2 | q62v3 | q63i | q63i1 | q63i2 | q63i3 | q64i | q65w | q65w1 | q65w2 | q65w3 | q66 | q67 | q67a | q68 | q69 | q70 |
|-------|-------|------|-------|-------|-------|------|------|-------|-------|-------|-----|-----|------|-----|-----|-----|
| 88    | 88    | 88   | 88    | 88    | 88    | 88   | NA   | NA    | NA    | NA    | Y   | Pa  | NA   | Ye  | 6   | Ye  |
| 88    | 88    | 88   | 88    | 88    | 88    | 88   | Ot   | NA    | NA    | NA    | Y   | Ot  | NA   | Ye  | 6   | Ye  |
| 88    | 88    | 88   | 88    | 88    | 88    | 88   | NA   | NA    | NA    | NA    | N   |     | NA   | Ye  | 9   | Ye  |
| 88    | 88    | 88   | 88    | 88    | 88    | 88   | NA   | NA    | NA    | NA    | N   |     | NA   | Ye  | 9   | Ye  |
| 88    | 88    | 88   | 88    | 88    | 88    | 88   | NA   | NA    | NA    | NA    | Y   | Pa  | NA   | Ye  | 6   | Ye  |
| 88    | 88    | 88   | 88    | 88    | 88    | 88   | NA   | NA    | NA    | NA    | Y   | Pa  | NA   | Ye  | 6   | Ye  |
| 88    | 88    | 88   | 88    | 88    | 88    | 88   | NA   | NA    | NA    | NA    | Y   | Pa  | NA   | Ye  | 6   | Ye  |
| 88    | 88    | 88   | 88    | 88    | 88    | 88   | Fa   | NA    | NA    | NA    | Y   | Pa  | NA   | Ye  | 6   | Ye  |
| 88    | 88    | 88   | 88    | 88    | 88    | 88   | NA   | NA    | NA    | NA    | Y   | Pa  | NA   | Ye  | 6   | Ye  |
| 88    | 88    | 88   | 88    | 88    | 88    | 88   | NA   | NA    | NA    | NA    | Y   | Pa  | NA   | Ye  | 6   | Ye  |
| 88    | 88    | 88   | 88    | 88    | 88    | 88   | NA   | NA    | NA    | NA    | N   | 99  | NA   | Ye  | 9   | Ye  |
| 88    | 88    | 88   | 88    | 88    | 88    | 88   | Mo   | NA    | NA    | NA    | Y   | Pa  | NA   | Ye  | 6   | Ye  |
| 88    | 88    | 88   | 88    | 88    | 88    | 88   | Fa   | NA    | NA    | NA    | Y   | Pa  | NA   | Ye  | 6   | Ye  |
| 88    | 88    | 88   | 88    | 88    | 88    | 88   | NA   | NA    | NA    | NA    | Y   | Pa  | NA   | Ye  | 6   | Ye  |
| 88    | 88    | 88   | 88    | 88    | 88    | 88   | NA   | NA    | NA    | NA    | Y   | Pa  | NA   | Ye  | 6   | Ye  |
| 88    | 88    | 88   | 88    | 88    | 88    | 88   | NA   | NA    | NA    | NA    | N   |     | NA   | Ye  | 9   | Ye  |
| 88    | 88    | 88   | 88    | 88    | 88    | 88   | NA   | NA    | NA    | NA    | Y   | Pa  | NA   | Ye  | 9   | Ye  |
| 88    | 88    | 88   | 88    | 88    | 88    | 88   | NA   | NA    | NA    | NA    | N   |     | NA   | Ye  | 9   | Ye  |
| 88    | 88    | 88   | 88    | 88    | 88    | 88   | NA   | NA    | NA    | NA    | N   |     | NA   | Ye  | 9   | Ye  |
| 88    | 88    | 88   | 88    | 88    | 88    | 88   | NA   | NA    | NA    | NA    | Y   | Pa  | NA   | Ye  | 6   | Ye  |
| 88    | 88    | 88   | 88    | 88    | 88    | 88   | NA   | NA    | NA    | NA    | Y   | Pa  | NA   | Ye  | 6   | Ye  |
| 88    | 88    | 88   | 88    | 88    | 88    | 88   | Mo   | NA    | NA    | NA    | Y   | Pa  | NA   | Ye  | 6   | Ye  |
| 88    | 88    | 88   | 88    | 88    | 88    | 88   | NA   | NA    | NA    | NA    | Y   | Pa  | NA   | Ye  | 6   | Ye  |
| 88    | 88    | 88   | 88    | 88    | 88    | 88   | NA   | NA    | NA    | NA    | N   |     | NA   | Ye  | 9   | Ye  |
| 88    | 88    | 88   | 88    | 88    | 88    | 88   | NA   | NA    | NA    | NA    | Y   | Pa  | NA   | Ye  | 9   | Ye  |
| 88    | 88    | 88   | 88    | 88    | 88    | 88   | NA   | NA    | NA    | NA    | Y   | Pa  | NA   | Ye  | 6   | Ye  |
| 88    | 88    | 88   | 88    | 88    | 88    | 88   | NA   | NA    | NA    | NA    | Y   | Pa  | NA   | Ye  | 3   | Ye  |
| 88    | 88    | 88   | 88    | 88    | 88    | 88   | NA   | NA    | NA    | NA    | Y   | Pa  | NA   | Ye  | 6   | Ye  |
| 88    | 88    | 88   | 88    | 88    | 88    | 88   | NA   | NA    | NA    | NA    | Y   | Pa  | NA   | Ye  | 9   | Ye  |
| 88    | 88    | 88   | 88    | 88    | 88    | 88   | NA   | NA    | NA    | NA    | Y   | Pa  | NA   | Ye  | 3   | Ye  |
| 88    | 88    | 88   | 88    | 88    | 88    | 88   | NA   | NA    | NA    | NA    | N   |     | NA   | Ye  | 9   | Ye  |
| 88    | 88    | 88   | 88    | 88    | 88    | 88   | NA   | NA    | NA    | NA    | N   |     | NA   | Ye  | 9   | Ye  |
| 88    | 88    | 88   | 88    | 88    | 88    | 88   | NA   | NA    | NA    | NA    | N   |     | NA   | Ye  | 9   | Ye  |
| 88    | 88    | 88   | 88    | 88    | 88    | 88   | Mo   | NA    | NA    | NA    | Y   | Pa  | NA   | Ye  | 6   | Ye  |
| 88    | 88    | 88   | 88    | 88    | 88    | 88   | NA   | NA    | NA    | NA    | Y   | Pa  | NA   | Ye  | 6   | Ye  |
| 88    | 88    | 88   | 88    | 88    | 88    | 88   | NA   | NA    | NA    | NA    | Y   | Ot  | NA   | Ye  | 6   | Ye  |
| 88    | 88    | 88   | 88    | 88    | 88    | 88   | NA   | NA    | NA    | NA    | Y   | Ot  | NA   | Ye  | 6   | Ye  |
| 88    | 88    | 88   | 88    | 88    | 88    | 88   | NA   | NA    | NA    | NA    | Y   | Pa  | NA   | Ye  | 6   | Ye  |
| 88    | 88    | 88   | 88    | 88    | 88    | 88   | NA   | NA    | NA    | NA    | Y   | Pa  | NA   | Ye  | 6   | Ye  |
| 88    | 88    | 88   | 88    | 88    | 88    | 88   | NA   | NA    | NA    | NA    | Y   | Ot  | NA   | Ye  | 6   | Ye  |
| 88    | 88    | 88   | 88    | 88    | 88    | 88   | NA   | NA    | NA    | NA    | Y   | Pa  | NA   | Ye  | 3   | Ye  |
| 88    | 88    | 88   | 88    | 88    | 88    | 88   | Ot   | NA    | NA    | NA    | Y   | Ot  | NA   | Ye  | 6   | Ye  |

[illegible]

[illegible]

[illegible]

[illegible]

[illegible]

|    |    |    |    |    |    |    |    |    |    |    |   |    |    |    |      |
|----|----|----|----|----|----|----|----|----|----|----|---|----|----|----|------|
| 88 | 88 | 88 | 88 | 88 | 88 | 88 | NA | NA | NA | NA | Y | Pa | NA | Ye | 3 Ye |
| 88 | 88 | 88 | 88 | 88 | 88 | 88 | NA | NA | NA | NA | Y | Ot | NA | Ye | 6 Ye |
| 88 | 88 | 88 | 88 | 88 | 88 | 88 | NA | NA | NA | NA | Y | Pa | NA | Ye | 6 Ye |
| 88 | 88 | 88 | 88 | 88 | 88 | 88 | NA | NA | NA | NA | Y | Pa | NA | Ye | 6 Ye |
| 88 | 88 | 88 | 88 | 88 | 88 | 88 | NA | NA | NA | NA | Y | Pa | NA | Ye | 6 Ye |
| 88 | 88 | 88 | 88 | 88 | 88 | 88 | NA | NA | NA | NA | Y | Pa | NA | Ye | 6 Ye |
| 88 | 88 | 88 | 88 | 88 | 88 | 88 | NA | NA | NA | NA | Y | Pa | NA | Ye | 6 Ye |
| 88 | 88 | 88 | 88 | 88 | 88 | 88 | NA | NA | NA | NA | Y | Pa | NA | Ye | 6 Ye |
| 88 | 88 | 88 | 88 | 88 | 88 | 88 | NA | NA | NA | NA | Y | Ot | NA | Ye | 6 Ye |
| 88 | 88 | 88 | 88 | 88 | 88 | 88 | NA | NA | NA | NA | Y | Pa | NA | Ye | 6 Ye |
| 88 | 88 | 88 | 88 | 88 | 88 | 88 | NA | NA | NA | NA | Y | Pa | NA | Ye | 6 Ye |
| 88 | 88 | 88 | 88 | 88 | 88 | 88 | NA | NA | NA | NA | Y | Pa | NA | Ye | 6 Ye |
| 88 | 88 | 88 | 88 | 88 | 88 | 88 | NA | NA | NA | NA | Y | Pa | NA | Ye | 6 Ye |
| 88 | 88 | 88 | 88 | 88 | 88 | 88 | NA | NA | NA | NA | Y | Pa | NA | Ye | 6 Ye |
| 88 | 88 | 88 | 88 | 88 | 88 | 88 | NA | NA | NA | NA | Y | Pa | NA | Ye | 6 Ye |
| 88 | 88 | 88 | 88 | 88 | 88 | 88 | NA | NA | NA | NA | Y | Pa | NA | Ye | 6 Ye |
| 88 | 88 | 88 | 88 | 88 | 88 | 88 | NA | NA | NA | NA | Y | Ot | NA | Ye | 6 Ye |



| q71a | q71b | q71c | q71d | q71d1                | q72 | q73a | q73b | q73c | q74 | q75 | q75a |
|------|------|------|------|----------------------|-----|------|------|------|-----|-----|------|
| Y    |      |      |      | NA                   | 3   |      |      | 2    | N   |     | NA   |
| Y    |      |      |      | NA                   | 3   | 2    |      |      | Y   | R   | NA   |
| Y    |      |      |      | NA                   | 3   |      |      | 3    | N   | R   | NA   |
| Y    |      |      |      | NA                   | 3   | 3    |      |      | N   |     | NA   |
| Y    |      | Y    |      | NA                   | 3   | 2    |      |      | N   |     | NA   |
|      |      | Y    |      | NA                   | 3   | 2    |      |      | N   |     | NA   |
| Y    |      |      |      | NA                   | 3   | 2    |      |      | N   |     | NA   |
| Y    |      |      |      | NA                   | 3   |      |      | 2    | N   |     | NA   |
|      |      | Y    |      | NA                   | 3   | 2    |      |      | N   |     | NA   |
| Y    |      | Y    |      | NA                   | 3   | 2    |      |      | N   |     | NA   |
| Y    |      |      |      | NA                   | 3   | 3    |      |      | N   |     | NA   |
| Y    |      |      |      | NA                   | 3   | 2    |      |      | N   |     | NA   |
| Y    |      |      |      | NA                   | 3   | 2    |      |      | N   |     | NA   |
| Y    |      | Y    |      | NA                   | 3   | 1    |      | 1    | N   |     | NA   |
| Y    |      |      |      | NA                   | 3   | 2    |      |      | N   |     | NA   |
| Y    |      |      |      | NA                   | 3   | 3    |      |      | N   |     | NA   |
| Y    |      | Y    |      | NA                   | 3   | 3    |      |      | N   |     | NA   |
| Y    |      |      |      | NA                   | 3   | 3    |      |      | N   |     | NA   |
|      |      |      | Y    | DISPENCIN ASSISTANT  | 3   | 1    | 1    | 1    | N   |     | NA   |
| Y    |      |      |      | NA                   | 3   |      |      | 2    | N   |     | NA   |
|      |      |      | Y    | DISPENCIN ASSISTANT  | 3   |      |      | 2    | N   |     | NA   |
|      |      |      | Y    | DISPENCIN ASSISTANT  | 3   | 1    |      | 1    | N   |     | NA   |
|      |      |      | Y    | DISPENCYN ASSISTANT  | 3   |      |      | 2    | N   |     | NA   |
|      |      |      | Y    | DISPENCINE ASSISTANT | 3   |      |      | 3    | N   |     | NA   |
| Y    |      |      |      | NA                   | 3   |      |      | 3    | N   |     | NA   |
| Y    |      |      |      | NA                   | 3   |      |      | 2    | N   |     | NA   |
| Y    |      |      |      | NA                   | 3   | 1    |      |      | N   |     | NA   |
| Y    |      |      |      | NA                   | 3   | 2    |      |      | N   |     | NA   |
| Y    |      |      |      | NA                   | 3   | 1    |      |      | N   |     | NA   |
| Y    |      |      |      | NA                   | 3   |      | 3    |      | N   |     | NA   |
| Y    |      |      |      | NA                   | 3   |      |      | 2    | N   |     | NA   |
| Y    |      |      |      | NA                   | 3   |      | 2    |      | N   |     | NA   |
| Y    |      |      |      | NA                   | 3   |      |      | 1    | N   |     | NA   |
|      |      | Y    |      | NA                   | 3   | 1    | 1    | 1    | N   |     | NA   |
|      |      | Y    |      | NA                   | 3   | 1    | 1    | 1    | N   |     | NA   |
|      |      | Y    |      | NA                   | 3   | 1    | 1    | 1    | N   |     | NA   |
|      |      | Y    |      | NA                   | 3   | 1    | 1    | 1    | N   |     | NA   |
|      |      | Y    |      | NA                   | 3   | 1    |      | 1    | N   |     | NA   |
|      |      | Y    |      | NA                   | 3   | 1    |      | 1    | N   |     | NA   |
|      |      | Y    |      | NA                   | 3   | 1    |      | 1    | N   |     | NA   |
|      |      | Y    |      | NA                   | 3   | 1    |      | 1    | N   |     | NA   |
|      |      | Y    |      | NA                   | 3   | 1    |      | 1    | N   |     | NA   |
|      |      | Y    |      | NA                   | 3   | 2    |      |      | N   |     | NA   |
|      |      | Y    |      | NA                   | 3   | 1    |      | 1    | N   |     | NA   |
|      |      | Y    |      | NA                   | 3   | 1    |      | 1    | N   |     | NA   |
| Y    |      |      |      | NA                   | 3   | 2    |      |      | Y   | R   | NA   |
| Y    |      |      |      | NA                   | 3   | 1    |      |      | N   | R   | NA   |
|      |      | Y    |      | NA                   | 3   | 1    |      | 1    | N   |     | NA   |

|   |   |   |   |    |   |   |   |     |   |    |
|---|---|---|---|----|---|---|---|-----|---|----|
|   |   | Y |   | NA | 3 |   | 2 | N   |   | NA |
|   |   | Y |   | NA | 3 | 1 |   | N   |   | NA |
| Y |   |   |   | NA | 3 | 3 |   | N   |   | NA |
| Y |   |   |   | NA | 3 | 1 |   | 1 N |   | NA |
|   |   | Y |   | NA | 3 |   |   | 2 N |   | NA |
| Y |   |   |   | NA | 3 | 3 |   | N   | R | NA |
| Y |   |   |   | NA | 3 | 2 |   | Y   | R | NA |
| Y |   |   |   | NA | 3 | 2 |   | Y   | R | NA |
| Y |   |   |   | NA | 3 |   |   | 3 N |   | NA |
| Y |   |   |   | NA | 3 | 3 |   | Y   | R | NA |
| Y |   |   |   | NA | 3 | 2 |   | Y   | R | NA |
| Y |   |   |   | NA | 3 | 2 |   | Y   | R | NA |
| Y |   |   |   | NA | 3 |   |   | 2 Y | R | NA |
|   |   | Y |   | NA | 3 | 2 |   | N   |   | NA |
| Y |   |   |   | NA | 3 |   |   | 3 Y | R | NA |
|   |   | Y |   | NA | 3 | 2 |   | N   |   | NA |
| Y |   |   |   | NA | 3 |   |   | 2 Y | R | NA |
| Y |   |   |   | NA | 3 |   |   | 3 Y | R | NA |
| Y |   |   |   | NA | 3 | 2 |   | N   |   | NA |
|   |   | Y |   | NA | 3 | 1 |   | 1 N |   | NA |
|   |   | Y |   | NA | 3 |   |   | 1 N |   | NA |
| Y |   |   |   | NA | 3 | 2 |   | N   |   | NA |
| Y |   |   |   | NA | 3 | 2 |   | Y   | R | NA |
| Y |   |   |   | NA | 3 |   |   | 3 N |   | NA |
| Y |   |   |   | NA | 3 |   |   | 2 N |   | NA |
| Y |   |   |   | NA | 3 |   |   | 3 N |   | NA |
|   |   | Y |   | NA | 3 | 2 |   | N   |   | NA |
| Y |   |   |   | NA | 3 |   |   | 3 Y | R | NA |
| Y |   |   |   | NA | 3 |   |   | 2 Y | R | NA |
|   |   | Y |   | NA | 3 | 2 |   | N   |   | NA |
|   |   | Y |   | NA | 3 |   |   | 2 N |   | NA |
| Y |   |   |   | NA | 3 | 2 |   | N   | R | NA |
| Y |   |   |   | NA | 3 | 2 |   | Y   | R | NA |
| Y | N | N | N | NA | 3 |   | 3 | N   |   | NA |
| Y | N | N | N | NA | 3 |   | 3 | N   |   | NA |
| Y | N | N | N | NA | 3 |   | 2 | N   |   | NA |
| Y | N | N | N | NA | 3 | 2 |   | N   |   | NA |
| Y | N | N | N | NA | 3 |   |   | 2 N |   | NA |
| Y | N | N | N | NA | 3 |   |   | 2 N |   | NA |
| Y | N | N | N | NA | 3 | 2 |   | N   |   | NA |
| Y | N | N | N | NA | 3 | 1 |   | 1 N |   | NA |
| Y | N | N | N | NA | 3 | 3 |   | N   |   | NA |
| Y | N | N | N | NA | 3 | 1 |   | Y   | R | NA |
| Y | N | N | N | NA | 3 | 1 |   | Y   | R | NA |
| Y | N | N | N | NA | 3 | 2 |   | Y   | R | NA |
|   |   |   |   | NA |   |   |   |     |   | NA |
| Y | N | N | N | NA | 3 | 3 |   | Y   | R | NA |

|   |   |   |   |    |   |   |   |     |      |
|---|---|---|---|----|---|---|---|-----|------|
| Y | Y | N | N | NA | 3 |   | 3 | N   | NA   |
| Y | N | N | N | NA | 3 | 2 |   | N   | NA   |
| Y | N | N | N | NA | 3 |   |   | 3 N | NA   |
| Y | N | N | N | NA | 3 | 3 |   | N   | NA   |
| Y | N | N | N | NA | 3 |   | 2 | N   | NA   |
| Y | N | N | N | NA | 3 |   |   | 2 N | NA   |
| Y | N | N | N | NA | 3 |   |   | 2 N | NA   |
| Y | N | N | N | NA | 3 |   |   | 2 N | NA   |
| Y | N | N | N | NA | 3 |   |   | 2 N | NA   |
| Y | N | N | N | NA | 3 |   |   | 1 N | NA   |
| Y | N | N | N | NA | 3 |   |   | 2 N | NA   |
| Y | N | N | N | NA | 3 |   | 2 | N   | NA   |
| Y | N | N | N | NA | 3 |   | 2 | N   | NA   |
| Y | N | N | N | NA | 3 | 2 |   | N   | NA   |
| Y | N | N | N | NA | 3 | 3 |   | N   | NA   |
| Y | N | N | N | NA | 3 | 2 |   | N   | NA   |
| Y | N | N | N | NA | 3 |   | 3 | N   | NA   |
| Y | N | N | N | NA | 3 |   | 3 | N   | NA   |
| Y | N | N | N | NA | 3 |   | 2 | N   | NA   |
| Y | N | N | N | NA | 3 | 2 |   | N   | NA   |
| Y | N | N | N | NA | 3 |   |   | 2 N | NA   |
| Y | N | N | N | NA | 3 |   |   | 2 N | NA   |
| Y | N | N | N | NA | 3 |   |   | 2 N | NA   |
| Y | N | N | N | NA | 3 |   |   | 2 N | NA   |
| Y | N | N | N | NA | 3 |   |   | 2 N | NA   |
| Y | N | N | N | NA | 3 |   |   | 2 N | NA   |
| Y | N | N | N | NA | 3 |   | 2 | N   | NA   |
| Y | N | N | N | NA | 3 | 3 |   | N   | NA   |
| Y | N | N | N | NA | 3 | 3 |   | N   | NA   |
| Y | N | N | N | NA | 3 |   | 1 | N   | NA   |
| Y | N | N | N | NA | 3 |   |   | 2 Y | R NA |
| Y | N | N | N | NA | 3 |   |   | 2 N | NA   |
| Y | N | N | N | NA | 3 |   | 2 | N   | NA   |
| Y | N | N | N | NA | 3 | 2 |   | Y   | R NA |
| Y | N | N | N | NA | 3 | 2 |   | N   | NA   |
| Y | N | N | N | NA | 3 | 2 |   | Y   | R NA |
| Y | N | N | N | NA | 3 | 2 |   | N   | NA   |
| Y | N | N | N | NA | 3 | 2 |   | Y   | R NA |
| Y | N | N | N | NA | 3 |   | 3 | N   | NA   |
| Y | N | N | N | NA | 3 |   | 3 | N   | NA   |
| Y | N | N | N | NA | 3 |   | 2 | N   | NA   |
| Y | N | N | N | NA | 3 |   |   | 3 N | NA   |
| Y | N | N | N | NA | 3 | 3 |   | N   | NA   |
| Y | N | N | N | NA | 3 | 2 |   | Y   | R NA |
| Y | N | N | N | NA | 3 | 2 |   | Y   | R NA |
| Y | N | N | N | NA | 3 | 3 |   | N   | NA   |
| Y | N | N | N | NA | 3 | 3 |   | N   | NA   |

|   |   |   |   |    |   |   |   |   |      |
|---|---|---|---|----|---|---|---|---|------|
| Y | N | N | N | NA | 3 | 3 |   | N | NA   |
| Y | N | N | N | NA | 3 | 2 |   | N | NA   |
| Y | N | N | N | NA | 3 | 2 |   | N | NA   |
| Y | N | N | N | NA | 3 | 3 |   | N | NA   |
| Y | N | N | N | NA | 3 | 1 |   | N | NA   |
| Y | N | N | N | NA | 3 | 3 |   | N | NA   |
| Y | N | N | N | NA | 3 | 2 |   | N | NA   |
| Y | N | N | N | NA | 3 | 2 |   | N | NA   |
| Y | N | N | N | NA | 3 |   | 2 | N | NA   |
| Y | N | N | N | NA | 3 | 2 |   | N | NA   |
| Y | N | N | N | NA | 3 | 1 |   | Y | R NA |
| Y | N | N | N | NA | 3 |   | 2 | N | NA   |
| Y | N | N | N | NA | 3 | 2 |   | N | NA   |
| Y | N | N | N | NA | 3 | 2 |   | N | NA   |
| Y | N | N | N | NA | 3 |   | 2 | N | NA   |
| Y | N | N | N | NA | 3 |   | 2 | N | NA   |
| Y | N | N | N | NA | 3 | 2 |   | N | NA   |
| Y | N | N | N | NA | 3 | 2 |   | N | NA   |
| Y | N | N | N | NA | 3 |   | 2 | N | NA   |
| Y | N | N | N | NA | 3 |   | 2 | N | NA   |
| Y | N | N | N | NA | 3 | 2 |   | Y | R NA |
| Y | N | N | N | NA | 3 | 2 |   | N | NA   |
| Y | N | N | N | NA | 3 |   | 2 | N | NA   |
| Y | N | N | N | NA | 3 | 2 |   | Y | R NA |
| Y | N | N | N | NA | 3 | 2 |   | N | NA   |
| Y | N | N | N | NA | 3 | 1 |   | N | NA   |
| Y | N | N | N | NA | 3 |   | 1 | N | NA   |
| Y | N | N | N | NA | 3 |   | 2 | N | NA   |
| Y | N | N | N | NA | 3 | 2 |   | N | NA   |
| Y | N | N | N | NA | 3 | 1 |   | N | NA   |
| Y | N | N | N | NA | 3 |   | 2 | N | NA   |
| Y | N | N | N | NA | 3 | 2 |   | N | NA   |
| Y | N | N | N | NA | 3 | 2 |   | N | NA   |
| Y | N | N | N | NA | 3 |   | 3 | N | NA   |
| Y | N | N | N | NA | 3 |   | 2 | N | NA   |
| Y | N | N | N | NA | 3 |   | 1 | N | NA   |
| Y | N | N | N | NA | 3 |   | 2 | N | NA   |
| Y | N | N | N | NA | 3 | 1 |   | N | NA   |
| Y | N | N | N | NA | 3 | 2 |   | N | NA   |
| Y | N | N | N | NA | 3 | 1 |   | N | NA   |
| Y | N | N | N | NA | 3 |   | 3 | N | NA   |
| Y | N | N | N | NA | 3 |   | 2 | N | NA   |
| Y | N | N | N | NA | 3 | 2 |   | N | NA   |
| Y | N | N | N | NA | 3 | 2 |   | Y | R NA |
| Y | N | N | N | NA | 3 |   | 2 | N | NA   |

|   |   |   |   |    |   |   |   |   |   |   |    |
|---|---|---|---|----|---|---|---|---|---|---|----|
| Y | N | N | N | NA | 3 |   |   | 2 | N |   | NA |
| Y | N | N | N | NA | 3 | 2 |   |   | N |   | NA |
| Y | N | N | N | NA | 3 |   |   | 3 | Y | R | NA |
| Y | N | N | N | NA | 3 |   |   | 2 | N |   | NA |
| Y | N | N | N | NA | 3 |   |   | 2 | N |   | NA |
| Y | N | N | N | NA | 3 |   |   | 2 | N |   | NA |
| Y | N | N | N | NA | 3 | 1 |   |   | N |   | NA |
| Y | N | N | N | NA | 3 | 2 |   |   | N |   | NA |
| Y | N | N | N | NA | 3 |   | 2 |   | N |   | NA |
| Y | N | N | N | NA | 3 | 2 |   |   | Y | R | NA |
| Y | N | N | N | NA | 3 | 2 |   |   | Y | R | NA |
| Y | N | N | N | NA | 3 | 2 |   |   | N |   | NA |
| Y | N | N | N | NA | 3 | 2 |   |   | N |   | NA |
| Y | N | N | N | NA | 3 |   | 2 |   | N |   | NA |
| Y | N | N | N | NA | 3 |   |   | 3 | N |   | NA |
| Y | N | N | N | NA | 3 | 2 |   |   | N |   | NA |
| Y | N | N | N | NA | 3 | 2 |   |   | N |   | NA |
| Y | N | N | N | NA | 3 |   | 2 |   | N |   | NA |
| Y | N | N | N | NA | 3 | 1 |   |   | N |   | NA |
| Y | N | N | N | NA | 3 | 3 |   |   | N |   | NA |
| Y | N | N | N | NA | 3 |   |   | 2 | N |   | NA |
| Y | N | N | N | NA | 3 |   |   | 2 | N |   | NA |
| Y | N | N | N | NA | 3 | 1 |   |   | N |   | NA |
| Y | N | N | N | NA | 3 | 2 |   |   | Y | R | NA |
| Y | N | N | N | NA | 3 | 3 |   |   | Y | R | NA |
| Y | N | N | N | NA | 3 | 2 |   |   | Y | R | NA |
| Y | N | N | N | NA | 3 | 2 |   |   | Y | R | NA |
| Y | N | N | N | NA | 3 | 2 |   |   | Y | R | NA |
| Y | N | N | N | NA | 3 |   | 3 |   | N |   | NA |
| Y | N | N | N | NA | 3 | 3 |   |   | N |   | NA |
| Y | N | N | N | NA | 3 |   |   | 3 | N |   | NA |
| Y | N | N | N | NA | 3 |   |   | 3 | N |   | NA |
| Y | N | N | N | NA | 3 | 3 |   |   | N |   | NA |
| Y | N | N | N | NA | 3 | 3 |   |   | N |   | NA |
| Y | N | N | N | NA | 3 | 3 |   |   | N |   | NA |
| Y | N | N | N | NA | 3 | 3 |   |   | N |   | NA |
| Y | N | N | N | NA | 3 | 3 |   |   | Y | R | NA |
| Y | N | N | N | NA | 3 | 2 |   |   | N |   | NA |
| Y | N | N | N | NA | 3 | 2 |   |   | N |   | NA |
| Y | N | N | N | NA | 3 |   | 2 |   | N |   | NA |
| Y | N | N | N | NA | 3 |   | 2 |   | N |   | NA |
| Y | N | N | N | NA | 3 |   | 2 |   | N |   | NA |
| Y | N | N | N | NA | 3 |   | 2 |   | N |   | NA |
| Y | N | N | N | NA | 3 | 3 |   |   | N |   | NA |
| Y | N | N | N | NA | 3 | 3 |   |   | N |   | NA |
| Y | N | N | N | NA | 3 |   |   | 3 | N |   | NA |
| Y | N | N | N | NA | 3 |   |   | 2 | N |   | NA |

|   |   |   |   |    |   |   |   |   |   |      |
|---|---|---|---|----|---|---|---|---|---|------|
| Y | N | N | N | NA | 3 |   |   | 2 | N | NA   |
| Y | N | N | N | NA | 3 | 1 |   |   | N | NA   |
| Y | N | N | N | NA | 3 |   | 1 |   | N | NA   |
| Y | N | N | N | NA | 3 | 2 |   |   | N | NA   |
| Y | N | N | N | NA | 3 | 2 |   |   | N | NA   |
| Y | N | N | N | NA | 3 |   |   | 2 | Y | R NA |
| Y | N | N | N | NA | 3 |   |   | 2 | N | NA   |
| Y | N | N | N | NA | 3 |   |   | 2 | N | NA   |
| Y | N | N | N | NA | 3 |   |   | 2 | N | NA   |
| Y | N | N | N | NA | 3 |   |   | 2 | N | NA   |
| Y | N | N | N | NA | 3 | 2 |   |   | N | NA   |
| Y | N | N | N | NA | 3 |   |   | 2 | N | NA   |
| Y | N | N | N | NA | 3 |   |   | 2 | N | NA   |
| Y | N | N | N | NA | 3 | 2 |   |   | N | NA   |
| Y | N | N | N | NA | 3 | 2 |   |   | Y | R NA |
| Y | N | N | N | NA | 3 | 2 |   |   | N | NA   |
| Y | N | N | N | NA | 3 | 2 |   |   | N | NA   |
| Y | N | N | N | NA | 3 | 2 |   |   | Y | R NA |
| Y | N | N | N | NA | 3 | 2 |   |   | N | NA   |
| Y | N | N | N | NA | 3 | 2 |   |   | N | NA   |
| Y | N | N | N | NA | 3 |   | 3 |   | N | NA   |
| Y | N | N | N | NA | 3 |   | 2 |   | N | NA   |
| Y | N | N | N | NA | 3 |   |   | 2 | N | NA   |
| Y | N | N | N | NA | 3 | 2 |   |   | Y | R NA |
| Y | N | N | N | NA | 3 |   |   | 2 | N | NA   |
| Y | N | N | N | NA | 3 |   |   | 1 | Y | R NA |
| Y | N | N | N | NA | 3 | 2 |   |   | N | NA   |
| Y | N | N | N | NA | 3 | 2 |   |   | Y | R NA |
| Y | N | N | N | NA | 3 |   |   | 2 | Y | R NA |
| Y | N | N | N | NA | 3 | 2 |   |   | N | NA   |
| Y | N | N | N | NA | 3 | 2 |   |   | N | NA   |
| Y | N | N | N | NA | 3 | 2 |   |   | N | NA   |
| Y | N | N | N | NA | 3 | 1 |   | 1 | N | NA   |
|   |   |   |   | NA |   |   |   |   |   | NA   |
| Y | N | N | N | NA | 3 |   |   | 2 | N | NA   |
| Y | N | N | N | NA | 3 |   |   | 2 | N | NA   |
| Y | N | N | N | NA | 3 |   |   | 2 | Y | R NA |
| Y | N | N | N | NA | 3 |   |   | 2 | Y | R NA |
| Y | N | N | N | NA | 3 | 2 |   |   | N | NA   |
| Y | N | N | N | NA | 3 | 1 |   | 1 | N | NA   |
| Y | N | N | N | NA | 3 | 1 |   | 1 | N | NA   |
| Y | N | N | N | NA | 3 |   | 2 |   | N | NA   |
| Y | N | N | N | NA | 3 |   | 2 |   | N | NA   |
| Y | N | N | N | NA | 3 |   | 2 |   | N | NA   |
| Y | N | N | N | NA | 3 |   | 2 |   | N | NA   |

|   |   |   |   |    |   |   |   |     |      |
|---|---|---|---|----|---|---|---|-----|------|
| Y | N | N | N | NA | 3 |   | 1 | N   | NA   |
| Y | N | N | N | NA | 3 | 2 |   | N   | NA   |
| Y | N | N | N | NA | 3 |   | 2 | N   | NA   |
| Y | N | N | N | NA | 3 |   |   | 2 Y | R NA |
| Y | N | N | N | NA | 3 | 2 |   | Y   | R NA |
| Y | N | N | N | NA | 3 | 2 |   | Y   | R NA |
| Y | N | N | N | NA | 3 | 2 |   | Y   | R NA |
| Y | N | N | N | NA | 3 | 2 |   | Y   | R NA |
| Y | N | N | N | NA | 3 | 2 |   | Y   | R NA |
| Y | N | N | N | NA | 3 | 2 |   | Y   | R NA |
| Y | N | N | N | NA | 3 |   |   | 2 N | NA   |
| Y | N | N | N | NA | 3 | 2 |   | N   | NA   |
| Y | N | N | N | NA | 3 | 2 |   | N   | NA   |
| Y | N | N | N | NA | 3 | 1 |   | N   | NA   |
| Y | N | N | N | NA | 3 |   |   | 2 N | NA   |
| Y | N | N | N | NA | 3 | 2 |   | N   | NA   |
| Y | N | N | N | NA | 3 | 2 |   | N   | NA   |
| Y | N | N | N | NA | 3 |   |   | 2 N | NA   |

| q76a                     | q76b                     | q76c                  |
|--------------------------|--------------------------|-----------------------|
| PARACETAMOL              | NESTRIM                  |                       |
| COUGH SYRUP              | PARACETAMOL              | CO-TRIMOZOLE          |
| PARACETAMOL              |                          |                       |
| PARACETAMOL              | NESTRIM                  | COUGH SYRUP (SAMALIN) |
| PARACETAMOL              | PRAZIQUANTEL             |                       |
| PARACETAMOL              | ALUMINIUM HYDROXIDE      |                       |
| PARACETAMOL              | METRONIDAZOLE            | WHITFIELD'S OINTMENT  |
| NESTRIM                  | PARACETAMOL              | SAMALIN               |
| PARACETAMOL              | ALUMINIUM HYDROXIDE      |                       |
| PARACETAMOL              |                          |                       |
| PARACETAMOL SYRUP        |                          |                       |
| PARACETAMOL              |                          |                       |
| O.R.S                    | PARACETAMOL              |                       |
| PARACETAMOL              |                          |                       |
| PARACETAMOL              |                          |                       |
| PARACETAMOL              |                          |                       |
| PARACETAMOL              | CHLORPHENIRAMINE MALEATE |                       |
| FOLIC ACID               | DICLOFEN                 |                       |
| CHLORPHENIRAMINE MALEATE | PARACETAMOL              |                       |
| PARACETAMOL              | MULTIVITE                |                       |
| PARACETAMOL              | MULTIVITAMIN             |                       |
| PARACETAMOL              | MULTIVITE                |                       |
| PARACETAMOL              | FOLIC ACID               |                       |
| MULTIVITAMIN             | PARACETAMOL              |                       |
| ALUMINIUM HYDROXIDE      | PARACETAMOL              |                       |
| MULTIVITAMIN             | PARACETAMOL              |                       |
| PARACETAMOL              | MULTIVITAMIN             |                       |
| MULTIVITAMIN             | PARACETAMOL              | CLERMUC SYRUP         |
| PARACETAMOL              | MULTIVITE                |                       |
| PARACETAMOL              | MULTIVITE                | ALUMINIUM HYDROXIDE   |
| PARACETAMOL              | MOLTIVITE                |                       |
| PARACETAMOL              | MULTIVITE                |                       |
| IBUPROFEN                | FOLIC ACID               |                       |
| IBUPROFEN                | AMOXYCILLIN              |                       |
| DICLOFEN                 |                          |                       |
| METRONIDAZOL             | AMOXYCILLIN              | PARACETAMOL           |
| PARAMOL                  | MULTIVITAMIN             |                       |
| PARACETAMOL              | MULTIVITE                |                       |
| MULTIVIT                 | PARACETAMOL              |                       |
| PARACETAMOL              | NESTRIM                  |                       |
| CLEMUCDS                 |                          |                       |
| MUITIVITE                | PARACETAMOL              |                       |
| PARACETAMOL SYRUP        | NOVAGYL SUSPENSION       |                       |
| PARACETAMOL SYRUP        | MULTIVITAMIN SYRUP       |                       |
| PARACETAMOL              | O.R.S                    |                       |



|                          |                      |                       |
|--------------------------|----------------------|-----------------------|
| PARACETAMOL              | MULTIVITAMIN         | KINAMOX               |
| PARACETAMOL              | KINAMOX              |                       |
| PARACETAMOL              | PROFEN               | MULITIVITE            |
| PARACETAMOL              | MULTIVITE            |                       |
| PARACETAMOL              | MULTIVITE            | AMOXYCILLIN           |
| PARACETAMOL              | MULTIVITAMIN TAB     |                       |
| AMOXYCILLIN TAB          | PARACETAMOL          |                       |
| MULTIVITE TAB            | PARACETAMOL          |                       |
| PARACETAMOL              | MULTIVITE            |                       |
| NESTRIM                  | MUSCLE HEAT RUB      | PARACETAMOL           |
| FOLIC ACID               | PARACETAMOL          |                       |
| PARACETAMOL              |                      |                       |
| SYR CARBOCISTEINE        | TAB PARACETAMOL      | TAB CO-TRIMAZOLE      |
| PARACETAMOL              | MULTIVITE            |                       |
| TAB EMGIPROFEN           | MULTIVITAMIN TAB     |                       |
| PRARCETAMOL              | MULTIVITE            |                       |
| MULTIVITAMIN SYRUP       | COTRIZOLE SUSPENSION | PARACETAMOL SYRUP     |
| PARACETAMOL SYRUP        | SAMALIN COUGH SYRUP  | INHIRFIELD'S OINTMENT |
| SYRUP PARACETAMOL        | SAMALIN COUGH SYRUP  |                       |
| PARACETAMOL              | MULTIVITE            |                       |
| PARACETAMOL              | EXPECTOLYN           | AMOXYCILLIN POWDER    |
| MULTIVITAMIN SYRUP       | PARACETAMOL SYRUP    |                       |
| MULTIVITE TAB            | FOLIC ACID           | PARACETAMOL TAB       |
| PARACETAMOL              | MULTIVITE            | ALIVERFENAC GEL       |
| LINTUS                   | CO-TRIMAZOL          | PARACETAMOL           |
| PARACETAMOL              | DICLOFENAC GEL       | MULTIVITE             |
| PARACETAMOL              | RONFENAC GEL         |                       |
| IBRUFEN TAB              | COUGH SYRUP          |                       |
| SAMALIN COUGH SYRUP      | PARACETAMOL SYRUP    |                       |
| PARACETAMOL              | MULTIVITE            |                       |
| PARACETAMOL              | MULTIVITE            |                       |
| TAB MULTIVITAMIN         | TAB PARACETAMOL      |                       |
| NESTRIM                  | PARACETAMOL          | MUSCLE HEALTH BUB     |
| BRUFEN                   | MULTIVITE            |                       |
| ANATEN                   | MULTIVITE            |                       |
| PARAMOL                  | MULTIVITE            |                       |
| PARAMOL                  | MULTIVITE            |                       |
| PARAMOL                  | MULTIVITE            |                       |
| PARAMOL                  | MULTIVITE            |                       |
| PARAMOL                  | MULTIVITE            |                       |
| PARAMOL                  | MULTIVITE            |                       |
| DEPTRIN                  | PARAMOL              | MULTIVITE             |
| METRONIDAZOLE SUSPENSION | PARACETAMOL SYRUP    |                       |
| METRONIDAZOLE SUSPENSION | PARACETAMOL SYRUP    |                       |
|                          | MULTIVITAMIN TAB     |                       |
| AMOXYCILLIN SUSPENSION   | PARACETAMOL SYRUP    |                       |
| TOBUFEN TAB              |                      |                       |

|                           |                          |                      |
|---------------------------|--------------------------|----------------------|
| PARAMOL                   | MULTIVITE                |                      |
| PARAMOL                   | MULTIVITAMIN SYRUP       |                      |
| CHLORPHENIRAMIN           | DEPRIN                   | PARAMOL              |
| PARAMOL                   | MULTIVITE                |                      |
| MULTIVITE                 | PARAMOL                  |                      |
| SAMALIN SYRUP             | PARACETAMOL TAB          | AMOXYCILLIN CAPSULES |
| SAMALIN SYRUP             | EMGIPROFEN TAB           | AMOXYCILLIN CAPSULES |
| SAMALIN SYRUP             | AMOXYCILLIN CAPSULES     | PARACETAMOL TAB      |
| PARACETAMOL SYRUP         | AMOXYCILLIN SUSPENSION   |                      |
| METRONIDAZOLE SUSPENSION  | PARACETAMOL SYRUP        |                      |
| FOLIC ACID                | PARACETAMOL TAB          | MULTIVITAMIN TAB     |
| EMGIPROFEN SYRUP          | MULTIVITE SYRUP          |                      |
| EMGIPROFEN                | MULTIVITE                |                      |
| BRUFEN                    | MULTIVITE                |                      |
| PARAMOL                   | MULTIVITE                |                      |
| MULTIVITE                 | ANFEN IBUPROFEN          |                      |
| PARAMOL                   |                          |                      |
| PARAMOL                   | MULTIVITE                |                      |
| PARAMOL                   | AMOXICILLIN              |                      |
| PARAMOL                   | MULTIVITE                |                      |
| PARACETAMOL SYRUP         | AMOXYCILLIN SUSPENSION   |                      |
| METRONIDAZOLE SUSPENSION  | HAEMOGLOBIN SYRUP        | PARACETAMOL SYRUP    |
| PARACETAMOL TAB           |                          |                      |
| METRONIDAZOLE SUSPENSION  | PARACETAMOL SYRUP        |                      |
| PARACETAMOL TAB           | AMOXYCILLIN SUSPENSION   |                      |
| PARACETAMOL TAB           |                          |                      |
| EMGIPROFEN                | MULTIVITE                |                      |
| MULTIVITE                 |                          |                      |
| MULTIVITAMIN              | IBUPROFEN                |                      |
| AMOXICILLIN POWDER        | PARAMOL                  |                      |
| MULTIVITAMIN TAB          | PARACETAMOL TAB          |                      |
| PARAMOL                   | MULTIVITE                |                      |
| PARAMOL                   | MULTIVITE                |                      |
| SAMALIN SYRUP             | AMOXYCILLIN SUSPENSION   |                      |
| CO-TRIMOXAZOLE            | PARACETAMOL SYRUP        |                      |
| CO-TRIMOXAZOLE SUSPENSION | PARACETAMOL SYRUP        |                      |
| PARACETAMOL SYRUP         |                          |                      |
| CO-TRIMOXAZOLE SUSPENSION | METRONIDAZOLE SUSPENSION |                      |
| PARAMOL                   |                          |                      |
| PARAMOL                   | MULTIVITE                |                      |
|                           |                          |                      |
| DICLOFENAC                |                          |                      |
| TOBUFEN TAB               | AMOXYCILLIN CAPSULE      |                      |
| MULTIVITAMIN SYRUP        | PARACETAMOL SYRUP        |                      |
| SAMALIN COUGH SYRUP       | AMOXYCILLIN SUSPENSION   | PARACETAMOL SYRUP    |
| TOBUFEN TAB               | MULTIVITAMIN TAB         |                      |
| DICLOFENAC TAB            |                          |                      |

|                          |                           |                    |
|--------------------------|---------------------------|--------------------|
| FOLIC ACID               | TAB TOBUFEN               |                    |
| FLUCLOXACILLIN SYRUP     | PARACETAMOL SYRUP         |                    |
| PARACETAMOL SYRUP        | CLOTRIMAZOLE CREAM        |                    |
| FOLIC ACID               | TOBUFEN TAB               |                    |
| METRONIDAZOLE SUSPENSION | CO-TRIMOXAZOLE SUSPENSION | PARACETAMOL SYRUP  |
| MULTIVITE TABS           | DICLOFINIC TABS           |                    |
| MUCOTIN                  | MULTIVITE                 | PARAMOL            |
| AMOXYCILLIN SUSPENSION   | CO-TRIMOXAZOLE SUSPENSION | PARACETAMOL SYRUP  |
| METRONIDAZOLE SUSPENSION | PARACETAMOL SYRUP         |                    |
| LINCTUS COUGH SYRUP      | AMOXYCILLIN SUSPENSION    | PARACETAMOL SYRUP  |
| AMOXYCILLIN SUSPENSION   | LINCTUS COUGH SYRUP       | PARACETAMOL SYRUP  |
| ALUMINIUM HYDROXIDE TAB  | PARACETAMOL TAB           |                    |
| AMOXYCILLIN SUSPENSION   | PARACETAMOL TAB           |                    |
| PARAMOL SYRUP            | MULTIVITE SYRUP           | AMOXICILINE POWDER |
| PARAMOL SYRUP            | MULTIVITE SYRUP           |                    |
| MUCOTIN SYRUP            | MULTIVITE SYRUP           | PARAMOL SYRUP      |
| PARAMOL SYRUP            | MULTIVITE SYRUP           |                    |
| PARAMOL                  | MULTIVITE                 |                    |
| MULTIVITE                | PARAMOL                   |                    |
| PARAMOL                  | MULTIVITE                 |                    |
| PARAMOL                  | MULTIVITE                 |                    |
| MULTIVITAMIN TAB         | PARACETAMOL               |                    |
| PARACETAMOL TAB          |                           |                    |
| METRONIDAZOLE SUSPENSION |                           |                    |
| MULTIVITAMIN TAB         | PARACETAMOL TAM           |                    |
| MULTIVITAMIN TAB         |                           |                    |
| MULTIVITAMIN SYRUP       | PARACETAMOL SYRUP         |                    |
| PARAMOL                  | MULTIVITE                 |                    |
| PARAMOL                  | DEPTRIN                   |                    |
| MULTIVITAMIN SYRUP       | PARACETAMOL SYRUP         |                    |
| MULTIVITAMIN SYRUP       | PARACETAMOL SYRUP         |                    |
| MULTIVITAMIN TAB         | PARACETAMOL TAB           |                    |
| PARAMOL                  | MULTIVITE                 |                    |
| PARACETAMOL SYRUP        | AMOXICILLIN SUSPENSION    |                    |
| MULTIVITE                | PARAMOL                   |                    |
| MULTIVITE TABS           | DICLOFEN                  |                    |
| AMOXICILLIN SUSPENSION   |                           |                    |
| PARAMOL SYRUP            | METRONIDAZOL              |                    |
| PARACETAMOL SYRUP        | MULTIVITAMIN SYRUP        |                    |
| PARACETAMOL SYRUP        | ORS                       |                    |
| PARAMOL SYRUP            | MULTIVITE SYRUP           |                    |
| PARACETAMOL SYRUP        | MULTIVITE SYRUP           |                    |
| FOLIC ACID               | PARAMOL                   |                    |
| PROFEN SYRUP             | MULTIVITE SYRUP           |                    |
| IBUPROFEN SUSPENSION     | MULTIVITE TAB             |                    |
| AMOXICILLIN SUSPENSION   | MULTIVITAMIN SYRUP        | PARACETAMOL SYRUP  |
| METRONIDAZOLE TABLETS    | PARACETAMOL SYRUP         |                    |

|                              |                          |                 |
|------------------------------|--------------------------|-----------------|
| AMOXICILLIN SUSPENSION       | PARACETAMOL SYRUP        |                 |
| PARACETAMOL SYRUP            |                          |                 |
| MULTIVITAMIN TAB             | DICLOFENAC TAB           | FOLIC ACID      |
| ANFEN IBUPROFEN              | MULTIVITE                |                 |
| PARAMOL                      | MULTIVITE                |                 |
| PARAMOL SYRUP                | MULTIVITE SYRUP          |                 |
| MULTIVITE SYRUP              | PARAMOL SYRUP            |                 |
| PRUFEN                       | MULTIVITE                |                 |
| PARAMOL                      | MULTIVITE                |                 |
| FLUCLOXACILLIN ORAL SOLUTION | PARACETAMOL SYRUP        |                 |
| HAEMOGLOBIN SYRUP            | PARACETAMOL SYRUP        |                 |
| PARACETAMOL SYRUP            |                          |                 |
| CO-TRIMOXAZOLE TAB           | PARACETAMOL SYRUP        |                 |
| PARAMOL                      | MULTIVITE                |                 |
| PARAMOL                      | FOLIC ACID               |                 |
| SAMALIN SYRUP                |                          |                 |
| ORS                          | PARACETAMOL SYRUP        |                 |
| EMGIPIROFEN                  | MULTIVITE SYRUP          |                 |
| PARAMOL                      | MULTIVITAMIN SYRUP       |                 |
| DICLOFENAC                   | MULTIVITE                |                 |
| PARAMOL                      | MULTIVITAMIN             |                 |
| PARAMOL                      | MULTIVITE                |                 |
| PARAMOL                      | MULTIVITE                |                 |
| TAB PARACETAMOL              |                          |                 |
| DICLOFENAC GEL               |                          |                 |
| PARACETAMOL TAB              |                          |                 |
| GENTAMICIN EYE DROPS         | TAB PARACETAMOL          |                 |
| TAB PARACETAMOL              | FLUCOXALLIN SUSPENSION   |                 |
| DICLOFEN                     | MULTIVITE                |                 |
| PARAMOL                      | MULTIVITE                |                 |
| PARAMOL                      | MULTIVITE                |                 |
| PARAMOL                      | MULTIVITE                |                 |
| DICLOFEN                     | MULTIVITE                |                 |
| EMGIFLO CAPSULE              | DICLOPAC TAB             | TAB CETZIN      |
| PARACETAMOL TAB              |                          |                 |
| TAB DICLOPAC                 |                          |                 |
| FLUCLOXACILLIN CAPSULE       |                          |                 |
| FLUCLOXACILLIN SYRUP         | METRONIDAZOLE SUSPENSION | TAB PARACETAMOL |
| ORS                          | TAB PARACETAMOL          |                 |
| IBUPROFEN                    | MULTIVITE                |                 |
| PARAMOL                      | MULTIVITE SYRUP          |                 |
| MULTIVITE SYRUP              | AMOXYCILLIN POWDER       |                 |
| IBUPROFEN                    | MULTIVITE                |                 |
| TAB MULTIVITAMIN             | TAB PARACETAMOL          |                 |
| MULTIVITAMIN TAB             | PARACETAMOL TAB          |                 |
| MULTIVITE                    | PARAMOL                  |                 |
| TAB PARACETAMOL              | TAB MULTIVITAMIN         |                 |

|                          |                           |                               |
|--------------------------|---------------------------|-------------------------------|
| TAB MULTIVITAMIN         | TAB PARACETAMOL           |                               |
| PARAMOL                  |                           |                               |
| PARAMOL                  | CHLORPHENIRAMINE          |                               |
| TAB PARACETAMOL          | TAB MULTIVIMIN            |                               |
| LINCTUS COUGH SYRUP      | MULTIVITAMIN TAB          | PARACETAMOL TAB               |
| MULTIVITAMIN TAB         |                           |                               |
| SAMALIN SYRUP            | MULTIVITAMIN              | PARACETAMOL TAB ORS           |
| FOLIC ACID               | MULTIVITAMIN TAB          |                               |
| MULTIVITAMIN TAB         | FOLIC ACID                |                               |
| PARAMOL                  | MULTIVITE                 |                               |
| MULTIVITAMIN TAB         | PARACETAMOL TAB           |                               |
| AMOXICILLIN SUSPENSION   | LINCTUS COUGH SYRUP       | PARACETAMOL TAB               |
| PARAMOL                  | MULTIVITE                 |                               |
| HYDROXIDE TAB            | FLUXAKIN CAPSULES         | PARACETAMOL TAB               |
| FLUXAKIN CAPSULES        | MULTIVITAMIN TAB          | PARACETAMOL TAB               |
| COTRIZOLE SUSPENSION     | LINCTUS COUGH SYRUP       | PARACETAMOL TAB               |
| COTRIZOLE SUSPENSION     | LINCTUS COUGH SYRUP       | MULTIVITAMIN TAB & PARACETAMO |
| AMOXICILLIN SUSPENSION   | PARACETAMOL TAB           |                               |
| METRONIDAZOLE SUSPENSION | CO-TRIMOXAZOLE SUSPENSION |                               |
| PARACETAMOL TAB          | MULTIVITAMIN TAB          | ALBENDAZOLE TAB               |
| MULTIVITAMIN TAB         | PARACETAMOL TAB           |                               |
| AMOXICILLIN CAPSULES     | PARACETAMOL TAB           |                               |
| TOBUFEN TABS             | MULTIVITE TABS            |                               |
| PARAMOL                  | MULTIVITE                 |                               |
| PARAMOL                  | DEPTRIN                   |                               |
| PARACETAMOL TAB          | METRONIDAZOLE TAB         |                               |
| AMOXICILLIN SUSPENSION   | PARACETAMOL TAB           |                               |
| AMOXICILLIN SUSPENSION   | LINCTUS COUGH SYRUP       | PARACETAMOL TAB               |
| MULTIVITAMIN TABLETS     | PARACETAMOL TABLETS       |                               |
| PARACETAMOL TABLETS      | LINCTUS COUGH SYRUP       |                               |
| AMOXICILLIN SUSPENSION   | LINCTUS COUGH SYRUP       | PARACETAMOL TAB               |
| EMGIPIFEN                |                           |                               |
| MULTIVITE                | PARAMOL                   |                               |
| PARAMOL                  | MULTIVITE                 |                               |
| EMGIPIFEN                |                           |                               |
| PARACETAMOL TAB          | ALUMINIUM HYDROXIDE TAB   |                               |
| DEPTRIN TAB              | PARACETAMOL TAB           |                               |
| SAMALIN SYRUP            | DEPTRIN TAB               | PARACETAMOL TAB               |
| DEPTRIN TAB              | PARACETAMOL TAB           |                               |
| METRONIDAZOLE SUSPENSION | PARACETAMOL TAB           |                               |
| DEPTRIN TAB              | PARACETAMOL TAB           |                               |
| PARAMOL                  | MULTIVITE                 |                               |
| PARAMOL                  | MULTIVITE                 |                               |
| CARBOZAP                 | PARAMOL                   | MULTIVITE                     |
| PARAMOL                  | MULTIVITE                 |                               |
| PARAMOL                  | MULTIVITE                 |                               |
| PARAMOL                  | MULTIVITE                 |                               |

|                          |                        |                               |
|--------------------------|------------------------|-------------------------------|
| MUCOTIN SYRUP            | PARAMOL SYRUP          |                               |
| MULTIVITE                | PARAMOL                |                               |
| PARAMOL                  | MULTIVITE              |                               |
| SAMALIN SYRUP            | PARACETAMOL SYRUP      | AMOXYCILLIN SUSPENSION        |
| NEXCOFER BLOOD TONIC     | AMOXYCILLIN SUSPENSION | LINCTUS SYRUP & PARACETAMOL S |
| COTRIZOLE SUSPENSION     | PARACETAMOL SYRUP      |                               |
| METRONIDAZOLE SUSPENSION | PARACETAMOL SYRUP      |                               |
| COTRIZOLE SUSPENSION     | HAEMOGLOBIN SYRUP      | PARACETAMOL SYRUP             |
| AMOXYCILLIN SUSPENSION   | PARACETAMOL SYRUP      |                               |
| AMOXYCILLIN SUSPENSION   | LINCTUS SYRUP          | PARACETAMOL SYRUP             |
| FLUCLOXACILLIN SOLUTION  | PARACETAMOL SYRUP      |                               |
| HAEMOGLOBIN SYRUP        | PARACETAMOL TAB        |                               |
| PARACETAMOL TABLETS      | METRONIDAZOLE TABLETS  |                               |
| PARACETAMOL SYRUP        |                        |                               |
| PARACETAMOL SYRUP        | MULTIVITAMIN TABLETS   |                               |
| MULTIVITAMIN TAB         | PARACETAMOL TAB        | SAMALIN SYRUP                 |
| PARAMOL                  | MULTIVITE              |                               |
| PARAMO TABS              | MULTIVITE TABS         |                               |

[illegible]

[illegible]



[illegible]

[illegible]

[illegible]

[illegible]

|   |   |   |   |    |    |    |    |    |    |    |    |    |    |    |    |
|---|---|---|---|----|----|----|----|----|----|----|----|----|----|----|----|
| N | I | Y | N | 88 | 88 | 88 | 88 | 88 | 88 | 88 | 88 | 88 | 88 | 88 | 88 |
| N | I | Y | N | 88 | 88 | 88 | 88 | 88 | 88 | 88 | 88 | 88 | 88 | 88 | 88 |
| N | I | Y | N | 88 | 88 | 88 | 88 | 88 | 88 | 88 | 88 | 88 | 88 | 88 | 88 |
| Y | I | Y | N | 88 | 88 | 88 | 88 | 88 | 88 | 88 | 88 | 88 | 88 | 88 | 88 |
| N | I | Y | N | 88 | 88 | 88 | 88 | 88 | 88 | 88 | 88 | 88 | 88 | 88 | 88 |
| N | I | Y | N | 88 | 88 | 88 | 88 | 88 | 88 | 88 | 88 | 88 | 88 | 88 | 88 |
| N | I | Y | N | 88 | 88 | 88 | 88 | 88 | 88 | 88 | 88 | 88 | 88 | 88 | 88 |
| N | I | Y | N | 88 | 88 | 88 | 88 | 88 | 88 | 88 | 88 | 88 | 88 | 88 | 88 |
| N | I | Y | N | 88 | 88 | 88 | 88 | 88 | 88 | 88 | 88 | 88 | 88 | 88 | 88 |
| Y | I | Y | N | 88 | 88 | 88 | 88 | 88 | 88 | 88 | 88 | 88 | 88 | 88 | 88 |
| Y | I | Y | N | 88 | 88 | 88 | 88 | 88 | 88 | 88 | 88 | 88 | 88 | 88 | 88 |
| N | I | Y | N | 88 | 88 | 88 | 88 | 88 | 88 | 88 | 88 | 88 | 88 | 88 | 88 |
| Y | I | Y | N | 88 | 88 | 88 | 88 | 88 | 88 | 88 | 88 | 88 | 88 | 88 | 88 |
| N | I | Y | N | 88 | 88 | 88 | 88 | 88 | 88 | 88 | 88 | 88 | 88 | 88 | 88 |
| N | I | Y | N | 88 | 88 | 88 | 88 | 88 | 88 | 88 | 88 | 88 | 88 | 88 | 88 |
| Y | I | Y | N | 88 | 88 | 88 | 88 | 88 | 88 | 88 | 88 | 88 | 88 | 88 | 88 |
| N | I | Y | N | 88 | 88 | 88 | 88 | 88 | 88 | 88 | 88 | 88 | 88 | 88 | 88 |
| N | I | Y | Y | No | No | No | Ye | No | No | No | No | No | No | No | No |

| q81o | q81os            | q82 | q83ant1 | q83ant1a                                 |
|------|------------------|-----|---------|------------------------------------------|
|      | 88 NA            | 2   | 1       | DUO-COTECXIN                             |
|      | 88 NA            | 2   | 1       | DUO-COTECXIN                             |
|      | 88 NA            | 2   | 1       | DUO-COTECXIN                             |
|      | 88 NA            | 2   | 1       | DUO-COTECXIN                             |
|      | 88 NA            | 2   | 1       | DUO-COTECXIN                             |
|      | 88 NA            | 2   | 1       | DUO-COTECXIN                             |
|      | 88 NA            | 2   | 1       | DUO-COTECXIN                             |
|      | 88 NA            | 2   | 1       |                                          |
|      | 88 NA            | 2   | 1       | DUO-COTECXIN                             |
|      | 88 NA            | 2   | 1       | DUO-COTECXIN                             |
|      | 88 NA            | 2   | 1       | DUO-COTECXIN                             |
|      | 88 NA            | 2   | 1       |                                          |
|      | 88 NA            | 2   | 1       | DUO-COTECXIN                             |
|      | 88 NA            | 2   | 1       | DUO-COTECXIN                             |
|      | 88 NA            | 2   | 1       | DUO-COTECXIN                             |
| Ye   | LOSS OF APPETCFE | 2   | 1       | DUO-COTECXIN                             |
|      | 88 NA            | 2   | 1       |                                          |
|      | 88 NA            | 2   | 1       | DUO-COTECXIN                             |
|      | 88 NA            | 2   | 1       | DUO-COTECXIN                             |
|      | 88 NA            | 2   | 1       | DUO-COTEXCIN                             |
|      | 88 NA            | 2   | 1       | DUO-COTECXIN                             |
|      | 88 NA            | 2   | 1       | DUO-COTECXIN                             |
|      | 88 NA            | 2   | 1       | DUO-COTECXIN                             |
|      | 88 NA            | 2   | 1       | DUO-COTECXIN                             |
|      | 88 NA            | 2   | 1       |                                          |
|      | 88 NA            | 2   | 1       |                                          |
| Ye   | FACE SWELLING    | 2   | 1       | DUO-COTECXIN                             |
|      | 88 NA            | 2   | 1       |                                          |
|      | 88 NA            | 2   | 1       |                                          |
| Ye   | PUFFY CHEEKS     | 2   | 1       | DUO-COTECXIN                             |
|      | 88 NA            | 2   | 1       | DUO-COTECXIN                             |
|      | 88 NA            | 2   | 1       | DUO-COTECXIN                             |
|      | 88 NA            | 2   | 1       | DUO-COTECXIN                             |
|      | 88 NA            | 2   | 1       | DUO-COTECXIN                             |
| Ye   | WEAKNESS         | 2   | 1       | DUO-COTECXIN                             |
| Ye   | WEAKNESS         | 2   | 1       | DUO-COTECXIN                             |
| Ye   | WEAKNESS         | 2   | 1       | DUO-COTECXIN                             |
|      | 88 NA            | 2   | 1       | DUO-COTECXIN                             |
|      | 88 NA            | 2   | 1       | DUO-COTECXIN                             |
|      | 88 NA            | 2   | 1       | DUO-COTECXIN                             |
|      | 88 NA            | 2   | 1       | DUO-COTECXIN                             |
|      | 88 NA            | 2   | 1       | DUO-COTECXIN                             |
| Ye   | WEAKNESS         | 2   | 1       | DUO-COTECXIN DIHYDRTEMISININ PIPERAQUINE |
|      | 88 NA            | 2   | 8       | NA                                       |
|      | 88 NA            | 2   | 8       | NA                                       |
|      | 88 NA            | 2   | 1       | DUO-COTECXIN                             |

|    |            |   |                |
|----|------------|---|----------------|
|    | 88 NA      | 2 | 1 DUO-COTECXIN |
|    | 88 NA      | 2 | 1 DUO-COTECXIN |
|    | 88 NA      | 2 | 1 DUO-COTECXIN |
|    | 88 NA      | 2 | 1 DUO-COTECXIN |
|    | 88 NA      | 2 | 1 DUO-COTECXIN |
| Ye | BODY PAINS | 2 | 8 NA           |
|    | 88 NA      | 2 | 8 NA           |
|    | 88 NA      | 2 | 1 DUO-COTECXIN |
|    | 88 NA      |   | 1              |
|    | 88 NA      | 2 | 1              |
|    | 88 NA      | 2 | 8 NA           |
|    | 88 NA      | 2 | 1 DUO-COTECXIN |
|    | 88 NA      | 2 | 8 NA           |
|    | 88 NA      | 2 | 1 DUO-COTECXIN |
|    | 88 NA      | 2 | 1 DUO-COTECXIN |
|    | 88 NA      | 2 | 1 DUO-COTECXIN |
|    | 88 NA      | 2 | 8 NA           |
|    | 88 NA      | 2 | 8 NA           |
|    | 88 NA      | 2 | 1 DUO-COTECXIN |
|    | 88 NA      | 2 | 1 DUO-COTECXIN |
|    | 88 NA      | 2 | 1 DUO-COTECXIN |
|    | 88 NA      | 2 | 8 NA           |
|    | 88 NA      | 2 | 1 DUO-COTECXIN |
|    | 88 NA      | 2 | 1 DUO-COTECXIN |
|    | 88 NA      | 2 | 1 DUO-COTECXIN |
|    | 88 NA      | 2 | 1 DUO-COTECXIN |
|    | 88 NA      | 2 | 1 DUO-COTECXIN |
|    | 88 NA      | 2 | 1 DUO-COTECXIN |
|    | 88 NA      | 2 | 1 DUO-COECSIN  |
|    | 88 NA      | 2 | 1 DUO-COTECXIN |
|    | 88 NA      | 2 | 1 DUO-COTECXIN |
|    | 88 NA      | 2 | 1 DUO-COTECXIN |
|    | 88 NA      | 2 | 1 DUO-COTECXIN |
|    | 88 NA      | 2 | 1 DUO-COTECXIN |
|    | 88 NA      | 2 | 1 DUO-COTECXIN |
|    | 88 NA      | 2 | 1 DUO-COTECXIN |
|    | 88 NA      | 2 | 1 DUO-COTECXIN |
| Ye | WEAKNESS   | 2 | 1 DUO-COTECXIN |
|    | 88 NA      | 2 | 1 DUO-COTECXIN |
|    | 88 NA      | 2 | 1 DUO-COTECXIN |
|    | 88 NA      | 2 | 1 DUO-COTECXIN |
|    | 88 NA      | 2 | 1 DUO-COTECXIN |
| No |            | 2 | 8 NA           |
| No |            | 2 | 8 NA           |
|    | 88 NA      | 2 | 8 NA           |
|    | 88 NA      | 2 | 1 DUO-COTECXIN |
|    | 88 NA      | 2 | 1 DUO-COTECXIN |

|                         |   |                                  |
|-------------------------|---|----------------------------------|
| 88 NA                   | 2 | 1 DUO-COTECXIN                   |
| 88 NA                   | 2 | 1 DUO-COTECXIN                   |
| 88 NA                   | 2 | 1 DUO-COTECXIN                   |
| 88 NA                   | 2 | 1 DUO-COTECXIN                   |
| 88 NA                   | 2 | 1 DUO-COTECXIN                   |
| 88 NA                   | 2 | 1 DUO-COTECXIN                   |
| 88 NA                   | 2 | 1 DUO-COTECXIN                   |
| 88 NA                   | 2 | 1 DUO-COTECXIN                   |
| 88 NA                   | 2 | 1 DUO-COTECXIN                   |
| 88 NA                   | 2 | 1 DUO-COTECXIN                   |
| 88 NA                   | 2 | 1 DUO-COTECXIN                   |
| 88 NA                   | 2 | 1 DUO-COTECXIN                   |
| 88 NA                   | 2 | 1 DUO-COTECXIN                   |
| 88 NA                   | 2 | 1 DUO-COTECXIN                   |
| 88 NA                   | 2 | 1 DUO-COTECXIN                   |
| 88 NA                   | 2 | 1 DUO-COTECXIN                   |
| 88 NA                   | 2 | 1 DUO-COTECXIN                   |
| 88 NA                   | 2 | 1 DUO-COTECXIN                   |
| 88 NA                   | 2 | 1 DUO-COTECXIN                   |
| Ye WEAKNESS             | 2 | 1 DIHYDROARTEMISININ PIPERAQUINE |
| 88 NA                   | 2 | 1 DUO-COTECXIN                   |
| 88 NA                   | 2 | 1 DUO-COTECXIN                   |
| 88 NA                   | 2 | 1 DUO-COTECXIN                   |
| 88 NA                   | 2 | 1 DUO-COTECXIN                   |
| 88 NA                   | 2 | 1 DUO-COTECXIN                   |
| 88 NA                   | 2 | 1 DUO-COTECXIN                   |
| 88 NA                   | 2 | 1 DUO-COTECXIN                   |
| 88 NA                   | 2 | 1 DUO-COTECXIN                   |
| Ye WEAKNESS             | 2 | 1 DUO-COTECXIN                   |
| 88 NA                   | 2 | 1 DUO-COTECXIN                   |
| 88 NA                   | 2 | 1 DUO-COTECXIN                   |
| No                      | 2 | 1 DUO-COTECXIN                   |
| 88 NA                   | 2 | 1 DUO-COTECXIN                   |
| 88 NA                   | 2 | 1 DUO-COTECXIN                   |
| 88 NA                   | 2 | 1 DUO-COTECXIN                   |
| 88 NA                   | 2 | 1 DUO-COTECXIN                   |
| 88 NA                   | 2 | 1 DUO-COTECXIN                   |
| 88 NA                   | 2 | 1 DUO-COTECXIN                   |
| Ye WEAKNESS, BODY PAINS |   | 1 DUO-COTECXIN                   |
| 88 NA                   | 2 | 1 DUO-COTECXIN                   |
| 88 NA                   | 2 | 1 DUO-COTECXIN                   |
| 88 NA                   | 2 | 1 DUO-COTECXIN                   |
| No                      | 2 | 1 DUO-COTECXIN                   |
| 88 NA                   | 2 | 8 NA                             |
| 88 NA                   | 2 | 1 DUO-COTECXIN                   |
| 88 NA                   | 2 | 1 DUO-COTECXIN                   |
| 88 NA                   | 2 | 1 DUO-COTECXIN                   |



|                     |   |                |
|---------------------|---|----------------|
| 88 NA               | 2 | 1 DUO-COTECXIN |
| 88 NA               | 2 | 1 DUO-COTECXIN |
| 88 NA               | 2 | 1 DUO-COTECXIN |
| No                  | 2 | 1 DUO-COTECXIN |
| 88 NA               | 2 | 8 NA           |
| Ye WEAKNESS         | 2 | 1 DUO-COTECXIN |
| 88 NA               | 2 | 1 DUO-COTECXIN |
| 88 NA               | 2 | 1 DUO-COTECXIN |
| 88 NA               | 2 | 1 DUO-COTECXIN |
| 88 NA               | 2 | 1 DUO-COTECXIN |
| 88 NA               | 2 | 1 DUO-COTECXIN |
| 88 NA               | 2 | 8 NA           |
| 88 NA               | 2 | 8 NA           |
| 88 NA               | 2 | 1 DUO-COTECXIN |
| 88 NA               | 2 | 1 DUO-COTECXIN |
| 88 NA               | 2 | 1 DUO-COTECXIN |
| 88 NA               | 2 | 1 DUO-COTECXIN |
| 88 NA               | 2 | 1 DUO-COTECXIN |
| 88 NA               | 2 | 1 DUO-COTECXIN |
| 88 NA               | 2 | 1 DUO-COTECXIN |
| Ye LOSS OF APPETITE | 2 | 8 NA           |
| 88 NA               | 2 | 8 NA           |
| 88 NA               | 2 | 8 NA           |
| 88 NA               | 2 | 1 DUO-COTECXIN |
| 88 NA               | 2 | 1 DUO-COTECXIN |
| 88 NA               | 2 | 1 DUO-COTECXIN |
| 88 NA               | 2 | 1 DUO-COTECXIN |
| Ye WEAKNESS         | 2 | 1 DUO-COTECXIN |
| 88 NA               | 2 | 1 DUO-COTECXIN |
| 88 NA               | 2 | 8 NA           |
| 88 NA               | 2 | 8 NA           |
| 88 NA               | 2 | 1 DUO-COTECXIN |
| 88 NA               | 2 | 1 DUO-COTECXIN |
| 88 NA               | 2 | 1 DUO-COTECXIN |
| No                  | 2 | 1 DUO-COTECXIN |
| 88 NA               | 2 | 1 DUO-COTECXIN |
| 88 NA               | 2 | 1 DUO-COTECXIN |
| 88 NA               | 2 | 1 DUO-COTECXIN |
| 88 NA               | 2 | 1 DUO-COTECXIN |
| 88 NA               | 2 | 1 DUO-COTECXIN |
| 88 NA               | 2 | 1 DUO-COTECXIN |
| 88 NA               | 2 | 1 DUO-COTECXIN |
| 88 NA               | 2 | 8 NA           |
| 88 NA               | 2 | 8 NA           |
| 88 NA               | 2 | 8 NA           |

|             |   |                                  |
|-------------|---|----------------------------------|
| 88 NA       | 2 | 1 DUO-COTECXIN                   |
| Ye FEVER    | 2 | 1 DUO-COTECXIN                   |
| 88 NA       | 2 | 1 DUO-COTECXIN                   |
| No WEAKNESS | 2 | 1 DUO-COTECXIN                   |
| 88 NA       | 2 | 1 DUO-COTECXIN                   |
| Ye WEAKNESS | 2 | 1 DUO-COTECXIN                   |
| No WEAKNESS | 2 | 1 DIHYDROARTEMISININ PIPERAQUINE |
| 88 NA       | 2 | 1 DUO-COTECXIN                   |
| 88 NA       | 2 | 1 DUO-COTECXIN                   |
| 88 NA       | 2 | 1 DUO-COTECXIN                   |
| 88 NA       | 2 | 8 NA                             |
| 88 NA       | 2 | 8 NA                             |
| 88 NA       | 2 | 1 DUO-COTECXIN                   |
| 88 NA       | 2 | 1 DUO-COTECXIN                   |
| Ye WEAKNESS | 2 | 1 DUO-COTECXIN                   |
| 88 NA       | 2 | 1 DUO-COTECXIN                   |
| 88 NA       | 2 | 1 DUO-COTECXIN                   |
| No          | 2 | 1 DUO-COTECXIN                   |
| 88 NA       | 2 | 1 DUO-COTECXIN                   |
| 88 NA       | 2 | 1 DUO-COTECXIN                   |
| 88 NA       | 2 | 1 DUO-COTECXIN                   |
| 88 NA       | 2 | 1 DUO-COTECXIN                   |
| 88 NA       | 2 | 1 DUO-COTECXIN                   |
| 88 NA       | 2 | 8 NA                             |
| 88 NA       | 2 | 1 DUO-COTECXIN                   |
| 88 NA       | 2 | 1 DUO-COTECXIN                   |
| 88 NA       | 2 | 8 NA                             |
| 88 NA       | 2 | 1 DUO-COTECXIN                   |
| 88 NA       | 2 | 1 DUO-COTECXIN                   |
| 88 NA       | 2 | 1 DUO-COTECXIN                   |
| 88 NA       | 2 | 1 DUO-COTECXIN                   |
| 88 NA       | 2 | 1 DUO-COTECXIN                   |
| 88 NA       | 2 | 1 DUO-COTECXIN                   |
| 88 NA       | 2 | 1 DUO-COTECXIN                   |
| 88 NA       | 2 | 1 DUO-COTECXIN                   |
| 88 NA       | 2 | 1 DUO-COTECXIN                   |
| 88 NA       | 2 | 1 DUO-COTECXIN                   |
| 88 NA       | 2 | 1 DUO-COTECXIN                   |
| 88 NA       | 2 | 1 DUO-COTECXIN                   |
| 88 NA       | 2 | 1 DUO-COTECXIN                   |
| 88 NA       | 2 | 1 DUO-COTECXIN                   |
| 88 NA       | 2 | 1 DUO-COTECXIN                   |
| 88 NA       | 2 | 1 DUO-COTECXIN                   |
| No          | 2 | 1 DUO-COTECXIN                   |
| 88 NA       | 2 | 1 DUO-COTECXIN                   |
| 88 NA       | 2 | 1 DUO-COTECXIN                   |
| 88 NA       | 2 | 1 DUO-COTECXIN                   |

|             |   |                |
|-------------|---|----------------|
| 88 NA       | 2 | 1 DUO-COTECXIN |
| 88 NA       | 2 | 1 DUO-COTECXIN |
| 88 NA       | 2 | 1 DUO-COTECXIN |
| 88 NA       | 2 | 1 DUO-COTECXIN |
| 88 NA       | 2 | 8 NA           |
| 88 NA       | 2 | 1 DUO-COTECXIN |
| 88 NA       | 2 | 1 DUO-COTECXIN |
| 88 NA       | 2 | 8 NA           |
| 88 NA       | 2 | 1 DUO-COTECXIN |
| 88 NA       | 2 | 1 DUO-COTECXIN |
| 88 NA       | 2 | 1 DUO-COTECXIN |
| 88 NA       | 2 | 8 NA           |
| 88 NA       | 2 | 1 DUO-COTECXIN |
| 88 NA       | 2 | 8 NA           |
| 88 NA       | 2 | 8 NA           |
| 88 NA       | 2 | 1 DUO-COTECXIN |
| 88 NA       | 2 | 8 NA           |
| 88 NA       | 2 | 1 DUO-COTECXIN |
| 88 NA       | 2 | 1 DUO-COTECXIN |
| No          | 2 | 1 DUO-COTECXIN |
| 88          | 2 | 8 NA           |
| No          | 2 | 1 DUO-COTECXIN |
| 88 NA       | 2 | 1 DUO-COTECXIN |
| 88 NA       | 2 | 1 DUO-COTECXIN |
| 88 NA       | 2 | 1 DUO-COTECXIN |
| No          | 2 | 1 DUO-COTECXIN |
| 88 NA       | 2 | 8 NA           |
| 88 NA       | 2 | 1 DUO-COTECXIN |
| 88 NA       | 2 | 1 DUO-COTECXIN |
| 88 NA       | 2 | 8 NA           |
| 88 NA       | 2 | 8 NA           |
| 88 NA       | 2 | 1 DUO-COTECXIN |
| 88 NA       | 2 | 1 DUO-COTECXIN |
| 88 NA       | 2 | 1 DUO-COTECXIN |
| 88 NA       | 2 | 1 DUO-COTECXIN |
| 88 NA       | 2 | 1 DUO-COTECXIN |
| 88 NA       | 2 | 1 DUO-COTECXIN |
| 88 NA       | 2 | 1 DUO-COTECXIN |
| 88 NA       | 2 | 1 DUO-COTECXIN |
| 88 NA       | 2 | 1 DUO-COTECXIN |
| 88 NA       | 2 | 1 DUO-COTECXIN |
| 88 NA       | 2 | 1 DUO-COTECXIN |
| 88 NA       | 2 | 1 DUO-COTECXIN |
| 88 NA       | 2 | 1 DUO-COTECXIN |
| Ye WEAKNESS | 2 | 1 DUO-COTECXIN |
| 88 NA       | 2 | 1 DUO-COTECXIN |
| 88 NA       | 2 | 1 DUO-COTECXIN |
| 88 NA       | 2 | 1 DUO-COTECXIN |

|       |   |                |
|-------|---|----------------|
| 88 NA | 2 | 1 DUO-COTECXIN |
| 88 NA | 2 | 1 DUO-COTECXIN |
| 88 NA | 2 | 1 DUO-COTECXIN |
| 88 NA | 2 | 1 DUO-COTECXIN |
| 88 NA | 2 | 1 DUO-COTECXIN |
| 88 NA | 2 | 1 DUO-COTECXIN |
| 88 NA | 2 | 1 DUO-COTECXIN |
| 88 NA | 2 | 1 DUO-COTECXIN |
| 88 NA | 2 | 1 DUO-COTECXIN |
| 88 NA | 2 | 1 DUO-COTECXIN |
| 88 NA | 2 | 1 DUO-COTECXIN |
| 88 NA | 2 | 8 NA           |
| 88 NA | 2 | 1 DUO-COTECXIN |
| 88 NA | 2 | 1 DUO-COTECXIN |
| 88 NA | 2 | 1 DUO-COTECXIN |
| 88 NA | 2 | 8 NA           |
| 88 NA | 2 | 1 DUO-COTECXIN |
| No    | 2 | 1 DUO-COTECXIN |

| q83ant1b                         | q83ant2 | q83ant2a | q83ant2b | q84 | q85 | q86 | q86a | q87 | q88 | q88a |
|----------------------------------|---------|----------|----------|-----|-----|-----|------|-----|-----|------|
| DIHYDROARTEMISININ PIPERAQUINE   | 8       | NA       | NA       | 0   | 88  |     |      | Y   | N   | NA   |
| DIHYDROARTEMISININ PIPERAQUINE   | 8       | NA       | NA       | 0   | 88  |     |      | Y   | N   | NA   |
| DIHYDROARTEMISIN PIPERAQUINE     | 8       | NA       | NA       | 0   | 88  |     |      | N   |     | NA   |
| DIHYDROARTEMISININ PIPERAQUINE   | 8       | NA       | NA       | 0   | 88  |     |      | Y   | N   | NA   |
| DIHYDROARTEMISININ PIPERAQUINE   | 8       | NA       | NA       | 0   |     |     |      | Y   | N   | NA   |
| DIHDROARTEMISININ PIPERAQUINE    | 8       | NA       | NA       | 0   |     |     |      | Y   | N   | NA   |
| DIHDROARTEMISININ PIPERAQUINE    | 8       | NA       | NA       | 1   |     | C   | NA   | Y   | N   | NA   |
|                                  | 8       | NA       | NA       | 0   |     |     |      | Y   | N   | NA   |
| DIHYDROARTEMISININ PIPERAQUINE   | 8       |          |          | 0   |     |     |      | Y   | N   | NA   |
| DIHYDROARTEMISININ PIPERAQUINE   | 8       | NA       | NA       | 0   |     |     |      | Y   | P   | NA   |
| DIHYDROARTEMISININ/PIPERAQUINE   | 8       |          |          | 0   |     |     |      | Y   | N   | NA   |
|                                  | 8       | NA       | NA       | 0   | 88  |     |      | Y   | N   | NA   |
| DIHYDRARTEMISININ-PIPERAQUINE    | 8       | NA       | NA       | 0   | 88  |     |      | Y   | N   | NA   |
| DIHYDRARTEMISININ PIPERAQUINE    | 8       | NA       | NA       | 1   |     | C   | NA   | Y   | N   | NA   |
| DIHYDRARTEMISININ PIPERAQUINE    | 8       |          |          | 0   | 88  |     |      | Y   | N   | NA   |
| DIHYDROARTEMISININ PIPERAQUINE   | 8       | NA       | NA       | 0   |     |     |      | Y   | P   | NA   |
|                                  | 8       | NA       | NA       | 0   |     |     |      | Y   | N   | NA   |
| DIHYDROARTEMISININM PIPERAQUINE  | 8       | NA       | NA       | 0   |     |     |      | Y   | P   | NA   |
| DIHYDROARTEMISININ/PIPERAQUINE   | 8       | NA       | NA       | 0   | 88  |     |      | Y   | P   | NA   |
| DIHYDROARTEMISININ-PIPERAQUINE   | 8       | NA       | NA       | 0   | 88  |     |      | Y   | N   | NA   |
| DIHYDROARTEMISININ PIPERAQUINE   | 8       | NA       | NA       | 0   | 88  |     |      | Y   | P   | NA   |
| (DIHYDROARTEMISININ PIPERAQUINE) | 8       | NA       | NA       | 2   | 88  | C   | NA   | N   |     | NA   |
| DIHYDROARTEMISININ PIPERAQUINE   | 8       | NA       | NA       | 0   | 88  |     |      | Y   | P   | NA   |
| DIHYDROARTEMISININ/PIPERAQUINE   | 8       | NA       | NA       | 0   |     |     |      | Y   | P   | NA   |
|                                  | 8       | NA       | NA       | 0   | 88  |     |      | Y   | N   | NA   |
|                                  | 8       | NA       | NA       | 0   | 88  |     |      | Y   | N   | NA   |
| DIHYDROARTEMISININ PIPERAQUINE   | 8       | NA       | NA       | 88  | 88  |     |      | Y   | P   | NA   |
|                                  | 8       | NA       | NA       | 4   |     | C   | NA   | Y   | N   | NA   |
|                                  | 8       | NA       | NA       | 6   | 88  | C   | NA   | Y   | P   | NA   |
| DIHYDROARTEMISININ PIPERAQUINE   | 8       | NA       | NA       | 0   |     |     |      | Y   | P   | NA   |
| DIHYDROARTEMISININ PIPERAQUINE   | 8       | NA       | NA       | 0   |     |     |      | Y   | P   | NA   |
| (DIHYDROATEMISININ PIPERAQUINE)  | 8       | NA       | NA       | 0   |     |     |      | Y   | P   | NA   |
| (DIHYDROARTEMISININ PIPERAQUINE) | 8       | NA       | NA       | 0   | 88  |     |      | Y   | P   | NA   |
| (DIHYDROARTEMISININ PIPERAQUINE) | 8       | NA       | NA       | 0   |     |     |      | Y   | P   | NA   |
| (DIHYDROATEMISININ PIPERAQUINE)  | 8       | NA       | NA       | 0   |     |     |      | Y   | P   | NA   |
| (DIHYDROARTEMISININ PIPERAQUINE) | 8       | NA       | NA       | 0   |     |     |      | Y   | P   | NA   |
| (DIHYDROABTEMISININ PIPERAQUINE) | 8       | NA       | NA       | 6   |     | C   | NA   | Y   | P   | NA   |
| (DIHYDROARTEMISININ PIPERAQUINE) | 8       | NA       | NA       | 2   |     | C   | NA   | Y   | P   | NA   |
| (DIHYDROABTEMISININ PIPERAQUINE) | 8       | NA       | NA       | 0   |     |     |      | Y   | P   | NA   |
| (DIHYDROARTEMISININ PIPERAQUIN   | 8       | NA       | NA       | 0   | 88  |     |      | Y   | P   | NA   |
| DIHYDROARTEMISININ PIPERAQUINE   | 8       | NA       | NA       | 0   |     |     |      | Y   | N   | NA   |
| DIHYDROARTEMISININ PIPERAQUINE   | 8       | NA       | NA       | 0   |     |     |      | Y   | P   | NA   |
|                                  | 8       | NA       | NA       | 2   | 88  | C   | NA   | Y   | P   | NA   |
| NA                               | 8       | NA       | NA       | 88  | 88  |     |      | Y   | G   | NA   |
| NA                               | 8       | NA       | NA       | 88  | 88  |     |      | Y   | G   | NA   |
| DIHYDROARTEMISININ PIPERAQUINE   | 8       | NA       | NA       | 0   | 88  |     |      | Y   | P   | NA   |

[illegible]

[illegible]

[illegible]



[illegible]

[illegible]

|                                |   |    |    |    |    |   |    |   |    |    |
|--------------------------------|---|----|----|----|----|---|----|---|----|----|
| DIHYDROARTEMISININ PIPERAQUINE | 8 | NA | NA | 0  | 88 |   | Y  | P | NA |    |
| DIHYDROARTEMISININ PIPERAQUINE | 8 | NA | NA | 0  | 88 |   | Y  | P | NA |    |
| DIHYDROARTEMISININ PIPERAQUINE | 8 | NA | NA | 0  | 88 |   | Y  | P | NA |    |
| DIHYDROARTEMISININ PIPERAQUINE | 8 | NA | NA | 0  | 88 |   | Y  | N | NA |    |
| DIHYDROARTEMISININ PIPERAQUINE | 8 | NA | NA | 0  | 88 |   | Y  | N | NA |    |
| DIHYDROARTEMISININ PIPERAQUINE | 8 | NA | NA | 2  | 88 | C | NA | Y | f  | NA |
| DIHYDROARTEMISININ PIPERAQUINE | 8 | NA | NA | 0  | 88 |   | Y  | N | NA |    |
| DIHYDROARTEMISININ PIPERAQUINE | 8 | NA | NA | 0  | 88 |   | Y  | N | NA |    |
| DIHYDROARTEMISININ PIPERAQUINE | 8 | NA | NA | 0  | 88 |   | Y  | N | NA |    |
| DIHYDROARTEMISININ PIPERAQUINE | 8 | NA | NA | 0  | 88 |   | Y  | N | NA |    |
| DIHYDROARTEMISININ PIPERAQUINE | 8 | NA | NA | 1  | 88 | C | NA | Y | G  | NA |
| NA                             | 8 | NA | NA | 88 | 88 |   | Y  | N | NA |    |
| DIHYDROARTEMISININ PIPERAQUINE | 8 | NA | NA | 2  | 88 | C | NA | Y | P  | NA |
| DIHYDROARTEMISININ PIPERAQUINE | 8 | NA | NA | 0  | 88 |   | Y  | N | NA |    |
| DIHYDROARTEMISININ PIPERAQUINE | 8 | NA | NA | 0  | 88 |   | Y  | N | NA |    |
| NA                             | 8 | NA | NA | 88 | 88 |   | Y  | N | NA |    |
| DIHYDROARTEMISININ PIPERAQUINE | 8 | NA | NA | 0  | 88 |   | Y  | P | NA |    |
| DIHYDROARTEMISININ PIPERAQUINE | 8 | NA | NA | 0  | 88 |   | Y  | P | NA |    |

| q89 | q89a                                 | inttime | inttime1 | sdate     | rdt | asexpf | sexpf |
|-----|--------------------------------------|---------|----------|-----------|-----|--------|-------|
| s   | NA                                   | 7       | 50       | 20-Oct-14 | P   | P      | N     |
|     | NA                                   | 9       | 20       | 20-Oct-14 | P   | N      | N     |
|     | NA                                   | 7       | 11       | 20-Oct-14 | P   | P      | N     |
|     | NA                                   | 8       | 30       | 20-Oct-14 | P   | N      | N     |
|     | NA                                   | 10      | 23       | 20-Oct-14 | P   | N      | N     |
|     | NA                                   | 8       | 15       | 21-Oct-14 | P   | N      | N     |
|     | NA                                   | 8       | 38       | 21-Oct-14 | P   | N      | N     |
|     | NA                                   | 10      | 10       | 21-Oct-14 | P   | N      | N     |
|     | NA                                   | 7       | 50       | 21-Oct-14 | P   | N      | N     |
|     | NA                                   | 7       | 9        | 21-Oct-14 | P   | N      | N     |
|     | NA                                   | 7       | 53       | 28-Oct-14 | P   | N      | N     |
|     | NA                                   | 9       | 25       | 28-Oct-14 | P   | P      | N     |
|     | NA                                   | 8       | 44       | 28-Oct-14 | P   | P      | N     |
|     | NA                                   | 8       | 25       | 3-Nov-14  | P   | P      | N     |
|     | NA                                   | 7       | 5        | 3-Nov-14  | P   | P      | N     |
|     | NA                                   | 8       | 2        | 3-Nov-14  | P   | N      | N     |
|     | NA                                   | 8       | 55       | 3-Nov-14  | P   | N      | N     |
|     | NA                                   | 7       | 38       | 4-Nov-14  | P   | P      | N     |
|     | NA                                   | 7       | 55       | 4-Nov-14  | P   | N      | N     |
|     | NA                                   | 8       | 10       | 4-Nov-14  | P   | P      | N     |
| I   | IS GOOD BUT NEED TO TRY ANOTHER DRUG | 8       | 26       | 4-Nov-14  | P   | P      | N     |
|     | NA                                   | 6       | 52       | 4-Nov-14  | P   | P      | N     |
|     | NA                                   | 8       | 57       | 4-Nov-14  | P   | N      | N     |
|     | NA                                   | 9       | 15       | 4-Nov-14  | P   | P      | N     |
|     | NA                                   | 8       | 2        | 10-Nov-14 | P   | P      | N     |
|     | NA                                   | 8       | 15       | 10-Nov-14 | P   | P      | N     |
|     | NA                                   | 8       | 50       | 10-Nov-14 | P   | P      | N     |
|     | NA                                   | 7       | 22       | 10-Nov-14 | P   | P      | N     |
| B   | NA                                   | 6       | 59       | 10-Nov-14 | P   | P      | N     |
|     | NA                                   | 9       | 14       | 11-Dec-14 | P   | N      | N     |
|     | NA                                   | 8       | 30       | 11-Nov-14 | P   | P      | N     |
|     | NA                                   | 7       | 23       | 11-Nov-14 | P   | P      | N     |
|     | NA                                   | 8       | 37       | 11-Nov-14 | P   | P      | N     |
|     | NA                                   | 7       | 26       | 17-Nov-14 | P   | P      | N     |
|     | NA                                   | 8       | 5        | 17-Nov-14 | P   | N      | N     |
|     | NA                                   | 9       | 31       | 17-Nov-14 | P   | N      | N     |
|     | NA                                   | 8       | 40       | 17-Nov-14 | P   | N      | N     |
|     | NA                                   | 7       | 55       | 24-Nov-14 | P   | N      | N     |
| I   | NA                                   | 7       | 30       | 24-Nov-14 | P   | N      | N     |
|     | NA                                   | 7       | 16       | 28-Nov-14 | P   | P      | N     |
|     | NA                                   | 7       | 41       | 2-Dec-14  | P   | N      | N     |
|     | NA                                   | 8       | 21       | 8-Dec-14  | P   | P      | N     |
|     | NA                                   | 9       | 40       | 9-Dec-14  | P   | N      | N     |
|     | NA                                   | 7       | 25       | 15-Dec-14 | P   | P      | N     |
|     | NA                                   | 11      | 40       | 16-Dec-14 | P   | P      | N     |
|     | NA                                   | 8       | 48       | 17-Dec-14 | P   | P      | N     |

|   |    |    |    |           |   |   |   |
|---|----|----|----|-----------|---|---|---|
| t | NA | 6  | 44 | 18-Dec-14 | P | N | N |
|   | NA | 7  | 15 | 18-Dec-14 | P | N | N |
|   | NA | 7  | 46 | 22-Dec-14 | P | P | N |
|   | NA | 8  | 15 | 22-Dec-14 | P | N | P |
|   | NA | 7  | 10 | 22-Dec-14 | P | N | N |
|   | NA | 9  | 10 | 22-Dec-14 | P | N | N |
|   | NA | 8  | 2  | 22-Dec-14 | P | P | N |
|   | NA | 8  | 15 | 22-Dec-14 | P | P | N |
|   | NA | 10 | 12 | 23-Dec-14 | P | P | N |
|   | NA | 7  | 57 | 23-Dec-14 | P | N | N |
|   | NA | 8  | 17 | 23-Dec-14 | P | N | N |
|   | NA | 8  | 8  | 29-Dec-14 |   | P | N |
|   | NA | 8  | 54 | 29-Dec-14 | P | N | N |
|   | NA | 9  | 0  | 30-Dec-14 | P | N | N |
|   | NA | 9  | 25 | 30-Dec-14 | P | N | N |
|   | NA | 9  | 30 | 30-Dec-14 | P | N | N |
|   | NA | 9  | 47 | 5-Jan-15  | P | N | N |
|   | NA | 9  | 16 | 5-Jan-15  | P | N | N |
|   | NA | 8  | 21 | 5-Jan-15  | P | N | N |
|   | NA | 8  | 25 | 6-Jan-15  | P | P | N |
| l | NA |    |    | 6-Jan-15  | P | N | N |
|   | NA | 8  | 55 | 6-Jan-15  | P | P | N |
|   | NA | 9  | 21 | 12-Jan-15 | P | P | N |
|   | NA | 9  | 10 | 12-Jan-15 | P | P | N |
|   | NA | 9  | 25 | 12-Jan-15 | P | P | N |
|   | NA |    |    | 20-Jan-15 | P | N | N |
|   | NA | 8  | 35 | 26-Jan-15 | P | P | N |
|   | NA | 7  | 5  | 26-Jan-15 | P | P | N |
|   | NA | 7  | 28 | 26-Jan-15 | P | P | N |
|   | NA | 10 | 56 | 2-Feb-15  | P |   |   |
|   | NA | 8  | 45 | 2-Feb-15  | P |   |   |
|   | NA | 7  | 24 | 20-Jan-15 | P | P | N |
|   | NA | 11 | 13 | 16-Dec-14 | P | P | N |
|   | NA | 6  | 42 | 14-Sep-15 | P | P | N |
|   | NA | 6  | 21 | 14-Sep-15 | P | P | N |
|   | NA | 7  | 8  | 14-Sep-15 | P | P | N |
|   | NA | 8  | 41 | 14-Sep-15 | P | N | N |
|   | NA | 7  | 50 | 8-Sep-15  | P | P | N |
|   | NA | 6  | 45 | 8-Sep-15  | P | P | N |
|   | NA | 8  | 15 | 8-Sep-15  | P | P | N |
|   | NA | 7  | 30 | 8-Sep-15  | P | P | P |
|   | NA | 7  | 11 | 8-Sep-15  | P | P | N |
|   | NA | 8  | 50 | 8-Sep-15  | P | N | N |
|   | NA | 9  | 0  | 8-Sep-15  | P | N | N |
|   | NA | 6  | 50 | 8-Sep-15  | P | P | N |
|   | NA | 7  | 41 | 8-Sep-15  | P | N | N |
|   | NA | 7  | 29 | 8-Sep-15  | P | N | N |

|      |    |    |           |   |   |   |
|------|----|----|-----------|---|---|---|
| NA   | 8  | 1  | 7-Sep-15  | P | P | N |
| NA   | 7  | 42 | 7-Sep-15  | P | P | N |
| NA   | 9  | 27 | 7-Sep-15  | P | N | N |
| NA   | 10 | 38 | 7-Sep-15  | P | N | N |
| NA   | 9  | 35 | 3-Nov-15  | P | P | N |
| NA   | 7  | 15 | 3-Nov-15  | P | N | N |
| NA   | 7  | 58 | 3-Nov-15  | P | N | N |
| NA   | 8  | 16 | 3-Nov-15  | P | P | N |
| NA   | 6  | 45 | 3-Nov-15  | P | P | N |
| NA   | 7  | 40 | 3-Nov-15  | P | P | N |
| NA   | 7  | 27 | 3-Nov-15  | P | P | N |
| NA   | 6  | 15 | 3-Nov-15  | P | P | N |
| NA   | 10 | 17 | 3-Nov-15  | P | P | N |
| NA   | 9  | 7  | 3-Nov-15  | P | P | N |
| NA   | 8  | 34 | 3-Nov-15  | P | N | N |
| NA   | 7  | 30 | 3-Nov-15  | P | P | N |
| NA   | 6  | 42 | 3-Nov-15  | P | P | N |
| NA   | 11 | 17 | 2-Nov-15  | P | P | N |
| NA   | 8  | 53 | 2-Nov-15  | P | P | N |
| NA   | 9  | 35 | 2-Nov-15  | P | P | N |
| NA   | 7  | 53 | 2-Nov-15  | P | P | N |
| NA   | 6  | 45 | 2-Nov-15  | P | P | N |
| NA   | 7  | 30 | 2-Nov-15  | P | P | N |
| NA   | 8  | 17 | 2-Nov-15  | P | P | N |
| NA   | 8  | 43 | 2-Nov-15  | P | P | N |
| NA   | 7  | 16 | 2-Nov-15  | P | P | N |
| NA   | 6  | 33 | 2-Nov-15  | P | P | N |
| NA   | 7  | 25 | 2-Nov-15  | P | P | N |
| NA   | 7  | 3  | 2-Nov-15  | P | P | N |
| NA   | 8  | 42 | 27-Oct-15 | P | P | N |
| NA   | 8  | 7  | 27-Oct-15 | P | P | N |
| NA   | 8  | 53 | 7-Sep-15  | P | P | N |
| NA   | 7  | 18 | 7-Sep-15  | P | P | N |
| NA   | 8  | 35 | 7-Sep-15  | P | N | N |
| NA   | 6  | 55 | 7-Sep-15  | P | P | N |
| NA   | 7  | 55 | 7-Sep-15  | P | P | N |
| NA   | 8  | 15 | 7-Sep-15  | P | P | N |
| NA   | 7  | 21 | 7-Sep-15  | P | P | N |
| I NA | 6  | 41 | 1-Sep-15  | P | P | N |
| NA   | 8  | 43 | 1-Sep-15  | P | P | N |
| NA   | 7  | 8  | 1-Sep-15  | P | P | N |
| NA   | 9  | 39 | 1-Sep-15  | P | P | N |
| NA   | 7  | 36 | 1-Sep-15  | P | P | N |
| NA   | 7  | 0  | 1-Sep-15  | P | P | N |
| NA   | 8  | 13 | 1-Sep-15  | P | P | N |
| NA   | 6  | 39 | 1-Sep-15  | P | P | N |
| NA   | 8  | 12 | 31-Aug-13 | P | P | N |

|   |                                      |    |    |           |   |   |   |
|---|--------------------------------------|----|----|-----------|---|---|---|
|   | NA                                   | 7  | 44 | 31-Aug-15 | P | P | N |
|   | NA                                   | 7  | 12 | 31-Aug-15 | P | P | N |
|   | NA                                   | 6  | 39 | 31-Aug-15 | P | N | N |
|   | NA                                   | 8  | 30 | 31-Aug-15 | P | P | N |
|   | NA                                   | 7  | 54 | 1-Sep-15  | P | N | N |
|   | NA                                   | 7  | 16 | 20-Oct-15 | P | P | N |
|   | NA                                   | 8  | 24 | 19-Oct-15 | P | P | N |
|   | NA                                   | 7  | 16 | 19-Oct-15 | P | P | N |
|   | NA                                   | 9  | 5  | 19-Oct-15 | P | P | P |
|   | NA                                   | 8  | 23 | 19-Oct-15 | P | P | N |
|   | NA                                   | 8  | 42 | 19-Oct-15 | P | N | N |
|   | NA                                   | 6  | 52 | 19-Oct-15 | P | P | N |
|   | NA                                   | 6  | 37 | 19-Oct-15 | P | P | N |
|   | NA                                   | 7  | 50 | 19-Oct-15 | P | P | N |
|   | NA                                   | 2  | 39 | 19-Oct-15 | P | P | N |
|   | NA                                   | 7  | 17 | 19-Oct-15 | P | P | N |
|   | NA                                   | 6  | 47 | 19-Oct-15 | P | P | N |
|   | NA                                   | 10 | 19 | 13-Oct-15 | P | P | N |
|   | NA                                   |    |    | 13-Oct-15 | P | P | N |
|   | NA                                   | 1  | 20 | 13-Oct-15 | P | P | N |
|   | NA                                   | 1  | 38 | 13-Oct-15 | P | P | N |
| I | NA                                   | 7  | 15 | 13-Oct-15 | P | P | N |
|   | NA                                   | 7  | 36 | 13-Oct-15 | P | P | N |
|   | NA                                   | 8  | 15 | 13-Oct-15 | P | P | N |
|   | NA                                   | 6  | 55 | 13-Oct-15 | P | P | N |
|   | NA                                   | 8  | 40 | 13-Oct-15 | P | N | N |
|   | NA                                   | 7  | 53 | 12-Oct-15 | P | P | N |
|   | NA                                   | 6  | 56 | 12-Oct-15 | P | P | N |
|   | NA                                   | 7  | 20 | 12-Oct-15 | P | N | N |
|   | NA                                   | 8  | 22 | 12-Oct-15 | P | P | N |
|   | NA                                   | 7  | 20 | 12-Oct-15 | P | P | P |
|   | NA                                   | 7  | 38 | 12-Oct-15 | P | P | N |
|   | NA                                   | 7  | 44 | 12-Oct-15 | P | P | N |
|   | NA                                   | 7  | 3  | 12-Oct-15 | P | P | N |
|   | NA                                   | 6  | 39 | 12-Oct-15 | P | P | N |
|   | NA                                   | 6  | 34 | 28-Sep-15 | P | P | N |
|   | NA                                   | 7  | 43 | 22-Sep-15 | P | N | N |
|   | NA                                   | 6  | 48 | 22-Sep-15 | P | P | N |
|   | NA                                   | 6  | 28 | 22-Sep-15 | P | N | N |
|   | NA                                   | 6  | 49 | 22-Sep-15 | P | P | N |
|   | NA                                   | 7  | 15 | 22-Sep-15 | P | P | N |
|   | NA                                   | 8  | 27 | 22-Sep-15 | P | P | N |
|   | NA                                   | 8  | 25 | 22-Sep-15 | P | P | N |
| s | BECAUSE CHILD DONT WANT TO TAKE TABS | 7  | 45 | 22-Sep-15 | P | P | N |
|   | NA                                   | 7  | 20 | 22-Sep-15 | P | P | N |
|   | NA                                   | 8  | 57 | 15-Sep-15 | P | N | N |
|   | NA                                   | 7  | 53 | 15-Sep-15 | P | P | N |

|   |    |    |    |           |   |   |   |
|---|----|----|----|-----------|---|---|---|
| s | NA | 7  | 41 | 15-Sep-15 | P | N | N |
|   | NA | 8  | 42 | 15-Sep-15 | P | P | N |
|   | NA | 8  | 21 | 15-Sep-15 | P | P | N |
|   | NA | 10 | 13 | 15-Sep-15 | P | N | N |
|   | NA | 8  | 43 | 15-Sep-15 | P | P | N |
|   | NA | 7  | 15 | 15-Sep-15 | P | N | N |
|   | NA | 9  | 40 | 15-Sep-15 | P | N | N |
|   | NA | 9  | 26 | 15-Sep-15 | P | P | P |
|   | NA | 7  | 51 | 15-Sep-15 | P | P | N |
|   | NA | 6  | 55 | 14-Sep-15 | P | P | N |
|   | NA | 11 | 50 | 14-Sep-15 | P | P | N |
|   | NA | 7  | 32 | 14-Sep-15 | P | P | N |
|   | NA | 7  | 19 | 14-Sep-15 | P | P | N |
|   | NA | 7  | 43 | 14-Sep-15 | P | P | N |
|   | NA | 6  | 32 | 22-Sep-15 | P | P | N |
|   | NA | 8  | 48 | 31-Aug-15 | P | P | N |
|   | NA | 8  | 39 | 31-Aug-15 | P | P | N |
|   | NA | 8  | 57 | 31-Aug-15 | P | P | N |
|   | NA | 8  | 5  | 31-Aug-15 | P | P | N |
|   | NA | 8  | 22 | 31-Aug-15 | P | P | N |
|   | NA | 8  | 45 | 25-Aug-15 | P | P | N |
|   | NA | 7  | 15 | 25-Aug-15 | P | P | N |
|   | NA | 9  | 13 | 25-Aug-15 | P | P | N |
|   | NA | 7  | 28 | 25-Aug-15 | P | N | N |
|   | NA | 8  | 25 | 25-Aug-15 | P | N | N |
|   | NA | 7  | 47 | 25-Aug-15 | P | P | N |
|   | NA | 7  | 6  | 25-Aug-15 | P | P | N |
|   | NA | 10 | 48 | 25-Aug-15 | P | P | N |
|   | NA | 7  | 53 | 25-Aug-15 | P | P | N |
|   | NA | 9  | 45 | 25-Aug-15 | P | P | N |
|   | NA | 8  | 28 | 24-Aug-15 | P | N | N |
|   | NA | 9  | 38 | 24-Aug-15 | P | N | P |
|   | NA | 8  | 55 | 24-Aug-15 | P | P | N |
|   | NA | 7  | 38 | 24-Aug-15 | P | P | N |
|   | NA | 9  | 10 | 24-Aug-15 | P | P | N |
|   | NA | 7  | 5  | 24-Aug-15 | P | P | N |
|   | NA | 8  | 33 | 24-Aug-15 | P | P | N |
|   | NA | 10 | 3  | 24-Aug-15 | P | N | N |
|   | NA | 8  | 7  | 24-Aug-15 | P | P |   |
|   | NA | 7  | 13 | 24-Aug-15 | P | P | N |
|   | NA | 8  | 46 | 24-Aug-15 | P | P | N |
|   | NA | 8  | 2  | 24-Aug-15 | P | N | N |
|   | NA | 7  | 32 | 24-Aug-15 | P | P | N |
|   | NA | 8  | 55 | 18-Aug-15 | P | P | N |
|   | NA | 9  | 25 | 18-Aug-15 | P | P | N |
|   | NA | 7  | 11 | 17-Aug-15 | P | P | N |
|   | NA | 8  | 36 | 17-Aug-15 | P | N | N |



|   |    |    |    |           |   |   |   |
|---|----|----|----|-----------|---|---|---|
|   | NA | 7  | 44 | 17-Aug-15 | P | P | N |
|   | NA | 8  | 6  | 17-Aug-15 | P | N | N |
|   | NA | 7  | 54 | 17-Aug-15 | P | P | N |
|   | NA | 7  | 8  | 17-Aug-15 | P | P | N |
|   | NA | 7  | 35 | 6-Oct-15  | P | N | N |
|   | NA | 8  | 38 | 6-Oct-15  | P | P | N |
| s | NA | 6  | 48 | 6-Oct-15  | P | P | N |
|   | NA | 7  | 50 | 6-Oct-15  | P | P | N |
|   | NA | 8  | 9  | 6-Oct-15  | P | P | N |
|   | NA | 12 | 45 | 5-Oct-15  | P | P | N |
|   | NA | 6  | 25 | 6-Oct-15  | P | P | N |
|   | NA | 7  | 4  | 5-Oct-15  | P | P | N |
|   | NA | 7  | 22 | 5-Oct-15  | P | P | N |
|   | NA | 8  | 4  | 5-Oct-15  | P | P | N |
|   | NA | 8  | 20 | 5-Oct-15  | P | N | N |
|   | NA | 8  | 53 | 5-Oct-15  | P | P | N |
|   | NA | 7  | 25 | 5-Oct-15  | P | P | N |
|   | NA | 8  | 0  | 29-Sep-15 | P | P | N |
|   | NA | 6  | 13 | 29-Sep-15 | P | N | N |
|   | NA | 7  | 5  | 29-Sep-15 | P | P | N |
|   | NA | 7  | 18 | 29-Sep-15 | P | P | N |
|   | NA | 7  | 37 | 29-Sep-15 | P | P | N |
|   | NA | 7  | 22 | 29-Sep-15 | P | P | N |
|   | NA | 8  | 0  | 29-Sep-15 | P | P | N |
|   | NA | 6  | 43 | 29-Sep-15 | P | N | N |
| s | NA | 6  | 52 | 29-Sep-15 | P | P | P |
|   | NA | 7  | 27 | 28-Sep-15 | P | P | N |
|   | NA | 7  | 9  | 28-Sep-15 | P | N | N |
|   | NA | 7  | 43 | 28-Sep-15 | P | N | N |
| I | NA | 8  | 25 | 28-Sep-15 | P | N | N |
|   | NA | 6  | 45 | 28-Sep-15 | P | P | N |
|   | NA | 8  | 14 | 28-Sep-15 | P | P | N |
|   | NA | 7  | 39 | 28-Sep-15 | P | P | N |
|   | NA | 6  | 59 | 28-Sep-15 | P | P | N |
|   | NA | 8  | 50 | 28-Sep-15 | P | P | N |
|   | NA | 6  | 42 | 27-Oct-15 | P | N | N |
|   | NA | 8  | 44 | 27-Oct-15 | P | P | N |
|   | NA | 6  | 36 | 27-Oct-15 | P | P | N |
|   | NA | 7  | 20 | 27-Oct-15 | P | P | N |
|   | NA | 9  | 5  | 27-Oct-15 | P | P | N |
|   | NA | 7  | 13 | 27-Oct-15 | P | P | N |
|   | NA | 6  | 26 | 27-Oct-15 | P | P | N |
|   | NA | 12 | 25 | 27-Oct-15 | P | P | N |
|   | NA | 7  | 21 | 27-Oct-15 | P | P | N |
|   | NA | 1  | 43 | 26-Oct-15 | P | P | N |
|   | NA | 8  | 10 | 26-Oct-15 | P | P | N |
|   | NA | 7  | 14 | 26-Oct-15 | P | N | N |

|    |    |    |           |   |   |   |
|----|----|----|-----------|---|---|---|
| NA | 7  | 36 | 26-Oct-15 | P | N | N |
| NA | 6  | 42 | 26-Oct-15 | P | P | N |
| NA | 9  | 5  | 26-Oct-15 | P | P | N |
| NA | 7  | 20 | 26-Oct-15 | P | P | N |
| NA | 9  | 0  | 26-Oct-15 | P | N | N |
| NA | 8  | 12 | 26-Oct-15 | P | P | N |
| NA | 7  | 35 | 26-Oct-15 | P | P | N |
| NA | 6  | 59 | 26-Oct-15 | P | P | N |
| NA | 6  | 30 | 26-Oct-15 | P | P | N |
| NA | 8  | 28 | 26-Oct-15 | P | P | N |
| NA | 9  | 23 | 20-Oct-15 | P | P | N |
| NA | 6  | 52 | 20-Oct-15 | P | P | N |
| NA | 7  | 13 | 20-Oct-10 | P | P | N |
| NA | 6  | 17 | 20-Oct-15 | P | P | N |
| NA | 7  | 41 | 20-Oct-15 | P | P | N |
| NA | 8  | 26 | 20-Oct-15 | P | N | N |
| NA | 10 | 22 | 20-Oct-15 | P | P | N |
| NA | 7  | 23 | 20-Oct-15 | P | N | N |

| asexpm | sexpm | asexoval | sexoval | ascount0 | sexcount0 | q2d28     | q18d28 | q19ad28 | q20d28    | q21ad28 |
|--------|-------|----------|---------|----------|-----------|-----------|--------|---------|-----------|---------|
| N      | N     | N        | N       | 9        | 0         | 17-Nov-14 | 1      | NA      | 20-Oct-14 | 7       |
| N      | N     | N        | N       | 0        | 0         | 17-Nov-14 | 1      | NA      | 20-Oct-14 | 11      |
| N      | N     | N        | N       | 20       | 0         | 17-Nov-14 | 1      | NA      | 20-Oct-14 | 7       |
| N      | N     | N        | N       | 0        | 0         | 17-Nov-14 | 1      | NA      | 20-Oct-14 | 8       |
| N      | N     | N        | N       | 0        | 0         | 17-Nov-14 | 1      | NA      | 20-Oct-14 | 10      |
| N      | N     | N        | N       | 0        | 0         | 18-Nov-14 | 1      | NA      | 21-Oct-14 | 7       |
| N      | N     | N        | N       | 0        | 0         | 18-Nov-14 | 1      | NA      | 21-Oct-14 | 8       |
| N      | N     | N        | N       | 0        | 0         | 24-Oct-14 | 1      | NA      | 21-Oct-14 | 9       |
| N      | N     | N        | N       | 0        | 0         | 24-Oct-14 | 1      | NA      | 21-Oct-14 | 7       |
| N      | N     | N        | N       | 0        | 0         | 18-Nov-14 | 1      | NA      | 21-Oct-14 | 6       |
| N      | N     | N        | N       | 0        | 0         | 25-Nov-14 | 1      | NA      | 28-Oct-14 | 3       |
| N      | N     | N        | N       | 347      | 0         | 25-Nov-14 | 1      | NA      | 28-Oct-14 | 3       |
| N      | N     | N        | N       | 753      | 0         | 25-Nov-14 | 1      | NA      | 28-Oct-14 | 2       |
| N      | N     | N        | N       | 1836     | 0         | 1-Dec-14  | 1      | NA      | 3-Nov-14  | 6       |
| N      | N     | N        | N       | 1378     | 0         | 1-Dec-14  | 1      | NA      | 3-Nov-14  | 7       |
| N      | N     | N        | N       | 0        | 0         | 1-Dec-14  | 3      | NA      | 3-Nov-14  |         |
| N      | N     | N        | N       | 0        | 0         | 1-Dec-14  | 1      | NA      | 3-Nov-14  | 6       |
| N      | N     | N        | N       | 7        | 0         | 2-Dec-14  | 1      | NA      | 4-Nov-14  | 6       |
| N      | N     | N        | N       | 0        | 0         | 2-Dec-14  | 1      | NA      | 4-Nov-14  | 6       |
| N      | N     | N        | N       | 694      | 0         | 2-Dec-14  | 1      | NA      | 4-Nov-14  | 7       |
| N      | N     | N        | N       | 24       | 0         | 2-Dec-14  | 1      | NA      | 4-Nov-14  | 6       |
| N      | N     | N        | N       | 579      | 0         | 2-Dec-14  | 1      | NA      | 4-Nov-14  | 8       |
| N      | N     | N        | N       | 0        | 0         | 2-Dec-14  | 1      | NA      | 4-Nov-14  | 7       |
| N      | N     | N        | N       | 10       | 0         | 2-Dec-14  | 1      | NA      | 4-Nov-14  | 7       |
| N      | N     | N        | N       | 478      | 0         | 8-Dec-14  | 1      | NA      | 10-Nov-14 | 6       |
| N      | N     | N        | N       | 11       | 0         | 8-Dec-14  | 1      | NA      | 10-Nov-14 | 7       |
| N      | N     | N        | N       | 223      | 0         | 3-Dec-14  | 1      | NA      | 10-Nov-14 | 8       |
| N      | N     | N        | N       | 482      | 0         | 8-Dec-14  | 1      | NA      | 10-Nov-14 | 6       |
| N      | N     | N        | N       | 40       | 0         | 8-Dec-14  | 1      | NA      | 10-Nov-14 | 6       |
| N      | N     | N        | N       | 0        | 0         | 9-Dec-14  | 1      | NA      | 11-Nov-14 | 2       |
| N      | N     | N        | N       | 7        | 0         | 9-Dec-14  | 1      | NA      | 11-Nov-14 | 6       |
| N      | N     | N        | N       | 463      | 0         | 9-Dec-14  | 1      | NA      | 11-Nov-14 | 7       |
| N      | N     | N        | N       | 1275     | 0         | 9-Dec-14  | 1      | NA      | 11-Nov-14 | 7       |
| N      | N     | N        | N       | 10       | 0         | 15-Dec-14 | 1      | NA      | 17-Nov-14 | 2       |
| N      | N     | N        | N       | 0        | 0         | 15-Dec-14 | 1      | NA      | 17-Nov-14 | 2       |
| N      | N     | N        | N       | 0        | 0         | 15-Dec-14 | 1      | NA      | 17-Nov-14 | 7       |
| N      | N     | N        | N       | 0        | 0         | 15-Dec-14 | 1      | NA      | 17-Nov-14 | 7       |
| N      | N     | N        | N       | 0        | 0         | 22-Dec-14 | 1      | NA      | 24-Nov-14 | 7       |
| N      | N     | N        | N       | 0        | 0         | 22-Dec-14 | 1      | NA      | 24-Nov-14 | 8       |
| N      | N     | N        | N       | 894      | 0         | 26-Dec-14 | 1      | NA      | 28-Nov-14 | 7       |
| N      | N     | N        | N       | 0        | 0         | 30-Dec-14 | 1      | NA      | 2-Dec-14  | 8       |
| N      | N     | N        | N       | 398      | 0         | 5-Jan-15  | 1      | NA      | 8-Dec-14  | 8       |
| N      | N     | N        | N       | 0        | 0         | 6-Jan-15  | 1      | NA      | 9-Dec-14  | 9       |
| N      | N     | N        | N       | 285      | 0         | 12-Jan-15 | 1      | NA      | 15-Dec-14 | 9       |
| N      | N     | N        | N       | 647      | 0         | 13-Jan-15 | 1      | NA      | 16-Dec-14 | 9       |
| N      | N     | N        | N       | 159      | 0         | 14-Jan-15 | 1      | NA      | 17-Dec-14 | 7       |

|   |   |   |   |      |   |           |      |           |    |
|---|---|---|---|------|---|-----------|------|-----------|----|
| N | N | N | N | 0    | 0 | 15-Jan-15 | 1 NA | 18-Dec-14 | 2  |
| N | N | N | N | 0    | 0 | 15-Jan-15 | 1 NA | 18-Dec-14 | 7  |
| N | N | N | N | 12   | 0 | 19-Jan-15 | 1 NA | 22-Dec-14 | 10 |
| N | N | N | N | 0    | 5 | 19-Jan-15 | 1 NA | 22-Dec-14 | 8  |
| N | N | N | N | 0    | 0 | 19-Jan-15 | 1 NA | 22-Dec-14 | 7  |
| N | N | N | N | 0    | 0 | 19-Jan-15 | 1 NA | 22-Dec-14 | 9  |
| N | N | N | N | 27   | 0 | 19-Jan-15 | 1 NA | 22-Dec-14 | 8  |
| N | N | N | N | 496  | 0 | 19-Jan-15 | 1 NA | 22-Dec-14 | 8  |
| N | N | N | N | 574  | 0 | 20-Jan-15 | 3 NA | 23-Dec-14 |    |
| N | N | N | N | 0    | 0 | 20-Jan-15 | 1 NA | 23-Dec-14 | 11 |
| N | N | N | N | 256  | 0 | 20-Jan-15 | 1 NA | 23-Dec-14 | 8  |
| N | N | N | N | 274  | 0 | 26-Jan-15 | 1 NA | 29-Dec-14 | 8  |
| N | N | N | N | 0    | 0 | 26-Jan-15 | 1 NA | 29-Dec-14 | 9  |
| N | N | N | N | 0    | 0 | 27-Jan-15 | 1 NA | 30-Jan-14 | 3  |
| N | N | N | N | 0    | 0 | 27-Jan-15 | 1 NA | 30-Dec-14 | 1  |
| N | N | N | N | 0    | 0 | 27-Jan-15 | 1 NA | 30-Dec-14 | 9  |
| N | N | N | N | 0    | 0 | 2-Feb-15  | 1 NA | 5-Jan-15  | 9  |
| N | N | N | N | 0    | 0 | 2-Feb-15  | 1 NA | 5-Jan-15  | 8  |
| N | N | N | N | 0    | 0 | 2-Feb-15  | 1 NA | 5-Jan-15  | 7  |
| N | N | N | N | 419  | 0 | 3-Feb-15  | 1 NA | 6-Jan-15  | 8  |
| N | N | N | N | 0    | 0 | 3-Feb-15  | 1 NA | 6-Jan-15  | 9  |
| N | N | N | N | 2368 | 0 | 3-Feb-15  | 1 NA | 6-Jan-15  | 7  |
| N | N | N | N | 1283 |   | 9-Feb-15  | 1 NA | 12-Jan-15 | 8  |
| N | N | N | N | 6    |   | 9-Feb-15  | 1 NA | 12-Jan-15 | 6  |
| N | N | N | N | 8    | 0 | 15-Jan-15 | 1 NA | 12-Jan-15 | 6  |
| N | N | N | N | 0    | 0 | 17-Feb-15 | 1 NA | 20-Jan-15 | 9  |
| N | N | N | N | 31   | 0 | 23-Feb-15 | 1 NA | 26-Feb-15 | 7  |
| N | N | N | N | 97   | 0 | 23-Feb-15 | 1 NA | 26-Jan-15 | 3  |
| N | N | N | N | 15   |   | 23-Feb-15 | 1 NA | 26-Jan-15 | 3  |
|   |   |   |   |      |   | 2-Mar-15  | 1 NA | 2-Feb-15  | 8  |
|   |   |   |   |      |   | 2-Mar-15  | 1 NA | 2-Feb-15  | 7  |
| N | N | N | N | 623  |   | 17-Feb-15 | 1 NA | 20-Jan-15 | 10 |
| N | N | N | N | 1    | 0 | 13-Jan-15 | 1 NA | 16-Dec-14 | 8  |
| N | N | N | N | 422  |   | 12-Oct-15 | 1 NA | 14-Sep-15 | 1  |
| N | N | N | N | 1    |   | 12-Oct-15 | 1 NA | 14-Sep-15 | 8  |
| N | N | N | N | 1295 |   | 12-Oct-15 | 1 NA | 14-Sep-15 | 6  |
| N | N | N | N | 0    | 0 | 12-Oct-15 | 1 NA | 14-Sep-15 | 7  |
| N | N | N | N | 3685 |   | 6-Oct-15  | 1 NA | 8-Sep-15  | 7  |
| N | N | N | N | 1    |   | 6-Oct-15  | 1 NA | 8-Sep-15  | 8  |
| N | N | N | N | 527  |   | 6-Oct-15  | 1 NA | 8-Sep-15  | 7  |
| N | N | N | N | 2    | 7 | 6-Oct-15  | 1 NA | 8-Sep-15  | 6  |
| N | N | N | N | 1    |   | 6-Oct-15  | 1 NA | 8-Sep-15  | 6  |
| N | N | N | N |      |   | 6-Oct-15  | 1 NA | 8-Sep-15  | 8  |
| N | N | N | N |      |   | 11-Sep-15 | 1 NA | 8-Sep-15  | 9  |
| N | N | N | N | 665  |   | 6-Oct-15  | 1 NA | 8-Sep-15  | 6  |
| N | N | N | N |      |   | 6-Oct-15  | 1 NA | 8-Sep-15  | 8  |
| N | N | N | N |      |   | 6-Oct-15  | 3 NA | 8-Sep-15  |    |

|   |   |   |   |      |            |      |           |    |
|---|---|---|---|------|------------|------|-----------|----|
| N | N | N | N | 50   | 5-Oct-15   | 1 NA | 7-Sep-15  | 5  |
| N | N | N | N | 2563 | 10-Sep-15  | 1 NA | 7-Sep-15  | 7  |
| N | N | N | N |      | 5-Oct-15   | 1 NA | 7-Sep-15  | 6  |
| N | N | N | N | 0    | 0 5-Oct-15 | 1 NA |           |    |
|   | N | N | N | 794  | 1-Dec-15   | 1 NA | 3-Nov-15  | 11 |
|   | N |   | N | 1    | 1-Dec-15   | 1 NA | 3-Nov-15  | 6  |
| N | N | N | N |      | 1-Dec-15   | 1 NA | 3-Nov-15  | 7  |
| N | N | N | N | 794  | 1-Dec-15   | 1 NA | 3-Nov-15  | 7  |
|   | N |   | N | 1    | 1-Dec-15   | 1 NA | 3-Nov-15  | 6  |
| N | N | N | N | 1    | 1-Dec-15   | 1 NA | 3-Nov-15  | 7  |
| N | N | N | N | 1253 | 1-Dec-15   | 1 NA | 3-Nov-15  | 7  |
|   | N |   | N | 482  | 1-Dec-15   | 1 NA | 3-Nov-15  | 7  |
|   | N |   | N | 395  | 6-Nov-15   | 1 NA | 3-Nov-15  | 7  |
| N | N | N | N | 15   | 1-Dec-15   | 1 NA | 3-Nov-15  | 8  |
| N | N | N | N |      | 1-Dec-15   | 1 NA | 3-Nov-15  | 6  |
|   | N |   | N | 1135 | 1-Dec-15   | 1 NA | 3-Nov-15  | 6  |
|   | N |   | N | 1    | 1-Dec-15   | 1 NA | 3-Nov-15  | 2  |
|   | N |   | N | 539  | 30-Nov-15  | 1 NA | 2-Nov-15  | 10 |
|   | N |   | N | 12   | 30-Nov-15  | 1 NA | 2-Nov-15  | 7  |
|   | N |   | N | 684  | 30-Nov-15  | 1 NA | 2-Nov-15  | 6  |
|   | N |   | N | 1283 | 30-Nov-15  | 1 NA | 2-Nov-15  | 7  |
|   | N |   | N | 295  | 30-Nov-15  | 1 NA | 2-Nov-15  | 6  |
|   | N |   | N | 3586 | 30-Nov-15  | 1 NA | 2-Nov-15  | 7  |
|   | N |   | N | 643  | 30-Nov-15  | 1 NA | 2-Nov-15  | 8  |
|   | N |   | N | 794  | 30-Nov-15  | 1 NA | 2-Nov-15  | 6  |
|   | N |   | N | 896  | 30-Nov-15  | 1 NA | 2-Nov-15  | 7  |
|   | N |   | N | 1248 | 30-Nov-15  | 1 NA | 2-Nov-15  | 2  |
|   | N |   | N | 369  | 30-Nov-15  | 1 NA | 2-Nov-15  | 8  |
| N | N | N | N | 1    | 30-Nov-15  | 1 NA | 2-Nov-15  | 8  |
| N | N | N | N | 3    | 24-Nov-15  | 1 NA | 27-Oct-15 | 9  |
| N | N | N | N | 12   | 24-Nov-15  | 1 NA | 27-Oct-15 | 7  |
| N | N | N | N | 3875 | 5-Oct-15   | 1 NA | 7-Sep-15  | 6  |
| N | N | N | N | 13   | 5-Oct-15   | 1 NA | 7-Sep-15  | 7  |
| N | N | N | N |      | 5-Oct-15   | 1 NA | 7-Sep-15  | 8  |
| N | N | N | N | 1387 | 5-Oct-15   | 1 NA | 7-Sep-15  | 6  |
| N | N | N | N | 1    | 5-Oct-15   | 1 NA | 7-Sep-15  | 7  |
| N | N | N | N | 269  | 5-Oct-15   | 1 NA | 7-Sep-15  | 8  |
| N | N | N | N | 2988 | 5-Oct-15   | 1 NA | 7-Sep-15  | 12 |
| N | N | N | N | 237  | 29-Sep-15  | 1 NA | 1-Sep-15  | 6  |
| N | N | N | N | 12   | 29-Sep-15  | 1 NA | 1-Sep-15  | 6  |
| N | N | N | N | 822  | 4-Sep-15   | 1 NA | 1-Sep-15  | 7  |
| N | N | N | N | 8    | 29-Sep-15  | 1 NA | 1-Sep-15  | 12 |
| N | N | N | N | 9    | 29-Sep-15  | 1 NA | 1-Sep-15  | 7  |
| N | N | N | N | 768  | 29-Sep-15  | 1 NA | 1-Sep-15  | 6  |
| N | N | N | N | 1    | 29-Sep-15  | 1 NA | 1-Sep-15  | 8  |
| N | N | N | N | 35   | 29-Sep-15  | 1 NA | 1-Sep-15  | 6  |
| N | N | N | N | 1    | 28-Sep-15  | 1 NA | 31-Aug-15 | 8  |

|   |   |   |   |      |   |           |      |           |    |
|---|---|---|---|------|---|-----------|------|-----------|----|
| N | N | N | N | 1397 |   | 28-Sep-15 | 1 NA | 31-Aug-15 | 7  |
| N | N | N | N | 5    |   | 3-Sep-15  | 1 NA | 31-Aug-15 | 6  |
| N | N | N | N |      |   | 28-Sep-15 | 1 NA | 31-Aug-15 | 6  |
| N | N | N | N | 895  |   | 28-Sep-15 | 1 NA | 31-Aug-15 | 8  |
| N | N | N | N |      |   | 29-Sep-15 | 1 NA | 1-Sep-15  | 7  |
| N | N | N | N | 148  |   | 17-Nov-15 | 1 NA | 20-Oct-15 | 6  |
| N | N | N | N | 2275 |   | 22-Oct-15 | 1 NA | 19-Oct-15 | 8  |
| N | N | N | N | 473  |   | 16-Nov-15 | 1 NA | 19-Oct-15 | 7  |
| N | N | N | N | 2198 |   | 16-Nov-15 | 1 NA | 19-Oct-15 | 8  |
| N | N | N | N | 893  |   | 16-Nov-15 | 1 NA | 19-Oct-15 | 7  |
| N | N | N | N | 0    |   | 16-Nov-15 | 1 NA | 19-Oct-15 | 7  |
| N | N | N | N | 1243 |   | 16-Nov-15 | 1 NA | 19-Oct-15 | 6  |
| N | N | N | N | 1197 |   | 16-Nov-15 | 1 NA | 19-Oct-15 | 6  |
| N | N | N | N | 1375 |   | 16-Nov-15 | 1 NA | 19-Oct-15 | 6  |
| N | N | N | N | 2264 |   | 16-Nov-15 | 1 NA | 19-Oct-15 | 8  |
| N | N | N | N | 1298 |   | 16-Oct-15 | 1 NA | 19-Oct-15 | 7  |
| N | N | N | N | 541  |   | 16-Oct-15 | 1 NA | 19-Oct-15 | 6  |
| N | N | N | N | 219  |   | 16-Oct-15 | 1 NA | 13-Oct-15 | 7  |
| N | N | N | N | 1655 |   | 10-Nov-15 | 1 NA | 13-Oct-15 | 9  |
| N | N | N | N | 902  |   | 10-Nov-15 | 1 NA | 13-Oct-15 | 6  |
| N | N | N | N | 967  |   | 16-Oct-15 | 1 NA | 13-Oct-15 | 5  |
| N | N | N | N | 227  |   | 10-Nov-15 | 1 NA | 13-Oct-15 | 10 |
| N | N | N | N | 442  |   | 10-Nov-15 | 1 NA | 13-Oct-15 | 7  |
| N | N | N | N | 1275 |   | 10-Nov-15 | 1 NA | 13-Oct-15 | 7  |
| N | N | N | N | 729  |   | 10-Nov-15 | 1 NA | 13-Oct-15 | 6  |
| N | N | N | N |      |   | 10-Nov-15 | 1 NA | 13-Oct-15 | 7  |
| N | N | N | N | 552  |   | 9-Nov-15  | 1 NA | 12-Oct-15 | 6  |
| N | N | N | N | 510  |   | 9-Nov-15  | 1 NA | 12-Oct-15 | 10 |
| N | N | N | N |      |   | 9-Nov-15  | 1 NA | 12-Oct-15 | 9  |
| N | N | N | N | 3116 |   | 9-Nov-15  | 1 NA | 12-Oct-15 | 7  |
| N | N | N | N | 1    | 4 | 9-Nov-15  | 1 NA | 12-Oct-15 | 7  |
| N | N | N | N | 2967 |   | 9-Nov-15  | 1 NA | 12-Oct-15 | 6  |
| N | N | N | N | 97   |   | 9-Nov-15  | 1 NA | 12-Oct-15 | 9  |
| N | N | N | N | 1421 |   | 9-Nov-15  | 1 NA | 12-Oct-15 | 6  |
| N | N | N | N | 736  |   | 9-Nov-15  | 1 NA | 12-Oct-15 | 4  |
| N | N | N | N | 1005 |   | 26-Oct-15 | 1 NA | 28-Sep-15 | 7  |
| N | N | N | N | 0    | 0 | 20-Oct-15 | 1 NA | 22-Sep-15 | 6  |
| N | N | N | N | 1614 |   | 20-Oct-15 | 1 NA | 22-Sep-15 | 7  |
| N | N | N | N |      |   | 20-Oct-15 | 1 NA | 22-Sep-15 | 6  |
| N | N | N | N | 1581 |   | 20-Oct-15 | 1 NA | 22-Sep-15 | 7  |
| N | N | N | N | 2912 |   | 20-Oct-15 | 1 NA | 22-Sep-15 | 8  |
| N | N | N | N | 1206 |   | 25-Sep-15 | 1 NA | 22-Sep-15 | 7  |
| N | N | N | N | 13   |   | 10-Oct-15 | 1 NA | 22-Sep-15 | 7  |
| N | N | N | N | 1974 |   | 20-Oct-15 | 1 NA | 22-Sep-15 | 6  |
| N | N | N | N | 1433 |   | 20-Oct-15 | 1 NA | 22-Sep-15 | 6  |
| N | N | N | N |      |   | 13-Oct-15 | 1 NA | 15-Sep-15 | 7  |
| N | N | N | N | 1358 | 0 | 13-Oct-15 | 1 NA | 15-Sep-15 | 6  |

|   |   |   |   |      |             |      |           |    |
|---|---|---|---|------|-------------|------|-----------|----|
| N | N | N | N |      | 13-Oct-15   | 1 NA | 15-Sep-15 | 6  |
| N | N | N | N | 1296 | 13-Oct-15   | 1 NA | 15-Sep-15 | 7  |
| N | N | N | N | 1296 | 13-Oct-15   | 1 NA | 15-Sep-15 | 6  |
| N | N | N | N | 0    | 1 13-Oct-15 | 1 NA | 15-Sep-15 | 6  |
| N | N | N | N | 1365 | 13-Oct-15   | 1 NA | 15-Sep-15 | 6  |
| N | N | N | N |      | 13-Oct-15   | 1 NA | 15-Sep-15 | 3  |
| N | N | N | N | 0    | 13-Oct-15   | 1 NA | 15-Sep-15 | 7  |
| N | N | N | N | 2    | 1 13-Oct-15 | 1 NA | 15-Sep-15 | 7  |
| N | N | N | N | 1472 | 13-Oct-15   | 1 NA | 15-Sep-15 | 7  |
| N | N | N | N | 1379 | 12-Oct-15   | 1 NA | 14-Sep-15 | 6  |
| N | N | N | N | 247  | 12-Oct-15   | 1 NA | 14-Sep-15 | 7  |
| N | N | N | N | 78   | 12-Oct-15   | 1 NA | 14-Sep-15 | 7  |
| N | N | N | N | 836  | 0 12-Oct-15 | 1 NA | 14-Sep-15 | 7  |
| N | N | N | N | 2    | 12-Oct-15   | 1 NA | 14-Sep-15 | 6  |
| N | N | N | N | 1    | 20-Oct-15   | 1 NA | 22-Sep-15 | 11 |
| N | N | N | N | 25   | 28-Sep-15   | 1 NA | 31-Aug-15 | 7  |
| N | N | N | N | 1238 | 28-Sep-15   | 1 NA | 31-Aug-15 | 8  |
| N | N | N | N | 299  | 28-Sep-15   | 1 NA | 31-Aug-15 | 7  |
| N | N | N | N | 926  | 28-Sep-15   | 1 NA | 31-Aug-15 | 7  |
| N | N | N | N | 15   | 28-Sep-15   | 1 NA | 31-Aug-15 | 10 |
| N | N | N | N | 127  | 22-Sep-15   | 1 NA | 25-Aug-15 | 8  |
| N | N | N | N | 1215 | 22-Sep-15   | 1 NA | 25-Aug-15 | 6  |
| N | N | N | N | 26   | 22-Sep-15   | 1 NA | 25-Aug-15 | 7  |
| N | N | N | N |      | 22-Sep-15   | 1 NA | 25-Aug-15 | 7  |
| N | N | N | N |      | 22-Sep-15   | 1 NA | 25-Aug-15 | 8  |
| N | N | N | N | 368  | 22-Sep-15   | 1 NA | 25-Aug-15 | 7  |
| N | N | N | N | 35   | 22-Sep-15   | 1 NA | 25-Aug-15 | 8  |
| N | N | N | N | 35   | 22-Sep-15   | 1 NA | 25-Aug-15 | 6  |
| N | N | N | N | 770  | 22-Sep-15   | 1 NA | 25-Aug-15 | 7  |
| N | N | N | N | 679  | 22-Sep-15   | 1 NA | 25-Aug-15 | 6  |
| N | N | N | N |      | 21-Sep-15   | 1 NA | 24-Aug-15 | 11 |
| N | N | N | N |      | 4 21-Sep-15 | 1 NA | 24-Aug-15 | 10 |
| N | N | N | N | 426  | 21-Sep-15   | 1 NA | 24-Aug-15 | 8  |
| N | N | N | N | 2587 | 21-Sep-15   | 1 NA | 24-Aug-15 | 8  |
| N | N | N | N | 1    | 21-Sep-15   | 1 NA | 24-Aug-15 | 8  |
| N | N | N | N | 1    | 21-Sep-15   | 1 NA | 24-Aug-15 | 8  |
| N | N | N | N | 476  | 21-Sep-15   | 1 NA | 24-Aug-15 | 9  |
| N | N | N | N |      | 21-Sep-15   | 1 NA | 24-Aug-15 | 11 |
| N | N | N | N | 1    | 21-Sep-15   | 1 NA | 24-Aug-15 | 9  |
| N | N | N | N | 2479 | 21-Sep-15   | 1 NA | 24-Aug-15 | 7  |
| N | N | N | N | 1298 | 21-Sep-15   | 1 NA | 24-Aug-15 | 8  |
| N | N | N | N |      | 21-Sep-15   | 1 NA | 24-Aug-15 | 9  |
| N | N | N | N | 476  | 21-Sep-15   | 1 NA | 24-Aug-15 | 8  |
| N | N | N | N | 739  | 15-Sep-15   | 1 NA | 18-Aug-15 | 7  |
| N | N | N | N | 189  | 15-Sep-15   | 3 NA | 18-Aug-15 |    |
|   | N |   | N | 285  | 14-Sep-15   | 1 NA | 17-Aug-15 | 8  |
| N | N | N | N |      | 14-Sep-15   | 1 NA | 17-Aug-15 | 9  |

|   |   |   |   |      |             |      |           |    |
|---|---|---|---|------|-------------|------|-----------|----|
| N | N | N | N | 1    | 14-Sep-15   | 1 NA | 17-Aug-15 | 1  |
| N | N | N | N |      | 14-Sep-15   | 1 NA | 17-Aug-15 | 1  |
| N | N | N | N | 846  | 14-Sep-15   | 1 NA | 17-Aug-15 | 9  |
| N | N | N | N | 1643 | 14-Sep-15   | 1 NA | 17-Aug-15 | 11 |
| N | N | N | N | 0    | 3-Nov-15    | 1 NA | 6-Oct-15  | 7  |
| N | N | N | N | 46   | 3-Nov-15    | 1 NA | 6-Oct-15  | 7  |
| N | N | N | N | 1629 | 3-Nov-15    | 1 NA | 6-Oct-15  | 6  |
| N | N | N | N | 1597 | 3-Nov-15    | 1 NA | 6-Oct-15  | 1  |
| N | N | N | N | 524  | 3-Nov-15    | 1 NA | 6-Oct-15  | 8  |
| N | N | N | N | 5    | 2-Nov-15    | 1 NA | 5-Oct-15  | 1  |
| N | N | N | N | 606  | 3-Nov-15    | 1 NA | 6-Oct-15  | 6  |
| N | N | N | N | 1989 | 2-Nov-15    | 1 NA | 5-Oct-15  | 7  |
| N | N | N | N | 429  | 2-Nov-15    | 1 NA | 5-Oct-15  | 7  |
| N | N | N | N | 285  | 2-Nov-15    | 1 NA | 5-Oct-15  | 7  |
| N | N | N | N |      | 2-Nov-15    | 1 NA | 5-Oct-15  | 7  |
| N | N | N | N | 255  | 2-Nov-15    | 1 NA | 5-Oct-15  | 8  |
| N | N | N | N | 2379 | 2-Nov-15    | 1 NA | 5-Oct-15  | 7  |
| N | N | N | N | 357  | 27-Oct-15   | 1 NA | 29-Sep-15 | 8  |
| N | N | N | N |      | 27-Oct-15   | 1 NA | 29-Sep-15 | 6  |
| N | N | N | N |      | 27-Oct-15   | 1 NA | 29-Sep-15 | 7  |
| N | N | N | N | 1735 | 27-Oct-15   | 1 NA | 29-Sep-15 | 7  |
| N | N | N | N | 2211 | 27-Oct-15   | 1 NA | 29-Sep-15 | 6  |
| N | N | N | N | 5    | 27-Oct-15   | 1 NA | 29-Sep-15 | 6  |
| N | N | N | N | 2    | 27-Oct-15   | 1 NA | 29-Sep-15 | 7  |
| N | N | N | N |      | 27-Oct-15   | 1 NA | 29-Sep-15 | 6  |
| N | N | N | N | 1    | 1 27-Oct-15 | 1 NA | 29-Sep-15 | 7  |
| N | N | N | N | 317  | 26-Oct-15   | 1 NA | 28-Oct-15 | 7  |
| N | N | N | N | 0    | 0 26-Oct-15 | 1 NA | 28-Sep-15 | 7  |
| N | N | N | N | 0    | 26-Oct-15   | 1 NA | 28-Sep-15 | 7  |
| N | N | N | N | 0    | 0 26-Oct-15 | 1 NA | 28-Sep-15 | 8  |
| N | N | N | N | 2715 | 26-Oct-15   | 1 NA | 28-Sep-15 | 6  |
| N | N | N | N | 126  | 26-Oct-15   | 1 NA | 28-Sep-15 | 2  |
| N | N | N | N | 64   | 26-Oct-15   | 1 NA | 28-Sep-15 | 3  |
| N | N | N | N | 1163 | 26-Oct-15   | 1 NA | 28-Sep-15 | 6  |
| N | N | N | N | 124  | 26-Oct-15   | 1 NA | 28-Sep-15 | 8  |
| N | N | N | N | 0    | 24-Nov-15   | 1 NA | 27-Oct-15 | 6  |
| N | N | N | N | 693  | 24-Nov-15   | 1 NA | 27-Oct-15 | 8  |
| N | N | N | N | 1    | 24-Nov-15   | 1 NA | 27-Oct-15 | 6  |
| N | N | N | N | 195  | 24-Nov-15   | 1 NA | 27-Oct-15 | 7  |
| N | N | N | N | 837  | 24-Nov-15   | 1 NA | 27-Oct-15 | 7  |
| N | N | N | N | 2984 | 24-Nov-15   | 1 NA | 27-Oct-15 | 8  |
| N | N | N | N | 15   | 24-Nov-15   | 1 NA | 27-Oct-15 | 8  |
| N | N | N | N | 296  | 30-Oct-15   | 1 NA | 27-Oct-15 | 7  |
| N | N | N | N | 1175 | 24-Nov-15   | 1 NA | 27-Oct-15 | 6  |
| N | N | N | N | 526  | 23-Nov-15   | 1 NA | 26-Oct-15 | 4  |
| N | N | N | N | 974  | 23-Nov-15   | 1 NA | 26-Oct-15 | 6  |
| N | N | N | N | 0    | 0 23-Nov-15 | 1 NA | 26-Oct-15 | 7  |



|   |   |   |   |      |   |           |      |           |   |
|---|---|---|---|------|---|-----------|------|-----------|---|
| N | N | N | N | 0    | 0 | 23-Nov-15 | 1 NA | 26-Nov-15 | 7 |
| N | N | N | N | 2793 |   | 23-Nov-15 | 1 NA | 26-Oct-15 | 6 |
| N | N | N | N | 1895 |   | 23-Nov-15 | 1 NA | 26-Oct-15 | 8 |
| N | N | N | N | 1268 |   | 23-Nov-15 | 1 NA | 26-Oct-15 | 7 |
| N | N | N | N | 0    | 0 | 23-Nov-15 | 1 NA | 26-Oct-15 | 9 |
| N | N | N | N | 736  |   | 23-Nov-15 | 1 NA | 26-Oct-15 | 7 |
| N | N | N | N | 967  |   | 23-Nov-15 | 1 NA | 26-Oct-15 | 8 |
| N | N | N | N | 1287 |   | 23-Nov-15 | 1 NA | 26-Oct-15 | 7 |
| N | N | N | N | 2    |   | 23-Nov-15 | 1 NA | 26-Oct-15 | 6 |
| N | N | N | N | 946  |   | 23-Nov-15 | 1 NA | 26-Oct-15 | 8 |
| N | N | N | N | 1    |   | 17-Nov-15 | 1 NA | 20-Oct-15 | 9 |
| N | N | N | N | 163  |   | 17-Nov-15 | 1 NA | 20-Oct-15 | 6 |
| N | N | N | N | 975  |   | 17-Nov-15 | 1 NA | 20-Oct-15 | 7 |
| N | N | N | N | 2    |   | 17-Nov-15 | 1 NA | 20-Oct-15 | 9 |
| N | N | N | N | 1    |   | 17-Nov-15 | 1 NA | 20-Oct-15 | 7 |
| N | N | N | N |      |   | 17-Nov-15 | 1 NA | 20-Oct-15 | 8 |
| N | N | N | N | 1248 |   | 17-Oct-15 | 1 NA | 20-Oct-15 | 7 |
| N | N | N | N |      |   | 17-Nov-15 | 1 NA | 20-Oct-15 | 8 |

| q21bd28 | q22d28 | q23d28 | q24d28 | q25d28 | q26d28 | q27d28    | q28d28 | q29d28 | q30d28 | q31d28 | q32d28 |
|---------|--------|--------|--------|--------|--------|-----------|--------|--------|--------|--------|--------|
| 32      | 2      | 3      | 1      | 2      | 88     | 17-Nov-14 | 1      | 2      | 2      | 1      | 2      |
| 8       | 2      | 3      | 1      | 2      | 88     | 17-Nov-14 | 2      |        |        |        |        |
| 10      | 2      | 3      | 1      | 2      | 88     | 17-Nov-14 | 2      |        |        |        |        |
| 30      | 2      | 3      | 1      | 2      | 88     | 17-Nov-14 | 1      | 2      | 2      | 1      | 2      |
| 0       | 2      | 3      | 1      | 2      | 88     | 27-Nov-14 | 2      |        |        |        |        |
| 40      | 2      | 3      | 1      | 2      | 88     | 18-Nov-14 | 2      |        |        |        |        |
| 10      | 2      | 3      | 1      | 2      | 88     | 18-Nov-14 | 2      |        |        |        |        |
| 17      | 2      | 3      | 1      | 2      | 88     | 18-Nov-14 | 2      |        |        |        |        |
| 20      | 2      | 3      | 1      | 2      | 88     | 18-Nov-14 | 2      |        |        |        |        |
| 50      | 2      | 3      | 1      | 2      | 88     | 18-Nov-14 | 2      |        |        |        |        |
| 47      | 2      | 3      | 2      | 2      | 88     | 25-Nov-14 | 2      |        |        |        |        |
| 8       | 2      | 3      | 1      | 2      | 88     | 25-Nov-14 | 1      | 2      | 2      | 1      | 2      |
| 45      | 2      | 3      | 1      | 2      | 88     | 25-Nov-14 | 2      |        |        |        |        |
| 30      | 2      | 3      | 1      | 2      | 88     | 1-Dec-14  | 2      |        |        |        |        |
| 37      | 2      | 3      | 1      | 2      | 88     | 1-Dec-14  | 2      |        |        |        |        |
| 55      | 2      | 3      | 1      | 2      | 88     | 1-Dec-14  | 2      |        |        |        |        |
| 36      | 2      | 3      | 1      | 2      | 88     | 2-Dec-14  | 2      |        |        |        |        |
| 30      | 2      | 3      | 1      | 2      | 88     | 2-Dec-14  | 2      |        |        |        |        |
| 14      | 2      | 3      | 1      | 2      | 88     | 2-Dec-14  | 2      |        |        |        |        |
| 44      | 2      | 3      | 1      | 2      | 88     | 2-Dec-14  | 2      |        |        |        |        |
| 18      | 2      | 3      | 1      | 2      | 88     | 2-Dec-14  | 1      | 2      | 2      | 1      |        |
| 43      | 2      | 3      | 1      | 2      | 88     | 2-Feb-14  | 2      |        |        |        |        |
| 30      | 2      | 3      | 1      | 2      | 88     | 2-Feb-14  | 2      |        |        |        |        |
| 50      | 2      | 3      | 1      | 2      | 88     | 8-Dec-14  | 2      |        |        |        |        |
| 15      | 2      | 3      | 1      | 2      | 88     | 8-Dec-14  | 2      |        |        |        |        |
| 54      | 2      | 3      | 1      | 2      | 88     | 8-Dec-14  | 2      |        |        |        |        |
| 25      | 2      | 3      | 1      | 2      | 88     | 8-Dec-14  | 2      |        |        |        |        |
| 8       | 2      | 3      | 1      | 2      | 88     | 8-Dec-14  | 2      |        |        |        |        |
| 30      | 2      | 3      | 1      | 2      | 88     | 9-Dec-14  | 2      |        |        |        |        |
| 40      | 2      | 3      | 1      | 2      | 88     | 9-Dec-14  | 2      |        |        |        |        |
| 0       | 2      | 3      | 1      | 2      | 88     | 9-Dec-14  | 1      | 2      | 2      | 1      |        |
| 33      | 2      | 3      | 1      | 2      | 88     | 9-Dec-14  | 2      |        |        |        |        |
| 41      | 2      | 3      | 1      | 2      | 88     | 15-Dec-14 | 2      |        |        |        |        |
| 15      | 2      | 3      | 1      | 2      | 88     |           |        |        |        |        |        |
| 40      | 2      | 3      | 1      | 2      | 88     | 15-Dec-14 | 2      |        |        |        |        |
| 15      | 2      | 3      | 1      | 2      | 88     | 15-Dec-14 | 2      |        |        |        |        |
| 50      | 2      | 3      | 1      | 2      | 88     | 22-Dec-14 | 1      | 2      | 2      | 1      |        |
| 20      | 2      | 3      | 1      | 2      | 88     | 22-Dec-14 | 2      |        |        |        |        |
| 10      | 2      | 3      | 1      | 2      | 88     | 26-Dec-14 | 2      |        |        |        |        |
| 30      | 2      | 3      | 1      | 2      | 88     | 30-Dec-14 | 2      |        |        |        |        |
| 35      | 2      | 3      | 1      | 2      | 88     | 5-Dec-14  | 1      | 2      | 2      | 1      |        |
| 40      | 2      | 3      | 1      | 2      | 88     | 6-Jan-15  | 2      |        |        |        |        |
| 11      | 2      | 3      | 1      | 2      | 88     | 12-Jan-15 | 2      |        |        |        |        |
| 4       | 1      | 3      | 1      | 2      | 88     | 13-Jan-15 | 1      | 2      | 1      |        |        |
| 16      | 2      | 3      | 1      | 2      | 88     | 14-Jan-15 | 2      |        |        |        |        |

|    |   |   |   |   |    |           |   |   |   |   |   |  |
|----|---|---|---|---|----|-----------|---|---|---|---|---|--|
| 49 | 2 | 3 | 1 | 2 | 88 | 15-Jan-15 | 2 |   |   |   |   |  |
| 30 | 2 | 3 | 1 | 2 | 88 | 15-Jan-15 | 2 |   |   |   |   |  |
| 20 | 2 | 3 | 1 | 2 | 88 | 19-Jan-15 | 2 |   |   |   |   |  |
| 33 | 2 | 3 | 1 | 2 | 88 | 19-Jan-15 | 2 |   |   |   |   |  |
| 50 | 2 | 3 | 1 | 2 | 88 | 19-Jan-15 | 2 |   |   |   |   |  |
| 30 | 2 | 3 | 1 | 2 | 88 | 19-Jan-15 | 2 |   |   |   |   |  |
| 58 | 2 | 3 | 1 | 2 | 88 | 19-Jan-15 | 2 |   |   |   |   |  |
| 33 | 2 | 3 | 1 | 2 | 88 | 19-Jan-15 | 1 | 2 | 2 | 1 | 2 |  |
| 35 | 2 | 3 | 1 | 2 | 88 | 20-Jan-15 | 2 |   |   |   |   |  |
| 40 | 2 | 3 | 1 | 2 | 88 | 20-Jan-15 | 2 |   |   |   |   |  |
| 40 | 2 | 3 | 1 | 2 | 88 | 26-Jan-15 | 1 | 2 | 2 | 1 | 2 |  |
| 10 | 2 | 3 | 1 | 2 | 88 | 26-Jan-15 | 2 |   |   |   |   |  |
| 15 | 2 | 3 | 1 | 2 | 88 | 27-Jan-15 | 2 |   |   |   |   |  |
| 34 | 2 | 3 | 1 | 2 | 88 | 27-Jan-15 | 2 |   |   |   |   |  |
| 15 | 2 | 3 | 1 | 2 | 88 | 27-Jan-15 | 2 |   |   |   |   |  |
| 10 | 2 | 3 | 1 | 2 | 88 | 2-Feb-15  | 2 |   |   |   |   |  |
| 40 | 2 | 3 | 1 | 2 | 88 | 2-Feb-15  | 2 |   |   |   |   |  |
| 40 | 2 | 3 | 1 | 2 | 88 | 2-Feb-15  | 2 |   |   |   |   |  |
| 3  | 2 | 3 | 1 | 2 | 88 | 3-Feb-15  | 2 |   |   |   |   |  |
| 16 | 2 | 3 | 1 | 2 | 88 | 3-Feb-15  | 2 |   |   |   |   |  |
| 40 | 2 | 3 | 1 | 2 | 88 | 3-Feb-15  | 1 | 2 | 2 | 1 | 2 |  |
| 49 | 2 | 3 | 1 | 2 | 88 | 9-Feb-15  | 2 |   |   |   |   |  |
| 48 | 1 | 3 | 1 | 2 | 88 | 9-Feb-15  | 2 |   |   |   |   |  |
| 40 | 2 | 3 | 1 | 2 | 88 | 9-Feb-15  | 2 |   |   |   |   |  |
| 35 | 2 | 3 | 1 | 2 | 88 | 17-Feb-15 | 2 |   |   |   |   |  |
| 10 | 2 | 3 | 1 | 2 | 88 | 23-Feb-15 | 2 |   |   |   |   |  |
| 30 | 2 | 3 | 1 | 2 | 88 | 23-Feb-15 | 2 |   |   |   |   |  |
| 2  | 2 | 3 | 1 | 2 | 88 | 23-Feb-15 | 2 |   |   |   |   |  |
| 41 | 2 | 3 | 1 | 2 | 88 | 2-Mar-15  | 2 |   |   |   |   |  |
| 30 | 2 | 3 | 1 | 2 | 88 | 2-Mar-15  | 2 |   |   |   |   |  |
| 55 | 2 | 3 | 1 | 2 | 88 | 17-Feb-15 | 2 |   |   |   |   |  |
| 40 | 2 | 3 | 1 | 2 | 88 | 13-Jan-15 | 2 |   |   |   |   |  |
| 20 | 2 | 3 | 1 | 2 | 88 | 12-Oct-15 | 2 |   |   |   |   |  |
| 5  | 2 | 3 | 1 | 2 | 88 | 12-Oct-15 | 1 |   | 2 | 1 |   |  |
| 10 | 2 | 3 | 1 | 2 | 88 | 12-Oct-15 | 1 | 2 | 2 | 1 |   |  |
| 10 | 2 | 3 | 1 | 2 | 88 | 12-Oct-15 | 2 |   |   |   |   |  |
| 0  | 2 | 3 | 1 | 2 | 88 | 6-Oct-15  | 1 | 2 | 2 | 1 |   |  |
| 3  | 2 | 3 | 1 | 2 | 88 | 6-Oct-15  | 2 |   |   |   |   |  |
| 26 | 2 | 3 | 1 | 1 | 2  | 6-Oct-15  | 1 | 2 | 2 | 1 |   |  |
| 37 | 2 | 3 | 1 | 2 | 88 | 6-Oct-15  | 2 |   |   |   |   |  |
| 15 | 2 | 3 | 1 | 2 | 88 | 6-Oct-15  | 2 |   |   |   |   |  |
| 50 | 2 | 3 | 1 | 2 | 88 | 6-Oct-15  | 2 |   |   |   |   |  |
| 0  | 2 | 3 | 1 | 2 | 88 | 6-Oct-15  | 2 |   |   |   |   |  |
| 45 | 2 | 3 | 1 | 2 | 88 | 6-Oct-15  | 1 | 2 | 2 | 1 | 2 |  |
| 12 | 2 | 3 | 1 | 2 | 88 | 6-Oct-15  | 2 |   |   |   |   |  |

|    |   |   |   |   |    |           |   |   |   |   |   |
|----|---|---|---|---|----|-----------|---|---|---|---|---|
| 20 | 2 | 3 | 1 | 2 | 88 | 5-Oct-15  | 2 |   |   |   |   |
| 29 | 2 | 3 | 1 | 2 | 88 | 5-Oct-15  | 1 | 2 | 2 | 1 |   |
| 37 | 2 | 3 | 1 | 2 | 88 | 5-Oct-15  | 2 |   |   |   |   |
|    | 2 | 3 | 1 | 2 | 88 | 5-Oct-15  | 2 |   |   |   |   |
| 12 | 2 | 3 | 1 | 2 | 88 | 1-Dec-15  | 2 |   |   |   |   |
| 44 | 2 | 3 | 1 | 2 | 88 | 1-Dec-15  | 2 |   |   |   |   |
| 25 | 2 | 3 | 1 | 2 | 88 | 1-Dec-15  | 2 |   |   |   |   |
| 40 | 2 | 3 | 1 | 2 | 88 | 1-Dec-15  | 2 |   |   |   |   |
| 18 | 2 | 3 | 1 | 2 | 88 | 1-Dec-15  | 2 |   |   |   |   |
| 0  | 2 | 3 | 1 | 2 | 88 | 1-Dec-15  | 2 |   |   |   |   |
| 8  | 2 | 3 | 1 | 2 | 88 | 1-Dec-15  | 2 |   |   |   |   |
| 10 | 2 | 3 | 1 | 2 | 88 | 1-Dec-15  | 2 |   |   |   |   |
| 40 | 2 | 3 | 1 | 2 | 88 | 1-Dec-15  | 2 |   |   |   |   |
| 50 | 2 | 3 | 1 | 2 | 88 | 1-Dec-15  | 2 |   |   |   |   |
| 31 | 2 | 3 | 1 | 2 | 88 | 1-Dec-15  | 2 |   |   |   |   |
| 39 | 2 | 3 | 1 | 2 | 88 | 1-Dec-15  | 2 |   |   |   |   |
| 10 | 2 | 3 | 1 | 2 | 88 | 1-Dec-15  | 2 |   |   |   |   |
| 15 | 2 | 3 | 1 | 2 | 88 | 30-Nov-15 | 2 |   |   |   |   |
| 20 | 2 | 3 | 1 | 2 | 88 | 30-Nov-15 | 2 |   |   |   |   |
| 20 | 2 | 3 | 1 | 2 | 88 | 30-Nov-15 | 2 |   |   |   |   |
| 45 | 2 | 3 | 1 | 2 | 88 | 30-Nov-15 | 2 |   |   |   |   |
| 18 | 2 | 3 | 1 | 2 | 88 | 30-Nov-15 | 2 |   |   |   |   |
| 25 | 2 | 3 | 1 | 2 | 88 | 30-Nov-15 | 2 |   |   |   |   |
| 15 | 2 | 3 | 1 | 2 | 88 | 30-Nov-15 | 2 |   |   |   |   |
| 50 | 2 | 3 | 1 | 2 | 88 | 30-Nov-15 | 2 |   |   |   |   |
| 9  | 2 | 3 | 1 | 2 | 88 | 30-Nov-15 | 2 |   |   |   |   |
| 10 | 2 | 3 | 1 | 2 | 88 | 30-Nov-15 | 2 |   |   |   |   |
| 30 | 2 | 3 | 1 | 2 | 88 | 30-Nov-15 | 2 |   |   |   |   |
| 47 | 2 | 3 | 1 | 2 | 88 | 30-Nov-15 | 2 |   |   |   |   |
| 30 | 2 | 3 | 1 | 2 | 88 | 24-Nov-15 | 2 |   |   |   |   |
| 2  | 2 | 3 | 1 | 2 | 88 | 24-Nov-15 |   |   |   |   |   |
| 15 | 2 | 3 | 1 | 2 | 88 | 5-Oct-15  | 2 |   |   |   |   |
| 10 | 2 | 3 | 1 | 2 | 88 | 5-Oct-15  | 2 |   |   |   |   |
| 25 | 2 | 3 | 1 | 2 | 88 | 5-Oct-15  | 2 |   |   |   |   |
| 40 | 2 | 3 | 1 | 2 | 88 | 5-Oct-15  | 1 | 2 | 2 | 1 | 2 |
| 37 | 2 | 3 | 1 | 2 | 88 | 5-Oct-15  | 2 |   |   |   |   |
| 44 | 1 | 3 | 1 | 2 | 88 | 5-Oct-15  | 1 | 2 | 1 |   |   |
| 55 | 2 | 3 | 1 | 2 | 88 | 5-Oct-15  | 1 | 2 | 2 | 1 | 2 |
| 30 | 2 | 3 | 1 | 2 | 88 | 29-Sep-15 | 2 |   |   |   |   |
| 50 | 2 | 3 | 1 | 2 | 88 | 29-Sep-15 | 2 |   |   |   |   |
| 10 | 2 | 3 | 1 | 2 | 88 | 29-Sep-15 | 1 | 2 | 2 | 1 |   |
| 20 | 2 | 3 | 1 | 2 | 88 | 29-Sep-15 | 2 |   |   |   |   |
| 21 | 2 | 3 | 1 | 2 | 88 | 29-Sep-15 | 2 |   |   |   |   |
| 44 | 2 | 3 | 1 | 2 | 88 | 29-Sep-15 | 1 | 2 | 2 | 1 | 2 |
| 4  | 2 | 3 | 1 | 2 | 88 | 29-Sep-15 | 1 | 2 | 2 | 1 | 2 |
| 21 | 2 | 3 | 1 | 2 | 88 | 29-Sep-15 | 1 | 2 | 2 | 1 | 2 |
| 17 | 2 | 3 | 1 | 2 | 88 | 28-Sep-15 | 2 |   |   |   |   |

|    |   |   |   |   |    |           |   |   |   |   |   |
|----|---|---|---|---|----|-----------|---|---|---|---|---|
| 9  | 2 | 3 | 1 | 2 | 88 | 28-Sep-15 | 1 | 2 | 2 | 1 | 2 |
| 40 | 2 | 3 | 1 | 2 | 88 | 28-Sep-15 | 1 | 2 | 2 | 1 | 2 |
| 15 | 1 | 3 | 1 | 2 | 88 | 28-Sep-15 | 2 |   |   |   |   |
| 0  | 2 | 3 | 1 | 2 | 88 | 28-Sep-15 | 2 |   |   |   |   |
| 42 | 2 | 3 | 1 | 2 | 88 | 29-Sep-15 | 2 |   |   |   |   |
| 15 | 2 | 3 | 1 | 2 | 88 | 17-Nov-15 | 2 |   |   |   |   |
| 15 | 2 | 3 | 1 | 1 |    | 16-Nov-15 | 1 | 2 | 2 | 1 |   |
| 0  | 1 | 2 | 1 | 2 | 88 | 16-Nov-15 | 1 | 2 | 2 | 1 |   |
| 2  | 2 | 3 | 1 | 2 | 88 | 16-Nov-15 | 1 | 2 | 2 | 1 |   |
| 21 | 2 | 3 | 1 | 2 | 88 | 16-Nov-15 | 1 | 2 | 2 | 1 |   |
| 41 | 2 | 3 | 1 | 2 | 88 | 16-Nov-15 | 2 |   |   |   |   |
| 39 | 2 | 3 | 1 | 2 | 88 | 16-Nov-15 | 1 | 2 | 2 | 1 |   |
| 20 | 2 | 3 | 1 | 2 | 88 | 16-Nov-15 | 1 | 2 | 2 | 1 |   |
| 37 | 2 | 3 | 1 | 2 | 88 | 16-Nov-15 | 1 | 2 | 2 | 1 |   |
| 32 | 2 | 3 | 1 | 2 | 88 | 16-Nov-15 | 1 | 2 | 2 | 1 |   |
| 21 | 2 | 3 | 1 | 2 | 88 | 16-Nov-15 | 1 | 2 | 2 | 1 |   |
| 20 | 2 | 3 | 1 | 2 | 88 | 16-Nov-15 | 1 | 2 | 2 | 1 |   |
| 5  | 2 | 3 | 1 | 2 | 88 | 10-Nov-15 | 2 |   |   |   |   |
| 10 | 2 | 3 | 1 | 2 | 88 | 10-Nov-15 | 1 | 2 | 2 | 1 |   |
| 20 | 2 | 3 | 1 | 2 | 88 | 10-Nov-15 | 1 | 2 | 2 | 1 |   |
| 10 | 2 | 3 | 1 | 2 | 88 | 10-Nov-15 | 1 | 2 | 2 | 1 |   |
| 3  | 2 | 3 | 1 | 2 | 88 | 10-Nov-15 | 1 | 2 | 2 | 1 |   |
| 10 | 2 | 3 | 1 | 2 | 88 | 10-Nov-15 | 2 |   |   |   |   |
| 31 | 2 | 3 | 1 | 2 | 88 | 10-Nov-15 | 1 | 2 | 2 | 1 |   |
| 46 | 2 | 3 | 1 | 2 | 88 | 10-Nov-15 | 1 | 2 | 2 | 1 | 2 |
| 56 | 2 | 3 | 1 | 2 | 88 | 10-Nov-15 |   |   |   |   |   |
| 20 | 2 | 3 | 1 | 2 | 88 | 9-Nov-15  | 1 | 2 | 2 | 1 | 2 |
| 35 | 2 | 3 | 1 | 2 | 88 | 9-Nov-15  | 1 | 2 | 2 | 1 |   |
| 10 | 2 | 3 | 1 | 2 | 88 | 9-Nov-15  | 1 | 2 | 2 | 1 |   |
| 20 | 2 | 3 | 1 | 2 | 88 | 9-Nov-15  | 1 | 2 | 2 | 1 | 2 |
| 0  | 2 | 3 | 1 | 2 | 88 | 9-Nov-15  | 1 | 2 | 2 | 1 | 2 |
| 33 | 2 | 3 | 1 | 2 | 88 | 9-Nov-15  | 2 |   |   |   |   |
| 50 | 2 | 3 | 1 | 2 | 88 | 9-Nov-15  | 2 |   |   |   |   |
| 50 | 2 | 3 | 1 | 2 | 88 | 9-Nov-15  | 1 | 2 | 2 | 1 | 1 |
| 30 | 2 | 3 | 1 | 2 | 88 | 9-Nov-15  | 1 | 2 | 2 | 1 |   |
| 40 | 2 | 3 | 1 | 2 | 88 | 26-Oct-15 | 1 | 2 | 2 | 1 |   |
| 30 | 2 | 3 | 1 | 2 | 88 | 20-Oct-15 | 2 |   |   |   |   |
| 40 | 2 | 3 | 1 | 2 | 88 | 20-Oct-15 | 1 | 2 | 2 | 1 |   |
| 47 | 2 | 3 | 1 | 2 | 88 | 20-Oct-15 | 2 |   |   |   |   |
| 18 | 2 | 3 | 1 | 2 | 2  | 20-Oct-15 | 1 | 2 | 2 | 1 | 2 |
| 23 | 2 | 3 | 1 | 2 | 88 | 20-Oct-15 | 1 | 2 | 2 | 1 |   |
| 48 | 2 | 3 | 1 | 2 | 88 | 20-Oct-15 | 1 | 2 | 2 | 1 | 2 |
| 15 | 2 | 3 | 1 | 2 | 88 | 20-Oct-15 | 2 |   |   |   |   |
| 45 | 2 | 3 | 1 | 2 | 88 | 20-Oct-15 | 1 | 2 | 2 | 1 |   |
| 8  | 2 | 3 | 1 | 2 | 88 | 20-Oct-15 | 2 |   |   |   |   |
| 13 | 2 | 3 | 1 | 2 | 88 | 13-Oct-15 | 2 |   |   |   |   |
| 20 | 2 | 3 | 1 | 2 | 88 | 13-Oct-15 | 2 |   |   |   |   |

|    |   |   |   |   |    |           |   |   |   |   |   |  |
|----|---|---|---|---|----|-----------|---|---|---|---|---|--|
| 34 | 2 | 3 | 1 | 2 | 88 | 13-Oct-15 | 2 |   |   |   |   |  |
| 50 | 2 | 3 | 1 | 2 | 88 | 13-Oct-15 | 1 | 2 | 2 | 1 | 2 |  |
| 48 | 2 | 3 | 1 | 2 | 88 | 13-Oct-15 | 1 | 2 | 2 | 1 | 2 |  |
| 10 | 2 | 3 | 1 | 2 | 88 | 13-Oct-15 | 2 |   |   |   |   |  |
| 10 | 2 | 3 | 1 | 2 | 88 | 13-Oct-15 | 1 | 2 | 2 | 2 | 2 |  |
| 10 | 2 | 3 | 1 | 2 | 88 | 13-Oct-15 | 2 |   |   |   |   |  |
| 17 | 2 | 3 | 1 | 2 | 88 | 13-Oct-15 | 1 | 2 | 2 | 1 |   |  |
| 20 | 2 | 3 | 1 | 2 | 88 | 13-Oct-15 | 2 |   |   |   |   |  |
| 15 | 2 | 3 | 1 | 2 | 88 | 13-Oct-15 | 1 | 2 | 2 | 1 |   |  |
| 44 | 2 | 3 | 1 | 2 | 88 | 12-Oct-15 | 2 |   |   |   |   |  |
| 58 | 2 | 3 | 1 | 2 | 88 | 12-Oct-15 | 1 | 2 | 2 | 1 | 2 |  |
| 31 | 2 | 3 | 1 | 2 | 88 | 12-Oct-15 | 2 |   |   |   |   |  |
| 4  | 2 | 3 | 1 | 2 | 88 | 12-Oct-15 | 1 | 2 | 2 | 1 | 2 |  |
| 30 | 2 | 3 | 1 | 2 | 88 | 12-Oct-15 | 2 |   |   |   |   |  |
| 20 | 2 | 3 | 1 | 2 | 88 | 20-Oct-15 | 2 |   |   |   |   |  |
| 35 | 2 | 3 | 1 | 2 | 88 | 28-Sep-15 | 1 | 2 | 1 | 1 | 2 |  |
| 40 | 2 | 3 | 1 | 2 | 88 | 28-Sep-15 | 1 | 2 | 2 | 1 | 2 |  |
| 35 | 2 | 3 | 1 | 2 | 88 | 28-Sep-15 | 2 |   |   |   |   |  |
| 12 | 2 | 3 | 1 | 2 | 88 | 28-Sep-15 | 1 | 2 | 2 | 2 | 2 |  |
| 50 | 2 | 3 | 1 | 2 | 88 | 28-Sep-15 | 2 |   |   |   |   |  |
| 20 | 2 | 3 | 1 | 2 | 88 | 22-Sep-15 | 2 |   |   |   |   |  |
| 27 | 2 | 3 | 1 | 2 | 88 | 22-Sep-15 | 2 |   |   |   |   |  |
| 20 | 2 | 3 | 1 | 2 | 88 | 22-Sep-15 | 1 | 2 | 2 | 1 |   |  |
| 15 | 1 | 3 | 1 | 2 | 88 | 22-Sep-15 | 2 |   |   |   |   |  |
| 35 | 2 | 3 | 1 | 2 | 88 | 22-Sep-15 | 2 |   |   |   |   |  |
| 39 | 2 | 3 | 1 | 2 | 88 | 22-Sep-15 | 2 |   |   |   |   |  |
| 0  | 2 | 3 | 1 | 2 | 88 | 22-Sep-15 | 2 |   |   |   |   |  |
| 20 | 2 | 3 | 1 | 2 | 88 | 22-Sep-15 | 1 | 2 | 2 | 1 | 2 |  |
| 38 | 2 | 3 | 1 | 2 | 88 | 22-Sep-15 | 1 | 2 | 2 | 1 |   |  |
| 5  | 2 | 3 | 1 | 2 | 88 | 22-Sep-15 | 2 |   |   |   |   |  |
| 20 | 2 | 3 | 1 | 2 | 88 | 21-Sep-15 | 2 |   |   |   |   |  |
| 11 | 2 | 3 | 1 | 2 | 88 | 21-Sep-15 | 2 |   |   |   |   |  |
| 10 | 2 | 3 | 1 | 2 | 88 | 21-Sep-15 | 2 |   |   |   |   |  |
| 24 | 2 | 3 | 1 | 2 | 88 | 21-Sep-15 | 1 | 2 | 2 | 1 | 2 |  |
| 50 | 2 | 3 | 1 | 2 | 88 | 21-Sep-15 | 2 |   |   |   |   |  |
| 7  | 2 | 3 | 1 | 2 | 88 | 21-Sep-15 | 2 |   |   |   |   |  |
| 40 | 2 | 3 | 1 | 2 | 88 | 21-Sep-15 | 2 |   |   |   |   |  |
| 0  | 2 | 3 | 1 | 2 | 88 | 21-Sep-15 | 2 |   |   |   |   |  |
| 8  | 2 | 3 | 1 | 2 | 88 | 21-Sep-15 | 1 | 2 | 2 | 1 | 2 |  |
| 36 | 2 | 3 | 1 | 2 | 88 | 21-Sep-15 | 1 | 2 | 2 | 1 |   |  |
| 35 | 2 | 3 | 1 | 2 | 88 | 21-Sep-15 | 1 | 2 | 2 | 1 |   |  |
| 15 | 2 | 3 | 1 | 2 | 88 | 21-Sep-15 | 2 |   |   |   |   |  |
| 50 | 2 | 3 | 1 | 2 | 88 | 21-Sep-15 | 2 |   |   |   |   |  |
| 25 | 2 | 3 | 1 | 2 | 88 | 15-Sep-15 | 2 |   |   |   |   |  |
| 53 | 2 | 3 | 1 | 2 | 88 | 14-Sep-15 | 2 |   |   |   |   |  |
| 45 | 2 | 3 | 1 | 2 | 88 | 14-Sep-15 | 1 | 2 | 2 | 1 |   |  |

|    |   |   |   |   |    |           |   |   |   |   |   |
|----|---|---|---|---|----|-----------|---|---|---|---|---|
| 35 | 2 | 3 | 1 | 2 | 88 | 14-Sep-15 | 2 |   |   |   |   |
| 20 | 2 | 3 | 1 | 2 | 88 | 14-Sep-15 | 1 | 2 | 2 | 1 |   |
| 10 | 2 | 3 | 1 | 2 | 88 | 14-Sep-14 | 1 | 2 | 2 | 1 |   |
| 0  | 2 | 3 | 1 | 2 | 88 | 14-Sep-15 | 2 |   |   |   |   |
| 52 | 2 | 3 | 1 | 2 | 88 | 3-Nov-15  | 1 | 2 | 2 | 1 | 2 |
| 28 | 2 | 3 | 1 | 2 | 88 | 3-Nov-15  | 1 | 2 | 2 | 1 | 2 |
| 37 | 2 | 3 | 1 | 2 | 88 | 3-Nov-15  | 1 | 2 | 2 | 1 | 2 |
| 55 | 2 | 3 | 1 | 2 | 88 | 3-Nov-15  | 1 | 2 | 2 | 1 | 2 |
| 35 | 2 | 3 | 1 | 2 | 88 | 3-Nov-15  | 1 | 2 | 2 | 1 | 2 |
| 5  | 2 | 3 | 1 | 2 | 88 | 2-Nov-15  | 2 |   |   |   |   |
| 22 | 2 | 3 | 1 | 2 | 88 | 3-Nov-15  | 2 |   |   |   |   |
| 35 | 2 | 3 | 1 | 2 | 88 | 2-Nov-15  | 1 | 2 | 2 | 1 | 2 |
| 20 | 2 | 3 | 1 | 2 | 88 | 2-Nov-15  | 2 |   |   |   |   |
| 0  | 2 | 3 | 1 | 2 | 88 | 2-Nov-15  | 2 |   |   |   |   |
| 17 | 2 | 3 | 1 | 2 | 88 | 2-Nov-15  | 2 |   |   |   |   |
| 46 | 2 | 3 | 1 | 2 | 88 | 2-Nov-15  | 1 | 2 | 2 | 1 | 2 |
| 52 | 2 | 3 | 1 | 2 | 88 | 2-Nov-15  | 1 | 2 | 2 | 1 | 2 |
| 17 | 2 | 3 | 1 | 2 | 88 | 27-Oct-15 | 1 | 2 | 2 | 1 | 2 |
| 15 | 2 | 3 | 1 | 2 | 88 | 27-Oct-15 | 1 | 2 | 2 | 1 | 2 |
| 50 | 2 | 3 | 1 | 2 | 88 | 27-Oct-15 | 1 | 2 | 2 | 1 | 2 |
| 30 | 2 | 3 | 1 | 2 | 88 | 27-Oct-15 | 2 |   |   |   |   |
| 50 | 2 | 3 | 1 | 2 | 88 | 27-Oct-15 | 2 |   |   |   |   |
| 20 | 2 | 3 | 1 | 2 | 88 | 27-Oct-15 | 2 |   |   |   |   |
| 23 | 2 | 3 | 1 | 2 | 88 | 27-Oct-15 | 2 |   |   |   |   |
| 37 | 2 | 3 | 1 | 2 | 88 | 27-Oct-15 | 2 |   |   |   |   |
| 10 | 2 | 3 | 1 | 2 | 88 | 27-Oct-15 | 1 | 2 | 2 | 1 | 2 |
| 55 | 2 | 3 | 1 | 2 | 88 | 26-Oct-15 | 2 |   |   |   |   |
| 4  | 2 | 3 | 1 | 2 | 88 | 26-Oct-15 | 2 |   |   |   |   |
| 40 | 2 | 3 | 1 | 2 | 88 | 26-Oct-15 | 2 |   |   |   |   |
| 20 | 2 | 3 | 1 | 2 | 88 | 26-Oct-15 | 2 |   |   |   |   |
| 36 | 2 | 3 | 1 | 2 | 88 | 26-Oct-15 | 2 |   |   |   |   |
| 35 | 2 | 3 | 1 | 2 | 88 | 26-Oct-15 | 1 | 2 | 2 | 1 |   |
| 10 | 2 | 3 | 1 | 2 | 88 | 26-Oct-15 | 1 | 2 | 2 | 1 |   |
| 30 | 2 | 3 | 1 | 2 | 88 | 26-Oct-15 | 2 |   |   |   |   |
| 1  | 2 | 3 | 1 | 2 | 88 | 26-Oct-15 | 1 | 2 | 2 | 1 |   |
| 46 | 2 | 3 | 1 | 2 | 88 | 24-Nov-15 |   |   |   |   |   |
| 0  | 2 | 3 | 1 | 2 | 88 | 24-Nov-15 |   |   |   |   |   |
| 27 | 2 | 3 | 1 | 2 | 88 | 24-Nov-15 |   |   |   |   |   |
| 18 | 2 | 3 | 1 | 2 | 88 | 24-Nov-15 |   |   |   |   |   |
| 40 | 2 | 3 | 1 | 2 | 88 | 24-Nov-15 |   |   |   |   |   |
| 50 | 2 | 3 | 1 | 2 | 88 | 24-Nov-15 |   |   |   |   |   |
| 10 | 2 | 3 | 1 | 2 | 88 | 24-Nov-15 | 2 |   |   |   |   |
| 10 | 2 | 3 | 1 | 2 | 88 | 24-Nov-15 | 2 |   |   |   |   |
| 30 | 2 | 3 | 1 | 2 | 88 | 24-Nov-15 | 1 | 2 | 2 | 1 |   |
| 33 | 2 | 3 | 1 | 2 | 88 | 24-Nov-15 | 2 |   |   |   |   |
| 32 | 2 | 3 | 1 | 2 | 88 | 23-Nov-15 | 1 | 2 | 2 | 1 |   |
| 39 | 2 | 3 | 1 | 2 | 88 | 23-Nov-15 | 1 | 2 | 2 | 1 |   |

|    |   |   |   |   |    |           |   |   |   |   |
|----|---|---|---|---|----|-----------|---|---|---|---|
| 15 | 2 | 3 | 1 | 2 | 88 | 23-Nov-15 | 1 | 2 | 2 | 1 |
| 10 | 2 | 3 | 1 | 2 | 88 | 23-Nov-15 | 1 | 2 | 2 | 1 |
| 22 | 2 | 3 | 1 | 2 | 88 | 23-Nov-15 | 1 | 2 | 2 | 1 |
| 26 | 2 | 3 | 1 | 2 | 88 | 23-Nov-15 | 1 | 2 | 2 | 1 |
| 40 | 2 | 3 | 1 | 2 | 88 | 23-Nov-15 | 1 | 2 | 2 | 1 |
| 3  | 2 | 3 | 1 | 2 | 88 | 23-Nov-15 | 1 | 2 | 2 | 1 |
| 20 | 2 | 3 | 1 | 2 | 88 | 23-Nov-15 | 1 | 2 | 2 | 1 |
| 44 | 2 | 3 | 1 | 2 | 88 | 23-Nov-15 | 1 | 2 | 2 | 1 |
| 26 | 2 | 3 | 1 | 2 | 88 | 23-Nov-15 | 1 | 2 | 2 | 1 |
| 45 | 2 | 3 | 1 | 2 | 88 | 23-Nov-15 | 1 | 2 | 2 | 1 |
| 0  | 2 | 3 | 1 | 2 | 88 | 17-Nov-15 | 1 | 2 | 2 | 1 |
| 49 | 2 | 3 | 1 | 2 | 88 | 17-Nov-15 | 2 |   |   |   |
| 9  | 2 | 3 | 1 | 2 | 88 | 17-Nov-15 | 2 |   |   |   |
| 57 | 2 | 3 | 1 | 2 | 88 | 17-Nov-15 | 1 | 2 | 2 | 1 |
| 37 | 2 | 3 | 1 | 2 | 88 | 17-Nov-15 | 2 |   |   |   |
| 18 | 2 | 3 | 1 | 2 | 88 | 17-Nov-15 | 1 | 2 | 2 | 1 |
| 15 | 2 | 3 | 1 | 2 | 88 | 17-Nov-15 | 1 | 2 | 2 | 1 |
| 59 | 2 | 3 | 1 | 2 | 88 | 17-Oct-15 | 2 |   |   |   |



| q33d28 | q34hhd28 | q34mmd28 | q36d28    | q37d28    | asexpfd28 | gmcypfd28 | asexpmd28 | gmcypmd28 |
|--------|----------|----------|-----------|-----------|-----------|-----------|-----------|-----------|
| 2      | 7        | 43       | 17-Nov-14 |           | 2         | 2         | 2         | 2         |
|        | 11       | 17       | 17-Nov-14 |           | 2         | 2         | 2         | 2         |
|        | 7        | 22       | 17-Nov-14 |           | 2         | 2         | 2         | 2         |
|        | 8        | 40       | 17-Nov-14 |           | 2         | 2         | 2         | 2         |
|        | 10       | 10       | 17-Nov-14 |           | 2         | 2         | 2         | 2         |
|        | 7        | 50       | 18-Nov-14 |           | 2         | 2         | 2         | 2         |
|        | 8        | 22       | 18-Nov-14 |           | 2         | 2         | 2         | 2         |
|        | 9        | 25       | 18-Nov-14 |           | 2         | 2         | 2         | 2         |
|        | 7        | 30       | 18-Nov-14 |           | 2         | 2         | 2         | 2         |
|        | 6        | 58       | 18-Nov-14 | 18-Nov-14 | 2         | 2         | 2         | 2         |
|        | 3        | 55       | 25-Nov-14 |           | 2         | 2         | 2         | 2         |
|        | 3        | 18       | 25-Nov-14 |           | 2         | 2         | 2         | 2         |
|        | 2        | 54       | 25-Nov-14 |           | 2         | 2         | 2         | 2         |
|        | 6        | 41       | 1-Dec-14  |           | 2         | 2         | 2         | 2         |
|        | 7        | 44       | 1-Dec-14  |           | 2         | 2         | 2         | 2         |
|        | 7        | 7        | 1-Dec-14  |           | 2         | 2         | 2         | 2         |
|        | 6        | 44       | 2-Dec-14  |           | 2         | 2         | 2         | 2         |
|        | 6        | 41       | 2-Dec-14  |           | 2         | 2         | 2         | 2         |
|        | 7        | 23       | 2-Dec-14  |           | 2         | 2         | 2         | 2         |
|        | 6        | 53       | 2-Dec-14  |           | 2         | 2         | 2         | 2         |
|        | 8        | 30       | 2-Dec-14  |           | 2         | 2         | 2         | 2         |
|        | 7        | 53       | 2-Dec-14  |           | 2         | 2         | 2         | 2         |
|        | 7        | 43       | 2-Dec-14  |           | 2         | 2         | 2         | 2         |
|        | 7        | 2        | 8-Dec-14  |           | 2         | 2         | 2         | 2         |
|        | 7        | 25       | 8-Dec-14  |           | 2         | 2         | 2         | 2         |
|        | 9        | 10       | 8-Dec-14  |           | 2         | 2         | 2         | 2         |
|        | 6        | 37       | 8-Dec-14  |           | 2         | 2         | 2         | 2         |
|        | 6        | 18       | 8-Dec-14  |           | 2         | 2         | 2         | 2         |
|        | 2        | 41       | 9-Dec-14  |           | 2         | 2         | 2         | 2         |
|        | 6        | 50       | 9-Dec-14  |           | 2         | 2         | 2         | 2         |
|        | 7        | 9        | 9-Dec-14  |           | 2         | 2         | 2         | 2         |
|        | 7        | 43       | 9-Dec-14  |           | 2         | 2         | 2         | 2         |
|        | 2        | 52       | 15-Dec-14 |           | 2         | 2         | 2         | 2         |
|        |          |          | 15-Dec-14 |           | 2         | 2         | 2         | 2         |
|        | 7        | 51       | 15-Dec-14 |           | 2         | 2         | 2         | 2         |
|        | 7        | 26       | 15-Dec-14 |           | 2         | 2         | 2         | 2         |
|        | 8        | 3        | 22-Dec-14 |           | 2         | 2         | 2         | 2         |
|        | 8        | 33       | 2-Dec-14  |           | 2         | 2         | 2         | 2         |
|        | 7        | 20       | 29-Dec-14 |           | 2         | 2         | 2         | 2         |
|        | 8        | 42       | 20-Dec-14 |           | 2         | 2         | 2         | 2         |
|        | 8        | 45       | 5-Jan-15  |           | 2         | 2         | 2         | 2         |
|        | 9        | 51       | 6-Jan-15  |           | 2         | 2         | 2         | 2         |
|        | 9        | 20       | 12-Jan-15 |           |           |           |           |           |
|        | 9        | 12       | 13-Jan-15 |           | 2         | 2         | 2         | 2         |
|        | 7        | 30       | 14-Jan-15 |           | 2         | 2         | 2         | 2         |

|    |    |           |   |   |   |
|----|----|-----------|---|---|---|
| 3  | 6  |           |   |   |   |
| 9  | 41 | 15-Jan-15 | 2 | 2 | 2 |
| 10 | 33 | 19-Jan-15 | 2 | 2 | 2 |
| 8  | 42 | 19-Oct-15 | 2 | 2 | 2 |
| 8  | 0  | 19-Jan-15 | 2 | 2 | 2 |
| 9  | 38 |           | 2 | 2 | 2 |
| 9  | 5  | 19-Jan-15 | 2 | 2 | 2 |
| 8  | 41 | 19-Jan-15 | 2 | 2 | 2 |
| 11 | 42 | 20-Jan-15 | 2 | 2 | 2 |
| 8  | 49 |           | 2 | 2 | 2 |
| 8  | 48 |           |   |   |   |
| 9  | 18 |           |   |   |   |
| 3  | 29 |           |   |   |   |
| 1  | 42 |           |   |   |   |
| 9  | 29 |           |   |   |   |
| 9  | 19 |           |   |   |   |
| 8  | 47 |           |   |   |   |
| 7  | 48 |           |   |   |   |
| 8  | 13 |           |   |   |   |
| 9  | 26 |           |   |   |   |
| 7  | 51 |           |   |   |   |
| 8  | 54 | 9-Feb-15  | 2 | 2 | 2 |
| 6  | 55 | 9-Feb-15  | 2 | 2 | 2 |
| 6  | 46 | 9-Feb-15  | 2 | 2 | 2 |
| 9  | 45 | 17-Feb-15 | 2 | 2 | 2 |
| 7  | 23 | 23-Feb-15 | 2 | 2 | 2 |
| 3  | 41 | 23-Feb-15 | 2 | 2 | 2 |
| 3  | 10 | 23-Feb-15 | 2 | 2 | 2 |
| 8  | 52 |           |   |   |   |
| 7  | 43 |           |   |   |   |
| 11 | 10 | 17-Feb-15 | 2 | 2 | 2 |
| 8  | 50 | 13-Jan-15 | 2 | 2 | 2 |
| 1  | 31 | 12-Oct-15 | 2 | 2 | 2 |
| 8  | 15 | 12-Oct-15 | 2 | 2 | 2 |
| 6  | 21 | 12-Oct-15 | 2 | 2 | 2 |
| 7  | 21 | 12-Oct-15 | 2 | 2 | 2 |
| 7  | 13 | 6-Oct-15  | 2 | 2 | 2 |
| 8  | 16 | 6-Oct-15  | 2 | 2 | 2 |
| 7  | 37 | 6-Oct-15  | 2 | 2 | 2 |
| 6  | 47 | 6-Oct-15  | 2 | 2 | 2 |
| 6  | 30 | 6-Oct-15  | 2 | 2 | 2 |
| 8  | 59 | 6-Oct-15  | 2 | 2 | 2 |
| 9  | 11 | 6-Oct-15  | 2 | 2 | 2 |
| 6  | 53 | 6-Oct-15  | 2 | 2 | 2 |
| 8  | 20 | 6-Oct-15  | 2 | 2 | 2 |

|    |    |           |   |   |   |   |
|----|----|-----------|---|---|---|---|
|    |    | 5-Oct-15  | 2 | 2 | 2 | 2 |
| 7  | 43 | 5-Oct-15  | 2 | 2 | 2 | 2 |
| 6  | 51 | 5-Oct-15  | 2 | 2 | 2 | 2 |
|    |    | 5-Oct-15  | 2 | 2 | 2 | 2 |
| 11 | 20 | 1-Dec-15  | 2 | 2 | 2 | 2 |
| 6  | 51 | 1-Dec-15  | 2 | 2 | 2 | 2 |
| 7  | 32 | 1-Dec-15  | 2 | 2 | 2 | 2 |
| 7  | 46 | 1-Dec-15  | 2 | 2 | 2 | 2 |
| 6  | 24 | 1-Dec-15  | 2 | 2 | 2 | 2 |
| 7  | 6  | 1-Dec-15  | 2 | 2 | 2 | 2 |
| 7  | 16 | 1-Dec-15  | 2 | 2 | 2 | 2 |
| 7  | 18 | 1-Dec-15  | 2 | 2 | 2 | 2 |
| 7  | 48 | 1-Dec-15  | 2 | 2 | 2 | 2 |
| 8  | 58 | 1-Dec-15  | 2 | 2 | 2 | 2 |
| 6  | 38 | 1-Dec-15  | 2 | 2 | 2 | 2 |
| 6  | 46 | 1-Dec-15  | 2 | 2 | 2 | 2 |
| 2  | 20 | 1-Dec-15  | 2 | 2 | 2 | 2 |
| 10 | 24 | 30-Nov-15 | 2 | 2 | 2 | 2 |
| 7  | 26 | 30-Nov-15 | 2 | 2 | 2 | 2 |
| 6  | 27 | 30-Nov-15 | 2 | 2 | 2 | 2 |
| 7  | 51 | 30-Nov-15 | 2 | 2 | 2 | 2 |
| 6  | 24 | 30-Nov-15 | 2 | 2 | 2 | 2 |
| 7  | 30 | 30-Nov-15 | 2 | 2 | 2 | 2 |
| 8  | 22 | 30-Nov-15 | 2 | 2 | 2 | 2 |
| 6  | 55 | 30-Nov-15 | 2 | 2 | 2 | 2 |
| 7  | 15 | 30-Nov-15 | 2 | 2 | 2 | 2 |
| 2  | 19 | 30-Nov-15 | 2 | 2 | 2 | 2 |
| 8  | 41 | 30-Nov-15 | 2 | 2 | 2 | 2 |
| 8  | 56 | 30-Nov-15 | 2 | 2 | 2 | 2 |
| 9  | 41 | 24-Nov-15 | 2 | 2 | 2 | 2 |
| 7  | 7  | 24-Nov-15 | 2 | 2 | 2 | 2 |
| 6  | 25 | 5-Oct-15  | 2 | 2 | 2 | 2 |
| 7  | 21 | 5-Oct-15  | 2 | 2 | 2 | 2 |
| 8  | 35 | 5-Oct-15  | 2 | 2 | 2 | 2 |
| 6  | 46 | 5-Oct-15  | 2 | 2 | 2 | 2 |
| 7  | 45 | 5-Oct-15  | 2 | 2 | 2 | 2 |
| 8  | 55 | 5-Oct-15  | 2 | 2 | 2 | 2 |
| 1  | 3  | 5-Oct-15  | 2 | 2 | 2 | 2 |
| 6  | 42 | 29-Sep-15 | 2 | 2 | 2 | 2 |
| 6  | 59 | 29-Sep-15 | 2 | 2 | 2 | 2 |
| 7  | 23 | 29-Sep-15 | 2 | 2 | 2 | 2 |
| 12 | 35 | 29-Sep-15 | 2 | 2 | 2 | 2 |
| 7  | 29 | 29-Sep-15 | 2 | 2 | 2 | 2 |
| 6  | 55 | 29-Sep-15 | 2 | 2 | 2 | 2 |
| 8  | 13 | 29-Sep-15 | 2 | 2 | 2 | 2 |
| 6  | 29 | 29-Sep-15 | 2 | 2 | 2 | 2 |
| 8  | 28 | 28-Sep-15 | 2 | 2 | 2 | 2 |

|    |    |           |   |   |   |   |
|----|----|-----------|---|---|---|---|
| 7  | 19 | 28-Sep-15 | 2 | 2 | 2 | 2 |
| 6  | 50 | 28-Sep-15 | 2 | 2 | 2 | 2 |
| 6  | 23 | 28-Sep-15 | 2 | 2 | 2 | 2 |
| 8  | 14 | 28-Sep-15 | 2 | 2 | 2 | 2 |
| 7  | 52 | 29-Sep-15 | 2 | 2 | 2 | 2 |
| 6  | 29 | 17-Nov-15 | 2 | 2 | 2 | 2 |
| 8  | 29 | 16-Nov-15 | 2 | 2 | 2 | 2 |
| 7  | 8  | 16-Nov-15 | 2 | 2 | 2 | 2 |
| 8  | 14 | 16-Nov-15 | 2 | 2 | 2 | 2 |
| 7  | 30 | 16-Nov-15 | 2 | 2 | 2 | 2 |
| 7  | 50 | 16-Nov-15 | 2 | 2 | 2 | 2 |
| 6  | 47 | 16-Nov-15 | 2 | 2 | 2 | 2 |
| 6  | 30 | 16-Nov-15 | 2 | 2 | 2 | 2 |
| 6  | 50 | 16-Nov-15 | 2 | 2 | 2 | 2 |
| 8  | 43 | 16-Nov-15 | 2 | 2 | 2 | 2 |
| 7  | 33 | 16-Nov-15 | 2 | 2 | 2 | 2 |
| 6  | 29 | 10-Nov-15 | 2 | 2 | 2 | 2 |
| 7  | 18 | 10-Nov-15 | 2 | 2 | 2 | 2 |
| 9  | 20 | 10-Nov-15 | 2 | 2 | 2 | 2 |
| 6  | 33 | 10-Nov-15 | 2 | 2 | 2 | 2 |
| 5  | 23 | 10-Nov-15 | 2 | 2 | 2 | 2 |
| 10 | 10 | 10-Nov-15 | 1 | 2 | 2 | 2 |
| 7  | 18 | 10-Nov-15 | 2 | 2 | 2 | 2 |
| 7  | 42 | 10-Nov-15 | 1 | 2 | 2 | 2 |
| 6  | 55 | 10-Nov-15 | 2 | 2 | 2 | 2 |
| 8  | 4  | 10-Nov-15 | 2 | 2 | 2 | 2 |
| 6  | 28 | 9-Nov-15  | 2 | 2 | 2 | 2 |
| 10 | 47 | 9-Nov-15  | 2 | 2 | 2 | 2 |
| 9  | 20 | 9-Nov-15  | 2 | 2 | 2 | 2 |
| 7  | 27 | 9-Nov-15  | 2 | 2 | 2 | 2 |
| 7  | 7  | 9-Nov-15  | 2 | 2 | 2 | 2 |
| 6  | 42 | 9-Nov-15  | 2 | 2 | 2 | 2 |
| 10 | 2  | 9-Nov-15  | 2 | 2 | 2 | 2 |
| 6  | 56 | 9-Nov-15  | 2 | 2 | 2 | 2 |
| 4  | 39 | 9-Nov-15  | 2 | 2 | 2 | 2 |
| 7  | 50 | 26-Oct-15 | 2 | 2 | 2 | 2 |
| 6  | 38 | 20-Oct-15 | 2 | 2 | 2 | 2 |
| 7  | 51 | 20-Oct-15 | 2 | 2 | 2 | 2 |
| 6  | 55 | 20-Oct-15 | 2 | 2 | 2 | 2 |
| 7  | 26 | 20-Oct-15 | 2 | 2 | 2 | 2 |
| 8  | 34 | 20-Oct-15 | 2 | 2 | 2 | 2 |
| 8  | 0  | 20-Oct-15 | 2 | 2 | 2 | 2 |
| 7  | 26 | 20-Oct-15 | 2 | 2 | 2 | 2 |
| 6  | 55 | 20-Oct-15 | 2 | 2 | 2 | 2 |
| 6  | 18 | 20-Oct-15 | 2 | 2 | 2 | 2 |
| 7  | 22 | 13-Oct-15 | 2 | 2 | 2 | 2 |
| 6  | 31 | 13-Oct-15 | 2 | 2 | 2 | 2 |

|   |    |    |           |   |   |   |   |
|---|----|----|-----------|---|---|---|---|
| 1 | 6  | 46 | 13-Oct-15 | 2 | 2 | 2 | 2 |
|   | 8  | 5  | 13-Oct-15 | 2 | 2 | 2 | 2 |
|   | 6  | 57 | 13-Oct-15 | 2 | 2 | 2 | 2 |
|   | 6  | 20 | 13-Oct-15 | 2 | 2 | 2 | 2 |
|   | 6  | 21 | 13-Oct-15 | 2 | 2 | 2 | 2 |
|   | 3  | 23 | 13-Oct-15 | 2 | 2 | 2 | 2 |
|   | 7  | 28 | 13-Oct-15 | 2 | 2 | 2 | 2 |
|   | 7  | 29 | 13-Oct-15 | 2 | 2 | 2 | 2 |
|   | 7  | 24 | 13-Oct-15 | 2 | 2 | 2 | 2 |
|   | 6  | 53 | 12-Oct-15 | 2 | 2 | 2 | 2 |
|   | 8  | 8  | 12-Oct-15 | 2 | 2 | 2 | 2 |
|   | 7  | 43 | 12-Oct-15 | 2 | 2 | 2 | 2 |
|   | 7  | 14 | 12-Oct-15 | 2 | 2 | 2 | 2 |
|   | 6  | 39 | 12-Oct-15 | 2 | 2 | 2 | 2 |
| 1 | 11 | 33 | 20-Oct-15 | 2 | 2 | 2 | 2 |
|   | 7  | 47 | 28-Sep-15 | 2 | 2 | 2 | 2 |
|   | 8  | 48 | 28-Sep-15 | 2 | 2 | 2 | 2 |
|   | 7  | 47 | 28-Sep-15 | 2 | 2 | 2 | 2 |
|   | 7  | 22 | 28-Sep-15 | 2 | 2 | 2 | 2 |
|   | 11 | 2  | 28-Sep-15 | 2 | 2 | 2 | 2 |
|   | 8  | 33 | 22-Sep-15 | 2 | 2 | 2 | 2 |
|   | 6  | 42 | 22-Sep-15 | 2 | 2 | 2 | 2 |
|   | 7  | 32 | 22-Sep-15 | 2 | 2 | 2 | 2 |
|   | 7  | 27 | 22-Sep-15 | 2 | 2 | 2 | 2 |
|   | 8  | 45 | 22-Sep-15 | 2 | 2 | 2 | 2 |
|   | 7  | 48 | 22-Sep-15 | 2 | 2 | 2 | 2 |
|   | 8  | 9  | 22-Sep-15 | 2 | 2 | 2 | 2 |
|   | 6  | 32 | 22-Sep-15 | 2 | 2 | 2 | 2 |
|   | 7  | 50 | 22-Sep-15 | 2 | 2 | 2 | 2 |
|   | 6  | 15 | 22-Sep-15 | 2 | 2 | 2 | 2 |
|   | 11 | 33 | 21-Sep-15 | 2 | 2 | 2 | 2 |
|   | 10 | 23 | 21-Sep-15 | 2 | 2 | 2 | 2 |
|   | 8  | 20 | 21-Sep-15 | 2 | 2 | 2 | 2 |
|   | 8  | 36 | 21-Sep-15 | 2 | 2 | 2 | 2 |
|   | 9  | 0  | 21-Sep-15 | 2 | 2 | 2 | 2 |
|   | 8  | 15 | 21-Sep-15 | 2 | 2 | 2 | 2 |
|   | 9  | 50 | 21-Sep-15 | 2 | 2 | 2 | 2 |
|   | 11 | 12 | 21-Sep-15 | 2 | 2 | 2 | 2 |
|   | 9  | 17 | 21-Sep-15 | 2 | 2 | 2 | 2 |
|   | 7  | 47 | 21-Sep-15 | 2 | 2 | 2 | 2 |
|   | 8  | 46 | 21-Sep-15 | 2 | 2 | 2 | 2 |
|   | 9  | 26 | 21-Sep-15 | 2 | 2 | 2 | 2 |
|   | 8  | 59 | 21-Sep-15 | 2 | 2 | 2 | 2 |
|   | 7  | 32 | 15-Sep-15 | 2 | 2 | 2 | 2 |
|   |    |    | 15-Sep-15 | 2 | 2 | 2 | 2 |
|   | 9  | 8  | 14-Sep-15 | 2 | 2 | 2 | 2 |
|   | 9  | 51 | 14-Sep-15 | 2 | 2 | 2 | 2 |

|    |    |           |   |   |   |   |
|----|----|-----------|---|---|---|---|
| 1  | 43 | 14-Sep-15 | 2 | 2 | 2 | 2 |
| 1  | 35 | 14-Sep-15 | 2 | 2 | 2 | 2 |
| 9  | 23 | 14-Sep-15 | 2 | 2 | 2 | 2 |
| 11 | 8  | 14-Sep-15 | 2 | 2 | 2 | 2 |
| 7  | 58 | 3-Nov-15  | 2 | 2 | 2 | 2 |
| 8  | 34 | 3-Nov-15  | 2 | 2 | 2 | 2 |
| 6  | 45 | 3-Nov-15  | 2 | 2 | 2 | 2 |
| 2  | 0  | 3-Nov-15  | 2 | 2 | 2 | 2 |
| 8  | 40 | 3-Nov-15  | 2 | 2 | 2 | 2 |
| 1  | 15 | 2-Nov-15  | 2 | 2 | 2 | 2 |
| 6  | 30 | 3-Nov-15  | 2 | 2 | 2 | 2 |
| 7  | 40 | 2-Nov-15  | 2 | 2 | 2 | 2 |
| 7  | 31 | 2-Nov-15  | 2 | 2 | 2 | 2 |
| 7  | 8  | 2-Nov-15  | 2 | 2 | 2 | 2 |
| 7  | 26 | 2-Nov-15  | 2 | 2 | 2 | 2 |
| 8  | 52 | 2-Nov-15  | 2 | 2 | 2 | 2 |
| 7  | 58 | 2-Nov-15  | 2 | 2 | 2 | 2 |
| 8  | 25 | 27-Oct-15 | 2 | 2 | 2 | 2 |
| 6  | 22 | 27-Oct-15 | 2 | 2 | 2 | 2 |
| 7  | 59 | 27-Oct-15 | 2 | 2 | 2 | 2 |
| 7  | 38 | 27-Oct-15 | 2 | 2 | 2 | 2 |
| 6  | 58 | 27-Oct-15 | 2 | 2 | 2 | 2 |
| 6  | 31 | 27-Oct-15 | 2 | 2 | 2 | 2 |
| 7  | 35 | 27-Oct-15 | 2 | 2 | 2 | 2 |
| 6  | 50 | 27-Oct-15 | 2 | 2 | 2 | 2 |
| 7  | 20 | 27-Oct-15 | 2 | 2 | 2 | 2 |
| 8  | 4  | 26-Oct-15 | 2 | 2 | 2 | 2 |
| 7  | 15 | 26-Oct-15 | 2 | 2 | 2 | 2 |
| 7  | 52 | 26-Oct-15 | 2 | 2 | 2 | 2 |
| 8  | 32 | 26-Oct-15 | 2 | 2 | 2 | 2 |
| 6  | 45 | 26-Oct-15 | 2 | 2 | 2 | 2 |
| 2  | 48 | 26-Oct-15 | 2 | 2 | 2 | 2 |
| 3  | 21 | 26-Oct-15 | 2 | 2 | 2 | 2 |
| 6  | 43 | 26-Oct-15 | 2 | 2 | 2 | 2 |
| 8  | 13 | 26-Oct-15 | 2 | 2 | 2 | 2 |
| 6  | 52 | 24-Nov-15 | 2 | 2 | 2 | 2 |
| 8  | 5  | 24-Nov-15 | 2 | 2 | 2 | 2 |
| 6  | 35 | 24-Nov-15 | 2 | 2 | 2 | 2 |
| 7  | 25 | 24-Nov-15 | 2 | 2 | 2 | 2 |
| 7  | 46 | 24-Nov-15 | 2 | 2 | 2 | 2 |
| 8  | 56 | 24-Nov-15 | 2 | 2 | 2 | 2 |
| 8  | 21 | 24-Nov-15 | 2 | 2 | 2 | 2 |
| 7  | 24 | 24-Nov-15 | 2 | 2 | 2 | 2 |
| 6  | 43 | 24-Nov-15 | 2 | 2 | 2 | 2 |
| 4  | 41 | 23-Nov-15 | 2 | 2 | 2 | 2 |
| 6  | 43 | 23-Nov-15 | 2 | 2 | 2 | 2 |
| 7  | 53 | 23-Nov-15 | 2 | 2 | 2 | 2 |

|    |    |           |   |   |   |   |
|----|----|-----------|---|---|---|---|
| 7  | 29 | 23-Nov-15 | 2 | 2 | 2 | 2 |
| 6  | 17 | 23-Nov-15 | 2 | 2 | 2 | 2 |
| 8  | 35 | 23-Nov-15 | 2 | 2 | 2 | 2 |
| 7  | 39 | 23-Nov-15 | 2 | 2 | 2 | 2 |
| 9  | 57 | 23-Nov-15 | 2 | 2 | 2 | 2 |
| 7  | 13 | 23-Nov-15 | 2 | 2 | 2 | 2 |
| 8  | 33 | 23-Nov-15 | 2 | 2 | 2 | 2 |
| 7  | 57 | 23-Nov-15 | 2 | 2 | 2 | 2 |
| 6  | 39 | 23-Nov-15 | 2 | 2 | 2 | 2 |
| 8  | 58 | 23-Nov-15 | 2 | 2 | 2 | 2 |
| 9  | 12 | 17-Nov-15 | 2 | 2 | 2 | 2 |
| 6  | 58 | 17-Nov-15 | 2 | 2 | 2 | 2 |
| 7  | 20 | 17-Nov-15 | 2 | 2 | 2 | 2 |
| 10 | 10 | 17-Nov-15 | 2 | 2 | 2 | 2 |
| 7  | 49 | 17-Nov-15 | 2 | 2 | 2 | 2 |
| 8  | 28 | 17-Nov-15 | 2 | 2 | 2 | 2 |
| 7  | 27 | 17-Nov-15 | 2 | 2 | 2 | 2 |
| 9  | 13 | 17-Nov-15 | 2 | 2 | 2 | 2 |

[illegible]



|   |   |   |   |  |   |
|---|---|---|---|--|---|
| 2 | 2 | 0 | 0 |  | 0 |
| 2 | 2 | 0 | 0 |  | 0 |
| 2 | 2 |   |   |  |   |
| 2 | 2 | 0 | 0 |  | 0 |
| 2 | 2 | 0 | 0 |  | 0 |
| 2 | 2 | 0 | 0 |  | 0 |
| 2 | 2 | 0 | 0 |  | 0 |
| 2 | 2 | 0 | 0 |  | 0 |
| 2 | 2 | 0 | 0 |  | 0 |
| 2 | 2 | 0 | 0 |  | 0 |

|   |   |   |   |   |   |   |
|---|---|---|---|---|---|---|
| 2 | 2 |   |   | 0 | 0 |   |
| 2 | 2 |   |   | 0 | 0 |   |
| 2 | 2 |   |   | 0 | 0 |   |
| 2 | 2 |   |   | 0 | 0 |   |
| 2 | 2 |   |   | 0 | 0 |   |
| 2 | 2 |   |   | 0 | 0 |   |
| 2 | 2 |   |   | 0 | 0 |   |
| 2 | 2 |   |   |   |   |   |
| 2 | 2 |   |   |   |   |   |
| 2 | 2 | 0 | 0 |   |   | 0 |
| 2 | 2 |   |   |   |   |   |
| 2 | 2 |   |   |   |   |   |
| 2 | 2 |   |   |   |   |   |
| 2 | 2 |   |   |   |   |   |
| 2 | 2 |   |   |   |   |   |
| 2 | 2 |   |   |   |   |   |
| 2 | 2 |   |   |   |   |   |
| 2 | 2 |   |   |   |   |   |
| 2 | 2 |   |   |   |   |   |
| 2 | 2 |   |   |   |   |   |
| 2 | 2 | 0 | 0 | 0 | 0 | 0 |
| 2 | 2 |   |   | 0 | 0 |   |

[illegible]

[illegible]



[illegible]

[illegible]
